# Supplementary material for: Synthetic chimeric nucleases function for efficient genome editing
Source: PubMed Central journal article supplement (PMC6892893; doi:10.1038/s41467-019-13500-y), 2019-12-04
Supplement: 41467_2019_13500_MOESM1_ESM.pdf [file 41467_2019_13500_MOESM1_ESM.pdf]

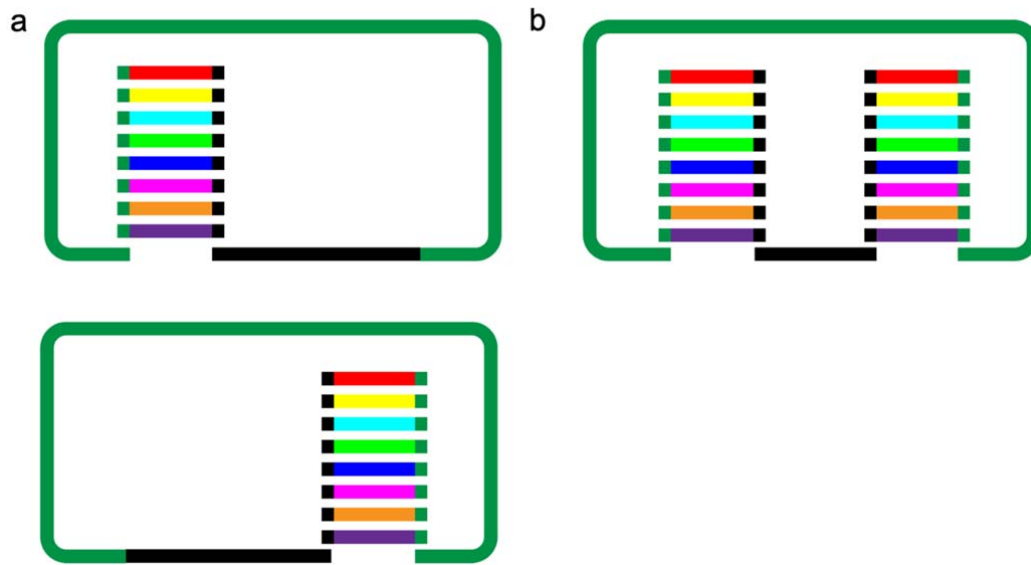

**Supplementary Fig. 1 The chimera Library construction.** MAD7 has the highest editing efficiency in the initial test (Fig. 1b). Thus, we used MAD7 (in black color) as template and MAD7 original plasmid (in dark green color) as backbone. Using the crossover points in Fig 1c, we designed each chimera library sequences (Table S1) using a ~40bp homology arm with MAD7 and its plasmid. The chimera sequences were shown in different colors except black and dark green, and the homology arm were shown in black and dark green, and linked to the chimera sequences. The library construction for crossover 1 (a) and 2 (b) were used Gibson assembly method. (a) The library construction used 1 crossover. The library variants for 1 crossover should be 48 (8 chimera sequences x 6 positions) theoretically. (b) The library construction used 2 crossovers. The library variants for 2 crossovers should be 512 (8 chimera sequences x 8 chimera sequences x 8 combinations) theoretically. Thus, the total number of variants should be 560 theoretically.

CLUSTAL O(1.2.4) multiple sequence alignment

|           |                                                                 |     |
|-----------|-----------------------------------------------------------------|-----|
| CR_Cas12a | -----MSFDSFTNLYSLSKTLKFEMRPVGNTQKMLDN-----AGVFEKDKLIQKKY        | 46  |
| SD_Cas12a | -----MSSLTKFTNKYSKQLTIKNELIPVGKTLENIKE-----NGLIDGDEQLNENY       | 47  |
| As_Cas12a | -----MTQFEGFTNLYQVSKTLRFELIPQGKTLKHIQE-----QGFIEEDKARNNDHY      | 47  |
| TX_Cas12a | -----MTKTFDSEFFNLYSLOKTVRFELKPVGETASFVEDFKNEGLKRVVSEDEBRAVDY    | 55  |
| Lb_Cas12a | -----MSKLEKFTNCYLSKTLRFKAIPVGKTQENIDN-----KRLLVEDEKRAEDY        | 47  |
| PC_Cas12a | -----MDSLKDFTNLYPVSKTTLRFELIPQGKTLEFIQE-----KGLLSQDKQRAESY      | 47  |
| FB_Cas12a | -----MTNKFTNQYLSKTLRFELIPQGKTLEFIQE-----KGLLSQDKQRAESY          | 45  |
| MAD7      | MN---NGTNNFNQNFIGISSLOKTLRNALIPTETTQQFIVK-----NGI I KEDEL RGENR | 51  |
| CT_Cas12a | -----MNNDYDEFTKLYPIQKTIRFELKPVGRTMEHLET-----FNFFEDRDRAEKY       | 47  |
| CA_Cas12a | MHTGGLLSMDAKEFTGQYPLSKTLRFELRPIGRTWDNLEA-----SGYLAEDRHRRAECY    | 54  |
|           | * . *:: * * . :                                                 |     |
| CR_Cas12a | GKTkPYFDRLHREFIEEALTGVELIGLDENFR----TLV----DW--QKDKNNVAM-KA     | 95  |
| SD_Cas12a | QKAKIIVDDFLRDFINKALNNTQIGN-----WRELADALNKEDEDNIEKLQDKI-RG       | 98  |
| As_Cas12a | KELKPIIDRIYKTYADQCLQLVQL-D-----WENLSAAIDSYRKEKTEETRN----A       | 94  |
| TX_Cas12a | QKVKEIIDDYHRDFIEESLNYFPEQVSKD----ALEQAFHLYQKLKAAKVEEREKAL-KE    | 110 |
| Lb_Cas12a | KGVKLLDRYYSFINDVLHSIKLK-----NLNNYISLFRKK--TRTEKENKEL-EN         | 96  |
| PC_Cas12a | RRVKKIIDTYHKVFIDSSLENMAKMGIEENIKAMLOSFCELYKDD--HRTEGEDKAL-DK    | 104 |
| FB_Cas12a | QEMKKTIDKFHKYFIDLALSNAKLT-----HLETYLELYNKS--AETKKEQKFK-DD       | 94  |
| MAD7      | QILKDIMDDYRGFISETLSSIDDID-----WTSLFKMEIQ--LK-NGDNKD---T         | 97  |
| CT_Cas12a | KILKEAIDEYHKKFIDEHLTNM-SLD-----WNSLKQISEKY--YK-SREEKDKK-V       | 94  |
| CA_Cas12a | PRAKELLDNHR AFLNRVLPQI-DMD-----WHPIAEAFCKV--HK-NPGNKELAQD       | 102 |
|           | * . * : . *                                                     |     |
| CR_Cas12a | YENSLOQLRTEIGKIFNLKAEDWVK-----NKYPILGLKNKNTDILFEEAVFGILKARY     | 149 |
| SD_Cas12a | IIVSKFETFDLFSSYSIKKDEKIIDDDNDVEEEELDLGKKTSSFYIFKKNLFLVLPSY      | 158 |
| As_Cas12a | LIEEQATYRNAIHDFYIGRTDNLTDAINK-----RHAEIYKGLFKAELFNGKVLKQ        | 145 |
| TX_Cas12a | WEALQKKLREKVVKCFSDSNKA-----RFSRIDKKELIKEDLINW                   | 150 |
| Lb_Cas12a | LE---INLRKEIAKAFKNE-----GYKSLFKKDIETILPEF                       | 131 |
| PC_Cas12a | IR---AVLRGLIVGAFTGVCGRREN-----TVQNEKYESLFKEKLILPELDF            | 149 |
| FB_Cas12a | LKKVQDNLRKEIVKSFSDGDAKS-----IFAILDKKELITVELEKW                  | 135 |
| MAD7      | LIKEQTEYRKAIHKKFANDD-----RFKNMFSAKLISDILPEF                     | 135 |
| CT_Cas12a | FLSEQKRMROI VSEFKKDD-----RFKDLFSKLLFSELLKEE                     | 132 |
| CA_Cas12a | YNLQLSKRRKEISAYLQDAD-----GYKGLFAKPALDEAMKI-                     | 139 |
|           | . :                                                             |     |
| CR_Cas12a | GEEKDTFIEVEEIDKTGKSKINQISIFDSWKGFTGYFKKFFETRKNFYKNDGTSTAIATR    | 209 |
| SD_Cas12a | -----L--KTT-----NQDKLKIISFDNFSTYFRGFFENRKNIFTKKPISTSIAYR        | 203 |
| As_Cas12a | -----LGTVTT-----TEHENALLRSFDKFTTYFSGFYENRKNVFS AEDISTAI PHR     | 192 |
| TX_Cas12a | -----LVAQNRED-----DIPTVETFNNTTYFTGFHENRKNIYKDDHATAISFR          | 196 |
| Lb_Cas12a | -----LDDKDE-----IALVNSFNGFTTAFTGFFDNRENMFSEEAKSTSIAFR           | 174 |
| PC_Cas12a | -----VLSTEAESLPFSVEEATRSLKEFDSFTSYFAGFYENRKNIYSTKQPSTAIAYR      | 202 |
| FB_Cas12a | -----FENNEQKD-----IYFDEKFKTFTTYFTGFHQNRKNMYSVEPNSTAIAYR         | 180 |
| MAD7      | -----VIHNNNYS-ASEKEEKTQVIKLSRFATSFKDYFKNRANCF SADDISSSSCHR      | 187 |
| CT_Cas12a | -----IYKKN-----HQEIDALKSFDKFSGYF IGLHENRKNMYS DGDEITAI SNR      | 178 |
| CA_Cas12a | -----AKENGN-----ESDIEVLEAFNGFSVYFTGYHESRENIYSDEDMV-SVAYR        | 184 |
|           | : . * : * . . . * * : . :                                       |     |
| CR_Cas12a | IIDQNLKRFIDNLSIVESVRQKVDLA----ET-----EKSFSISLSQFFSIDFYNC        | 257 |
| SD_Cas12a | IVHDNFPKFLDNIRCFNVWQTECPQL--IVKADNYLKSKNVIAKDKSLANYFTVGAYDYF    | 261 |
| As_Cas12a | IVQDNFPKFKENCHIFTRLITAVPSL--REHFENVKKAIG-IFVSTSI EEFV SFPFY NQL | 249 |
| TX_Cas12a | LIHENLPKFFDNVISFNKLKEGFPEL-KFDKV-----KEDLEVVDYDLKHAF EIEYFVNF   | 249 |
| Lb_Cas12a | CINENLTRYISNMDIFEKVD AIFDKH-EVQEI-----KEKILNSDYDVEDDFEIEYFNFV   | 228 |
| PC_Cas12a | LIHENLPKFDNIVLQKIKPIA--KELEHIRADFSAGGYIKKDERLEDIFSLNYIHV        | 260 |
| FB_Cas12a | LIHENLPKFL ENAKAF EKIKQVESLQVNFRELMGEFGDEGLIFV-NELEEMFQINYYNDV  | 239 |
| MAD7      | IVNDNAEIFFSNALVYRRIVKLSLND-DINKISGDM---KDSLKEMSLEEIYSYEKYGEF    | 243 |
| CT_Cas12a | IVNENFPKFLDNLQKYQEARKKYPE--WIIKAESAL-----VAHNIKMDVEVFSLEYFNKV   | 231 |
| CA_Cas12a | ITEDNFRFVSNALIFDKLNESHDPD--IISEVSGNL-----GVD--DIGKYFDVSNYNNF    | 235 |
|           | ..* : .* . : . :                                                |     |
| CR_Cas12a | LLQDGDIDYNNKIIGGETLKNG-EKLI GLNELINQYRQNNK-----DQKIPFFKLLDKQ    | 309 |
| SD_Cas12a | LSQNGIDFYNNIIGGLPAFAGHEKIQGLNEFINQECQKDSSELKSKLKNRHAFKMAVLFKQ   | 321 |
| As_Cas12a | LTQTQIDLYNQLLGGISREAGTEKIKGLNEVLNLAIQKNDETAHII-ASLPHRFIPLFKQ    | 308 |
| TX_Cas12a | VTQAGIDQYNYLLGGKTLEDG-TKKQGMNEQINLFKQQQTRDK----ARQIPKLIPLFKQ    | 304 |
| Lb_Cas12a | LTQEGIDVYNAIIGGFVTESEG-EKIKGLNEYINLYNQK--T-----KQKLPKFKPLYKQ    | 279 |
| PC_Cas12a | LSQAGIEKYNALIGKIVTEGD-GEMKGLNEHINLYNQO--RGR----EDRLPLFRPLYKQ    | 313 |

|           |                                                                |             |
|-----------|----------------------------------------------------------------|-------------|
| FB_Cas12a | LSQNGITIYNSIIISGF-TKND- IKYKGLNEYINNYNQT--KDK----KDRLPKPKQLYKQ | 291         |
| MAD7      | ITQEGISFYNDICGKV-----NSFMNLYCQKNK--E----NKNLKYLQKLHKQ          | 285         |
| CT_Cas12a | LNQEGIQRYNLALGGYVTKSG-EKMMGLNDALNLAHQSEK--S----SKGRIHMTPLFKQ   | 284         |
| CA_Cas12a | LSQAGIDDYNIIGGHTTEDG-L-IQAFNVVLNLRHQKD---P----GFEKIQFKQLYKQ    | 286         |
|           | : * * ** . * : * * : * **                                      |             |
|           |                                                                | Crossover 1 |
| CR_Cas12a | ILSEK----ILFLDEIKNDTELIEALSQFAKTAEEK-----TKIVKKLFA--DFVE       | 354         |
| SD_Cas12a | ILSDR-E-KSFVIDEFESDAQVIDAVKNFYAEQCKD-----NNVIFNLLNLIKNI        | 370         |
| As_Cas12a | ILSDR-NTLSFIEEFKSDEEVIQSFCKYKTLR--RN-----ENVLETAEAL----FN      | 354         |
| TX_Cas12a | ILSERTESQSFIPKQFESDQELFDSLQKLHNNC-----QDKFTVLQQA---IL          | 349         |
| Lb_Cas12a | VLSDR-ESLSFYGEGYTSDEEVLEVFRNTLNKNS-----EIFSSIKKLEKL---FK       | 326         |
| PC_Cas12a | ILSDR-EQLSYLPESFEKDEELLRALKEFYDHIA-----EDILGRTOQL---MT         | 358         |
| FB_Cas12a | ILSDR-ISLSFLPDAFTDGKQVLKAIKFDYKINLLSYTIEGQEESONLLLLIRQT---IE   | 347         |
| MAD7      | ILCIA-DTSYEVVPYKFESDEEVYQSVNGFLDNISSK-----HIVERLRKI---GD       | 331         |
| CT_Cas12a | ILSEK-ESFSYIPDVFTEDSOLLPSIGGFFAQIEND-----KDGNI FDRALEL---IS    | 333         |
| CA_Cas12a | ILSVR-TSKSYIPKQFDNSKEMVDCICDYVSKIEKS-----ETVERALKL---VR        | 332         |
|           | : * . . . : .                                                  |             |
| CR_Cas12a | NNSKYDLAQIYISQ-EAFNTISNKWTSETETFAKYLFEAMKSGKL-----AKYEKKDN     | 406         |
| SD_Cas12a | FLSDDEL DGI FIEG-KYLSSVSQKLYSDWSKLRNDIEDSANSKQGNKELAKKIKTNK--G | 427         |
| As_Cas12a | ELNSIDLTHIFISH-KKLETISSALCDHWDTLRNALYERRISELTGKI----TKSAK--E   | 407         |
| TX_Cas12a | GLAEADLKKVFIKT-SDLNALSNTIFGNYSVFS DALNLYKESLKTTKKAQ-----       | 397         |
| Lb_Cas12a | NFDEYSSAGIFVKNPAISTISKDIFGEWNVIRDKWNAEYDDIHLKKKAVVTEKYEDDRR    | 386         |
| PC_Cas12a | SISEYDL SRIYVRNDSQLTDISKMLGDWNAIYMARERAYDHEQAPK--RITAKYERDRI   | 416         |
| FB_Cas12a | NLSSFDTQKIYLNKNDTHLTTISQVFGDFSVFSTALNYWYETKVNPK--FET-EYSKANE   | 404         |
| MAD7      | NYNGYNLDKIYIVS-KFYESVSQKTYRDWETINTALEIHYNNILPGNGKSKADK-----    | 384         |
| CT_Cas12a | SYAEYDTERIYIRQ-ADINRVSNVIFGEWGTGGLMREYKADSINDINLERT-----       | 384         |
| CA_Cas12a | NISSFDLRGIFVVK-KNLRILSNKLI GDWDIAIETALMHSSSEND-----            | 376         |
|           | . : : : * . . :                                                |             |
| CR_Cas12a | ----SY-KFP-----DFIALSOMKSALLSISLEGHFWEKYYKISKFQ-EKTNWEQ        | 451         |
| SD_Cas12a | ----DVEKAISK-----YEFSLSELNSIVHDNT-----                         | 451         |
| As_Cas12a | ----KVQRSLKH-----EDINLQEIISAA--GK-----                         | 429         |
| TX_Cas12a | ---EAFEKLP AH-----SIHDLIQYLEQFNSSL-----DAEKQOSTDTVLNY          | 436         |
| Lb_Cas12a | ---KSFKKIGSF-----SLEQLQEYADADLSV-----VEK                       | 413         |
| PC_Cas12a | ---KALKGEESISLANLN SCIAFLDNV-----RDCRVDT                       | 447         |
| FB_Cas12a | KKREILDKAKAVFTKQDYFSIAFLQEV LSEYILTLDH-----TSDIVKKHSSNCIADY    | 457         |
| MAD7      | ----VKKAVKN---DLQKSITEINELVSNYK LCS-----DD---NI                | 415         |
| CT_Cas12a | ----CKKVDKW---L-DSKEFALSDVLEAIKRTG-----NNDAFN-                 | 416         |
| CA_Cas12a | -----KKS VY---D-SAEFTLDDIFSSVKKFS-----DASAEDI                  | 407         |
|           | : :                                                            |             |
| CR_Cas12a | FLAIFLY---EFNSLFS DKINTKDGETKQVGYLFAKDLHNLIL-----SEQI-----     | 496         |
| SD_Cas12a | -----KFSDLLSCTLHKVASE--K-----LVKV-----NEGDPKH                  | 480         |
| As_Cas12a | -----ELSEAFKQKTSEILS---H-----AHAA-----LDQPLPTT                 | 457         |
| TX_Cas12a | FIKT-----DELYSRFIKSTSEFTQ----VQPLFELEALSSKRRPPESEDEGAKG        | 483         |
| Lb_Cas12a | L-----KEII IQKVDEIYKVYGS-----SEKLF DADF-----V--LEKSL---        | 446         |
| PC_Cas12a | YLSTL GQK--EGPHGLSNLVENVFASYHE-----AEQLLSFPY-----P--EENNL---   | 489         |
| FB_Cas12a | FKNHFVAKKENETDKTFDFIANITAKYQC-----IQGILENAD-----Q--YEDEL---    | 501         |
| MAD7      | -----K-AETYIHEISHILNNFEA-----QELK--Y-----NPEI-----HL           | 444         |
| CT_Cas12a | -----EYISKMRTAREKIDA----ARKEMK--F-----I-SE-----KI              | 443         |
| CA_Cas12a | -----GNRAEDICRVISETAPFIN----DLRAVD--L-----D-SL-----ND          | 438         |
|           | : : : . :                                                      |             |
| CR_Cas12a | DIPKDSKVTIKDFADSVLTIYQMAKYFAVEKKRAWLAEYELD-SFYTQPD TGYLQFYDNA  | 555         |
| SD_Cas12a | LKNNEEKQKIKEPLDALLEIYNTLLIFNCKS-----FNKN-GNFYVDYD----RCINEL    | 529         |
| As_Cas12a | LKKQEEKEILKSQDLSLLGLYHLLDWF AVDE-----SNEVDPEFSARLT----GIKLEM   | 507         |
| TX_Cas12a | QEGFEQIKRIKAYLDTLMEAVHFAKPLYLVKGRKMIEGLDKDQSFYEAFE----MAYQEL   | 539         |
| Lb_Cas12a | KKNDAVVAIMKDLLDSVKS FENYIKAFFGEGK-----ETNRDES FYGDFV----LAYDIL | 497         |
| PC_Cas12a | IQDKDNVVLIKNLLDNISDLQRFLKPLWGMGD-----EPDKDERFYGEYN----YIRGAL   | 540         |
| FB_Cas12a | KQDQKLIDNLKFFLDAILLELHFIKPLHLKSES----ITEKDTAFYDVFE----NYYEAL   | 553         |
| MAD7      | VESELKASELKNVLDVIMNAFHWC SVFMTE-E-----LVDKDNNFYAELE----EIYDEI  | 494         |
| CT_Cas12a | SGDEESIHIKTL LLSVQQLHFFNLFKAR-Q-----DIPLDGAFYAEFD----EVHSKL    | 493         |
| CA_Cas12a | DGYEAAVSKIRESLEPYMDLFHELEIFSVG-D-----EFPKCAAFYSELE----EVSEQL   | 488         |
|           | : : : . *                                                      |             |
| CR_Cas12a | YEDIVQVYNKLRNYLTKKPYSEEKWKLNFNENSTLANGWDKNKESDNSAVILQGGKYYLG   | 615         |
| SD_Cas12a | --SSVVYLYNKTRNYCTKKPYNTDKFKLNFNSPQLGEGFSKSKENDCLTLLFKDDNYVVG   | 588         |
| As_Cas12a | -EPSLSFYNKARNYATKKPYSVEKFKLNFQMPTLASGWDVNKEKNNGAILFVKNGLYYLG   | 566         |

|           |                                                               |     |
|-----------|---------------------------------------------------------------|-----|
| TX_Cas12a | ESLIIPYINKARSYLSRKPFFKADKFKINFDNNTLLSGWDANKETANASILFKKDGLYLGL | 599 |
| Lb_Cas12a | -LKVDHIYDAIRNYVTQKPYSKDKFKLYFQNPQFMGGWDKDKETDYRATILRYGSKYLLA  | 556 |
| PC_Cas12a | -DQVIPLYNKVRNYLTRKPYSTRKVKLNFGNSQLLSGWRNKEKDNSCVILRKGQNFYLA   | 599 |
| FB_Cas12a | -SLLTPLYNMVRNYVTQKPYSTEKIKLNFENAQLLNGWDANKEGDYLT'TILKKDGNFYLA | 612 |
| MAD7      | -YPVISLYNLVRNYVTQKPYSTKKIKLNFNGIPTLADGWSKSKEYSNNAILMRDNLYYLG  | 553 |
| CT_Cas12a | -FAIVPLYNKVRNYLTKNLNTKKIKLNFKNPTLANGWDQNKVYDYASLIFLRDGNYYLG   | 552 |
| CA_Cas12a | -IEIIPLFNKARSFCTRKRYSTDKIKVNLKFPPTLADGWDLNKERDNKAAILRKGDKYLLA | 547 |

.: : \* . : : : . \* \* : : : \* : . \* : : . : : :

### Crossover 2

|           |                                                           |     |
|-----------|-----------------------------------------------------------|-----|
| CR_Cas12a | LITKGHNKIFDDRFQE-----KFIVGIEGGKYEKIVYKFFPDQAKMFPKV        | 660 |
| SD_Cas12a | IIRKGAKINFDDT-----QAIADNTDNCIFKMNYFLLKDAKFIKPC            | 630 |
| As_Cas12a | IMPQKQGRYKALS-----FEPTKTSSEGFDMYDYFPAKMPKC                | 608 |
| TX_Cas12a | IMPKGKTFLLFDYFVSSSEKQRRQKTAEEALAQDGESYFEKIRYKLLPGASKMLPKV | 659 |
| Lb_Cas12a | IMDKKYAKCLQKI-----DKDDVNGNYEKINYKLLPGPNKMLPKV             | 596 |
| PC_Cas12a | IMNHRHRSFENKVL-----PEYKEGEPYFEKMDYKFLPDPNKMLPKV           | 642 |
| FB_Cas12a | IMDKKHNAF-----QKFPEGKENEKMYKLLPGVNMKMLPKV                 | 650 |
| MAD7      | IFNAKNKPKDKKII-----EGNTSENKGDYKMMIYNLLPGPNKMLPKV          | 595 |
| CT_Cas12a | IINPKRKNIKFE-----Q--GSGNGPFYRKMVYKQIPGNKMLPRV             | 592 |
| CA_Cas12a | ILDMKKDLSS-IR-----T--SDEDESSFEMEKYKLLPSPVKMLPKI           | 586 |

: : \* : \* : . \* : \* :

|           |                                                            |     |
|-----------|------------------------------------------------------------|-----|
| CR_Cas12a | CFS-AKLEFFFRPSEEILRIYNN-----AEFKKG-----                    | 688 |
| SD_Cas12a | SIQLKEVKAHFKKSEDDYILSDKEKFASPLVIKSTFLLATAHVKGKGNIKKFQKEYSK | 690 |
| As_Cas12a | STQLKAVTAHFQTHTPILLSN--NFIEPLEITKEIYDLNNP-----EKEPKKFQAYAK | 661 |
| TX_Cas12a | FFS-NKNIGFYNPSSDILRIRNT-----ASHTKNGT--PQ---KGHS--          | 695 |
| Lb_Cas12a | FFS-KKWMAYNPSEDIQKIYKN-----GTFKKG-----                     | 624 |
| PC_Cas12a | FLS-KKGIEIYKPSPKLLEQYGH-----GTHKKG-----                    | 670 |
| FB_Cas12a | FFS-NKNIAYFNPSKELLENYKK-----ETHKKG-----                    | 678 |
| MAD7      | FLSSKTGVETYKPSAYILEGYKQ-----NKHIKSS-----                   | 625 |
| CT_Cas12a | FLTSTKGKKEYKPSKEIEGYEA-----DKHIRG-----                     | 621 |
| CA_Cas12a | FVKSAAKEKYGLTDRMLECYDK-----GMHKS-----                      | 615 |

:

|           |                                                               |     |
|-----------|---------------------------------------------------------------|-----|
| CR_Cas12a | ----ETYSIDSMQKLIDFYKDLTKYEGWA-CYTFRHLKPTEEYQNNIGEFRDVAEDGY    | 743 |
| SD_Cas12a | E--NPTEYRNSLNEWIAFCKEFLKTYKAAT-IFDITLTKAAEYA-DIVEFYKVDVNLGY   | 746 |
| As_Cas12a | KTGDQKGYREALCKWIDFTRDFLSKYTKTT-SIDLSSLRPSSQYK-DLGEYYAELNPLLY  | 719 |
| TX_Cas12a | ---KVEFNLDNCHKMIDFFKSSIQKHPEWG-SFGF-TFSDTSDFE-DMSAFYREVENQGY  | 749 |
| Lb_Cas12a | ----DMFNLDNCHKLIDFFKDSISRYPKWSNAYDF-NFSETEKYK-DIAGFYREVEEQGY  | 678 |
| PC_Cas12a | ----DTFMSDDLHELIDFFKHSIEAHEDWK-QFGF-KFSDTATYE-NVSSFYREVEDQGY  | 723 |
| FB_Cas12a | ----DTFNLEHCHTLIDFFKDSLKNKHEDWK-YFDF-QFSETKSYQ-DLSGFYREVEHQGY | 731 |
| MAD7      | ----KDFDITFCHDLIDYFKNCIAIHPEWK-NFGF-DFSDTSTYE-DISGFYREVELQGY  | 678 |
| CT_Cas12a | ----DKFDLDFCHKLIDFFKESIEKHKDWS-KFNF-YFSPTESYG-DISEFYLDVEKQGY  | 674 |
| CA_Cas12a | ----SAFDLGFCHELIDYFKRCIAEYPGWD-VFDF-KFRETSYDYG-SMKEFNEDVAGAGY | 668 |

\* : : : : : : : : : : : : : \*

|           |                                                              |     |
|-----------|--------------------------------------------------------------|-----|
| CR_Cas12a | RIDFQGISDQYIHEKNEKGEHLHFEIHNKDNWLDKARDGKSKTTQKNLHTLYFESLFSND | 803 |
| SD_Cas12a | KLEFCPIKTSFIENLIDNGDLYLFRINNKDFSS-----KSTGTKNLHTLYLQAI FDER  | 799 |
| As_Cas12a | HISFQRIAEKEIMDAVETGKLYLFQIYNKDFAK-----GHHGKPNLHTLYWTGLFSPE   | 772 |
| TX_Cas12a | VISFDKIKETYIQSQVEQGNLYLFQIYNKDFSP-----YSKGKPNLHTLYWKALFEEA   | 802 |
| Lb_Cas12a | KVSFESASKKEVDKLVVEGKLYMFQIYNKDFSD-----KSHGTPNLHTMYFKLLFDEN   | 731 |
| PC_Cas12a | KLSFRKVSSEYVYSLIDQGLYLFQIYNKDFSP-----CSKGTPNLHTLYWRMLFDER    | 776 |
| FB_Cas12a | KINFKNIDSEYIDGLVNEGKLFQIYKDFSP-----FSKGKPNMHTLYWKALFEEQ      | 784 |
| MAD7      | KIDWTYISEKDIDLLQEKGLYLFQIYNKDFSK-----KSTGNDNLHTMYLKNLFSEE    | 731 |
| CT_Cas12a | RMHFENISAETIDEYVEKGLDFLQIYNKDFVK-----AATGKKDMHTIYWNAAFSPE    | 727 |
| CA_Cas12a | YMSLRKIPCSEVYRLLDEKSIYLFQIYNKDYSE-----NAHGKKNMHTMYWEGFLFSPQ  | 721 |

: : : : : : : : : : : : : : : \*

### Crossover 3 4

|           |                                                               |     |
|-----------|---------------------------------------------------------------|-----|
| CR_Cas12a | NVVQNFPIKLNQAEIFYRPKTEKDKLE--S-----                           | 832 |
| SD_Cas12a | NL--NNPTIMLNNGAELFYRKESIEQKNRITHKAGSILVNKVCK-D-----GTSL       | 846 |
| As_Cas12a | NL-AKTSIKLNQAELFYRPKSRM--KRMAHRLGEKMLNKKLKDQ-----KTP I        | 818 |
| TX_Cas12a | NL--NNVAKLNGEAEIFFRRHSIKASDKVVHPANQAIDKNPHT-----              | 846 |
| Lb_Cas12a | NH-GQ--IRLSGGAELFMRRASLKKEELVHPANSPIANKNPDNP-----             | 773 |
| PC_Cas12a | NL-ADVIYKLDGKAEIFFRKSILKNDHPHTHPAGK-PIK-----KKS-----          | 816 |
| FB_Cas12a | NL-QNVIYKLNQAEIFFRKASIKPNKIILHKKKIKIAKHFIDKKTKT-----SEIV      | 836 |
| MAD7      | NL-KDIVLKLNGEAEIFFRKSSIK--NPIIHKKGSILVNRTYEAEEKDQFGNIQIVRKN I | 788 |
| CT_Cas12a | NL-QDVVVKLNQAELFYRDKSDI--KEIVHREGEILVNRTYNG-----RTPV          | 772 |
| CA_Cas12a | NL-ESPVFKLSGGAELFFRKSSIPNDAKTVHPKGSVLVPRNDVN-----GRR I        | 768 |

\* . \* . \* \* \* \* :

|           |                                                               |     |
|-----------|---------------------------------------------------------------|-----|
| CR_Cas12a | -----KKDKKGNKVIDHKRYSENKIFFHVP                                | 857 |
| SD_Cas12a | DDKIRNEIYQYENK--FIDTLSDEAKKVLPN---VIKKEATHDITKDKRFTSDKFFFHCP  | 901 |
| As_Cas12a | PDTLYQELYDYVNHRLSHDLSDEARALLPN---VITKEVSHEI IKDRRFTSDKFFFHVP  | 874 |
| TX_Cas12a | -----KTQSTFEYDLVKDKRYTQDKFFFHVP                               | 872 |
| Lb_Cas12a | -----KKTTTLSYDVYKDKRFSESDQYELHIP                              | 799 |
| PC_Cas12a | -----QK-----KGEESLFEYDLVKDRHYTMDKQFHFVP                       | 845 |
| FB_Cas12a | PVQTIKNLNMYYQGKISEKELTQDDLRYIDNFSIFNEKNKTIDI IKDKRFTVDKQFHFVP | 896 |
| MAD7      | PENIYQELYKYFNDK-SDKELSDEAAKLKNV---VGHHEAATNIVKDYRYTYDKYFLHMP  | 844 |
| CT_Cas12a | PDKIHKKLTDYHN-G-RTKD-LGEAKEYLDK---VRYFKAHYDITKDRRYLNDKIYFHVP  | 826 |
| CA_Cas12a | PDSIYRELTRYFNRG-DCRI-SDEAKSYLDK---VKTCKADHDIVKDRRFTVDKMMFHVP  | 823 |

. : . . : : : \* \*

### Crossover 5

|           |                                                               |     |
|-----------|---------------------------------------------------------------|-----|
| CR_Cas12a | LTLNRTKND-SYRFNAQINNFLANNKDINIIGVDRGEKHLVYYSVITQASDILESGSLNE  | 916 |
| SD_Cas12a | LTINYKEGD-TKQFNNEVLSFRLGNPDINIIGIDRGERNLIYVTVINQKEILDSVSFNT   | 960 |
| As_Cas12a | ITLNYQAANSPSKFNQRVNAYLKEHPETPIIGIDRGERNLIYITVIDSTGKILEQRSINT  | 934 |
| TX_Cas12a | ISLNFKAQG-VSKFNDKVNGLKGNPDVNIIGIDRGERHLLYFTVVNQKEILVQESLNT    | 931 |
| Lb_Cas12a | IAINKCPKN-IFKINTEVRVLLKHDDNPYVIGIDRGERNLLYIVVVDGKGNIVEQYSLNE  | 858 |
| PC_Cas12a | ITMNFKCSA-GSKVNDMVNAHIREAKDMHVIIGIDRGERNLLYICVIDSRGTILDQISLNT | 904 |
| FB_Cas12a | ITMNFKATG-GSYINQTVLEYLQNNPEVKIIGLDRGERHLVYLTLLIDQQGNILKQESLNT | 955 |
| MAD7      | ITINFKANK-TGFINDRILQYIAKEKDLHVIGIDRGERNLIYVSVIDTCGNIVEQKSFNI  | 903 |
| CT_Cas12a | LTLNFKANG-KKNLNKMWIEKFLSDEKAHIIGIDRGERNLLYYSIIDRSGKIIDQQLSNV  | 885 |
| CA_Cas12a | IAMNFKAIS-KPNLNKKVIDGIIDDQDLKIIGIDRGERNLIYVTMVDKGNILYQDSLNI   | 882 |

: : : \* . \* : : . : \* : \* : \* : \* : \* : \* : \* : \* : \* : \*

|           |                                                               |      |
|-----------|---------------------------------------------------------------|------|
| CR_Cas12a | L----NG----VNYAEKLGKKAENREQARRDWQDVQGIKDLKKGYSQVVRKLADLAIKH   | 968  |
| SD_Cas12a | VTNKSSKIEQTVDYEEKLAVREKERIEAKRSWDSISKIATLKEGYLSAIVHEICLLMIKH  | 1020 |
| As_Cas12a | I-----QQFDYQKKLDRNREKERVAARQAWSVVGTIKDLKQGYLSQVIHEIVDLMIHY    | 986  |
| TX_Cas12a | LMSD---KGHVNDYQKLDKKEQERDAARKSWTTVENIKELKEGYLSHVHKLHLAIKY     | 988  |
| Lb_Cas12a | IINNFGIRIKTDYHSLLDKKEKERFEARQNWTSIENIKELKAGYISQVVKICELVEKY    | 918  |
| PC_Cas12a | I----ND----IDYHDLLESRDKDRQOERRNWQTIEGIKELKQGYLSQAVHRIAELMVAY  | 956  |
| FB_Cas12a | I----TDSKISTPYHKLLDNKENERDLARKNWGTVENIKELKEGYISQVVKIATLMLEE   | 1011 |
| MAD7      | V----NG----YDYQIKLKQEQEGARQIARKKEWKEIGKIKEIKEGYLSLVIHEISKMIKY | 955  |
| CT_Cas12a | I----DG----FDYREKLNQREIEMKDARQSWNAIGKIKDLKEGYLSKAVHEITKMAIQY  | 937  |
| CA_Cas12a | L----NG----YDYRKALDVREYDNKEARRNWTKEGIRKMKEGYLSLAVSKLADMI IEN  | 934  |

: \* \* : : \* : \* : \* \* : : :

|           |                                                                 |      |
|-----------|-----------------------------------------------------------------|------|
| CR_Cas12a | NAI I I LEDLNMRFKQVRGG-IEKSIYQOLEKALIDKLSFLVDKGEKNPEQAGHLLKAYQL | 1027 |
| SD_Cas12a | NAIVVLENLNAGFKRIRGGLSEKSVYQKFEKMLINKLNYFVSKKESDWNKPSGLLNGLQL    | 1080 |
| As_Cas12a | QAVVLENLNFGFKSKRTGIAEKAVYQKFEKMLIDKLNCLVLKD-YPAEKVGGVLPYQL      | 1045 |
| TX_Cas12a | NAIVCLEDLNFGFKRGRFK-VEKQVYQKFEKALIDKLNLYLVFKE-KELGEVGHYLTAYQL   | 1046 |
| Lb_Cas12a | DAVIALEDLNSGFKNSRVK-VEKQVYQKFEKMLIDKLNLMVDK-SNPCATGGALKGYQI     | 976  |
| PC_Cas12a | KAVVALEDLNMFGFKRGRQK-VESVYQKFEKQLIDKLNLYLVDKK-KRPEDIGGLLRAYQF   | 1014 |
| FB_Cas12a | NAIVVMEDLNFGFKRGRFK-VEKQIYQKLEKMLIDKLNLYLVLDK-KQPQELGGLYNALQL   | 1069 |
| MAD7      | NAI IAMEDLSYGFKKGRFK-VERQVYQKFETMLINKLNYLVFKD-ISITENGGLLKGYQL   | 1013 |
| CT_Cas12a | NAIVVMEELNYGFKRGRFK-VEKQIYQKFENMLIDKMNYLVFKD-APDESPGGVLPYQL     | 995  |
| CA_Cas12a | NAIIVMEDLNHGFKAGRSK-IEKQVYQKFESMLINKLGYMVLKD-KSIDQSGGALHGYQL    | 992  |

. \* : : \* \* . \* \* \* : \* : \* \* : \* \* : \* \* : \* \* : \* \* : \*

|           |                                                               |      |
|-----------|---------------------------------------------------------------|------|
| CR_Cas12a | SAPFETFQKMGKQTGIIFYTQASYSKSDPVTGWRPHLYLKY-FSAKKAKDDIAKFTKIE   | 1086 |
| SD_Cas12a | SDQFESFEKLGIQSGFIFYVPAAYTSKIDPTTGFANVLNLSKVRNVDIAKSFNSFNEIS   | 1140 |
| As_Cas12a | TDQFTSFAKMGTSQSGFLFYVPAPYTSKIDPLTGFVDPFVWKTIKNHESRKHFLGDFDLH  | 1105 |
| TX_Cas12a | TAPFESFKKLGKQSGILFYVPADYTSKIDPTTGFVNFLDLRY-QSVEKAKQLLSDFNAIR  | 1105 |
| Lb_Cas12a | TNKFESFKSMSTQNGFIFYIPAWLTSKIDPSTGFVNLLKTKY-TSIADSKKFISSFDRIM  | 1035 |
| PC_Cas12a | TAPFKSFKEMGKQNGFLFYIPAWNTSNIDPTTGFVNLFHAQY-ENVDKAKSFFQKFDNIS  | 1073 |
| FB_Cas12a | TNKFESFQKMGKQSGFLFYVPAWNTSKIDPTTGFVNIFYTKY-ENVDKAKAFFEKFEAIR  | 1128 |
| MAD7      | TYIPDKLKNVGHQCGCIFYPVPAAYTSKIDPTTGFVNIFKFKDLT-VDAKREFIKKFDNIS | 1072 |
| CT_Cas12a | TNPLESFAKLGKQTGILFYVPAPYTSKIDPTTGFVNLFNTSSKTNAQERKEFLQKFESIS  | 1055 |
| CA_Cas12a | ANHVTTLASVKGQCGVIFYIPAAFTSKIDPTTGFADLFALSNVKNVASMREFFSKMKSVI  | 1052 |

: . : . \* \* : \* \* \* : \* \* \* : : : :

### Crossover 6

|           |                                                            |      |
|-----------|------------------------------------------------------------|------|
| CR_Cas12a | FVND--RFELTY-DIKDFQOAKE-----YPNKTVWVKV-----SNVERF          | 1122 |
| SD_Cas12a | YSK-EALFKFSFDLDS--LSKKGFSFVKFSKSKWNVY-----TFGERI           | 1182 |
| As_Cas12a | YDVK-TGDFILHFKMNRNLSFQRGLPGFM----PAWDIVFEKNETQFDAGTPIAGKRI | 1160 |
| TX_Cas12a | FNSV-QNYFEFEI-DYKKLTPKRK-----VGTQSKWVIC-----TYGDVR         | 1143 |
| Lb_Cas12a | YVPE-EDLFEFAL-DYKNFSR-TD-----ADYIKKWKLY-----SYGNRI         | 1072 |
| PC_Cas12a | YNPK-KDWFEFAF-DYKNFTK-KA-----EGSRSMWILC-----THGSRI         | 1110 |
| FB_Cas12a | FNAE-KKYFEFEVKKYSDFNP-KA-----EGTQQAWTIC-----TYGERI         | 1166 |
| MAD7      | YDSE-KNLFCFTF-DYNNFITQNT-----VMSKSSWSVY-----TYGVRI         | 1110 |
| CT_Cas12a | YSAKDGGIFAF-FAF-DYRKFGTSKT-----DHKNVWTAY-----TNGERM        | 1093 |

|           |                                                               |      |
|-----------|---------------------------------------------------------------|------|
| CA_Cas12a | YDKA-EGKFAFTF-DYLDYNVKSE-----CGRTLWTVY-----TVGERF             | 1089 |
|           | : * :                                                         |      |
| CR_Cas12a | RWDKNLNQNKGGYTHYTNITENIQELFTKY-----GIDITKDLLTQISTIDEKQNTSFFR  | 1177 |
| SD_Cas12a | IKP-KNKQGYRED-KRINLTFEMKLLNEY-----KVSFDLENNLIPNLTSANLKDTFWK   | 1235 |
| As_Cas12a | VPV-IENHRFTGRYRDLYPANELIALLEEK-----GIVFRDGSNILPKLENDSD-HAID   | 1213 |
| TX_Cas12a | YQ-NRRNQKQHWETEEVNVTEKLLKALFASDSKTTTVIDYANDDNLIDVILEQDKA-SFFK | 1201 |
| Lb_Cas12a | RIFRNPKNVDFWEEVCLTSAYKELFNKY-----GINYQOG-DIRALLCEQSDK-AFYS    | 1125 |
| PC_Cas12a | KNFRNSQKNGQWDSEEFALTEAFKSLFVRY-----EIDYTA--DLKTAIVDEKQK-DFV   | 1162 |
| FB_Cas12a | ETKRQKQNNKFVSTPINLTKIEDFLGKN-----QIVYGDGNCIKSQIASKDDK-AFFE    | 1220 |
| MAD7      | KRR-FVNGRFSNESDTIDITKMEKTLEMT-----DINWRDGHDLRQDIIDY----EIVQ   | 1160 |
| CT_Cas12a | RYI-KEKKRNEL----FDPSKEIKEALTSS-----GIKYDGGQNILPDILRSNNN-GLIY  | 1142 |
| CA_Cas12a | TYS-RVNREYVR----KVPTDIIYDALQKA-----GISVEGDL---RDRIAESDG-DTLK  | 1135 |
|           | . : :                                                         |      |
| CR_Cas12a | DFIFYFNLICQIRNTDDSEIAKKNGKDDFILSPVE----PFFDSRK---DNGNKLPENG   | 1230 |
| SD_Cas12a | ELFFIFKTTQLRNSVT-----NGKEDVLISPVKNAGEFFVSGT----HNKTLPQDCD     | 1285 |
| As_Cas12a | TMVALIRSVLQMRNSNA-----ATGEDYINSPVRDLNGVCFDSRF----QNPEWPMAD    | 1263 |
| TX_Cas12a | ELLWLLKLTMTLRHSKI-----KSEDDFILSPVKNQGEFYDSRK---AGEVWPKDAD     | 1251 |
| Lb_Cas12a | SFMALMSLMLQMRNSIT-----GRDVDLISPVKNSDGIFYDSRNYEAQENAILPKNAD    | 1180 |
| PC_Cas12a | DLLKLFKLTQMRNSWK-----EKDLDYLI SPVAGADGRFFDTRE----GNKSLPKDAD   | 1212 |
| FB_Cas12a | TLLYWFKMTLQMRNSET-----RTDIDYLI SPVMNDNGTFYNSRDYEKLENPTLPKAD   | 1274 |
| MAD7      | HIFEIFRLTVQMRNSLS---ELEDRDYDRLI SPVLNENNIFYDSAK----AGDALPKDAD | 1213 |
| CT_Cas12a | TMYSSFIAAIQMR-----VYDGKEDYIISPIKNSKGEFFRTDP----KRRELPIDAD     | 1190 |
| CA_Cas12a | SIFYAFKYALDMR-----VENREEDYIQSPVKNASGEFFCSKN----AGKSLPQDSD     | 1183 |
|           | : : : * * : * * : : : * : *                                   |      |
| CR_Cas12a | DNGAYNIARKGIVILNKISQYSEKNENCKMKWGDLYVSNIDWDFV-----            | 1277 |
| SD_Cas12a | ANGAYHIALKGLMILERNLVREEKD--T---KKIMAI SNVDWFEYVQKRRGVL*--     | 1334 |
| As_Cas12a | ANGAYHIALKGQLLNH---LKESKD--L---KLQNGISNQDWLAYIQELRN*----      | 1307 |
| TX_Cas12a | ANGAYHIALKGLWNLQQINQWEK--GK-----TLNLAIKNQDWFSFIQEKPYQE*--     | 1298 |
| Lb_Cas12a | ANGAYNIARKVLWAIQFKKADEKLD-----KVKIAISNKEWLEYAQTSVKH*----      | 1228 |
| PC_Cas12a | ANGAYNIALKGLWALRQIRQTSE--GG-----KLKLAI SNKEWLQFVQERSYEK*--    | 1260 |
| FB_Cas12a | ANGAYHIAKKGLMLLNKIDQADL--TK-----KVDLSI SNRDWLQFVQKKN*-----    | 1318 |
| MAD7      | ANGAYCIAKGLYEIKQITENWKEDGKFS---RDKLIKSNKDWDFIQNKRYL*----      | 1263 |
| CT_Cas12a | ANGAYNIALRGELTMRAIAEKFPDSEK----MAKLELKHKDWFEFMQTRGD*----      | 1238 |
| CA_Cas12a | ANGAYNIALKGILQLRMLSEQYDPNAES----IRLPLITNKAWLTFMQSGMKTWKN*     | 1235 |
|           | **** * : : : : * :                                            |      |

**Supplementary Figure 2 The amino acid sequence alignment of Cas12a proteins.** The crossover points were labeled in red. We used Clustal Omega (<https://www.ebi.ac.uk/Tools/msa/clustalo/>) for the sequence alignment.

**a**

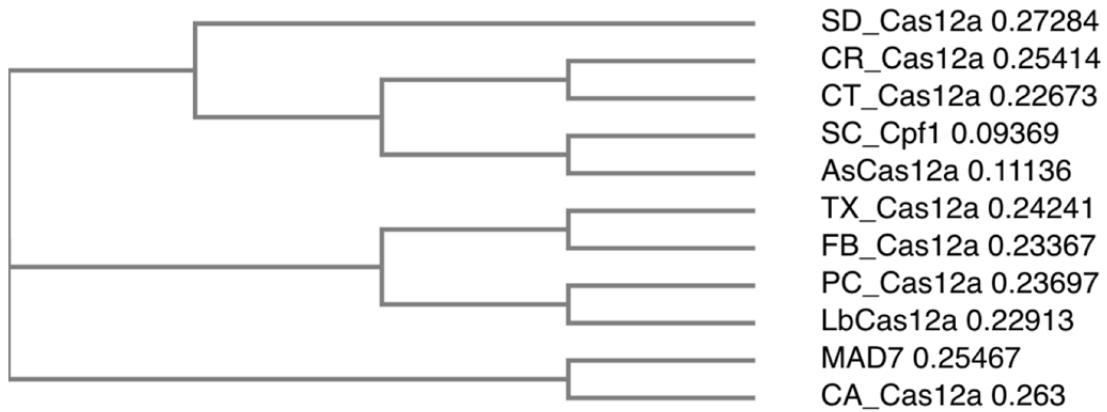

**b**

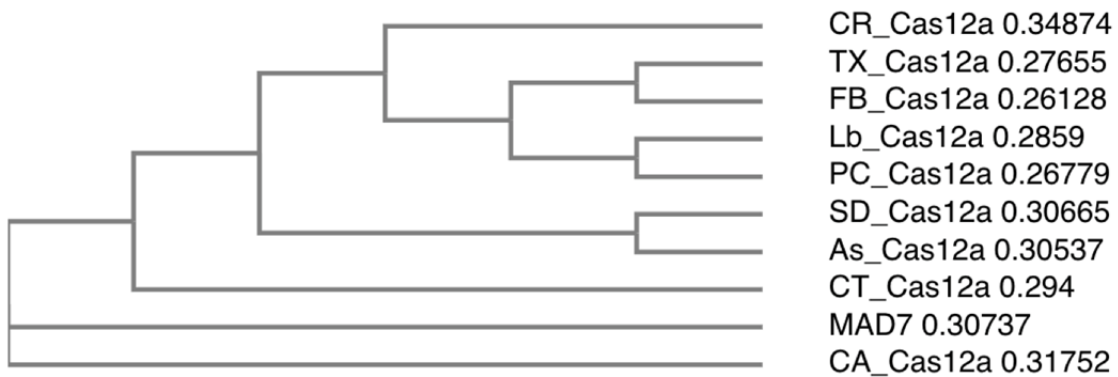

**Supplementary Fig. 3 The Phylogenetic Tree for the WT Cas12a and chimera Cas12a like gene (a) and amino acid (b) sequences.** We used Clustal Omega for the data analysis and figure generation (<https://www.ebi.ac.uk/Tools/msa/clustalo/>). As\_Cas12a and Lb\_Cas12a were reported by Feng Zhang group<sup>21</sup>. M44, M21, M38, M43, and M8 were chimera Cas12a like proteins. The numbers are the distance values which show the number of substitutions (nucleotides or amino acid residues) as a proportion of the length of the alignment (excluding gaps).

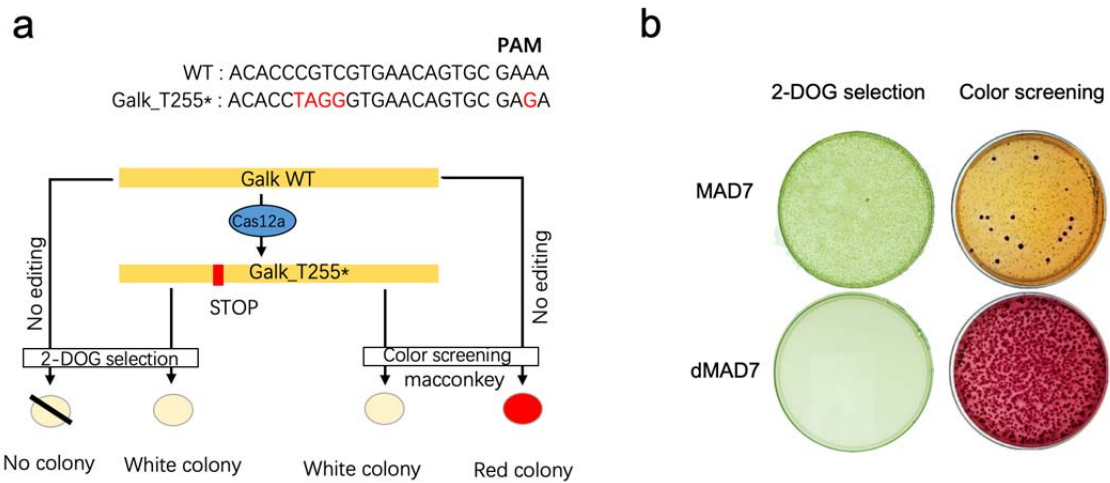

**Supplementary Fig. 4 The *galk* based growth selection and colorimetric screen for Cas12a-type chimera library.** (a) Schematic showing expected results using 2-DOG selection and Macconkey color screening. Both methods were used to find the functional MAD library variants. (b) Example plates showing the results of 2-DOG selection and Macconkey color screening test using WT MAD7 (top) or dMAD7 (bottom).



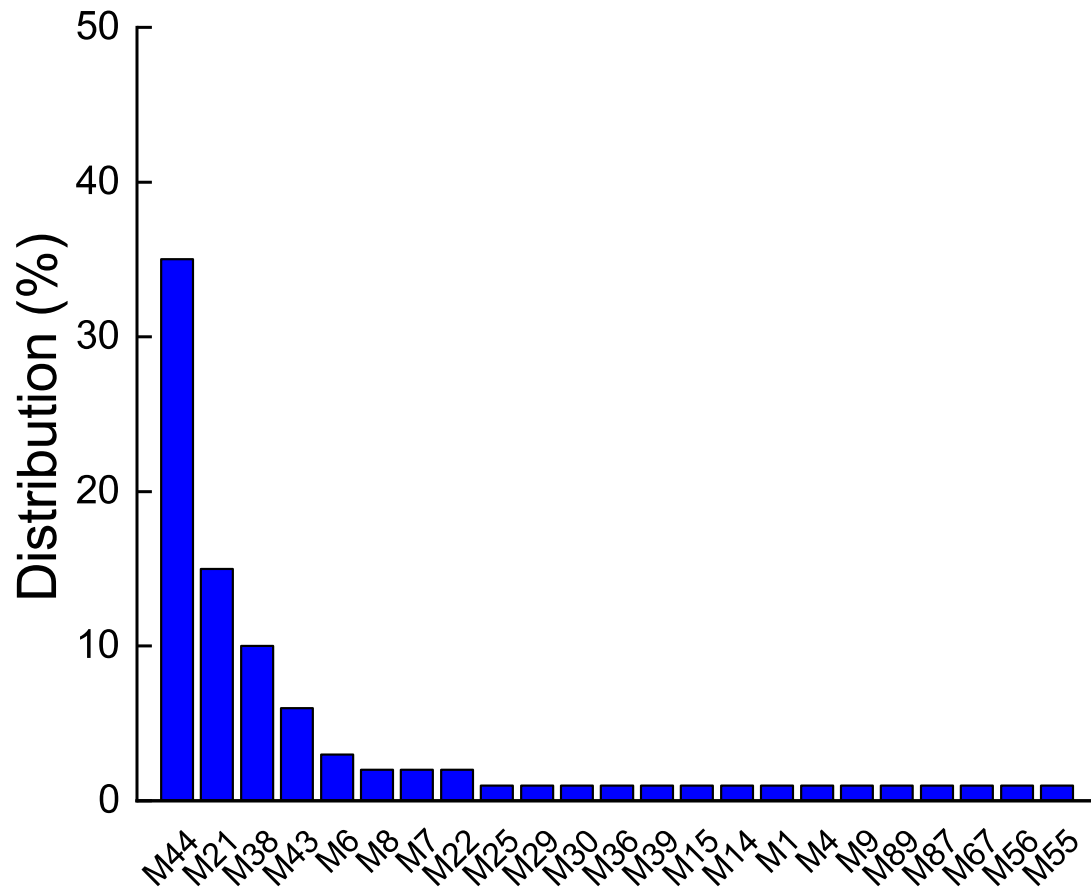

**Supplementary Fig. 5** The distribution of functional chimera Cas12a like protein identified from the 2-DOG selection.

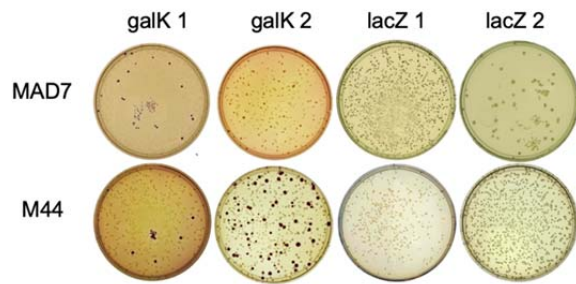

**Supplementary Fig. 6 The color screening of MAD7 and M44 with different gRNAs.**  
The edited cells in the galK/lacZ color screening should be shown as white color. The unedited cells in the galK/lacZ color screening should be shown as red color.

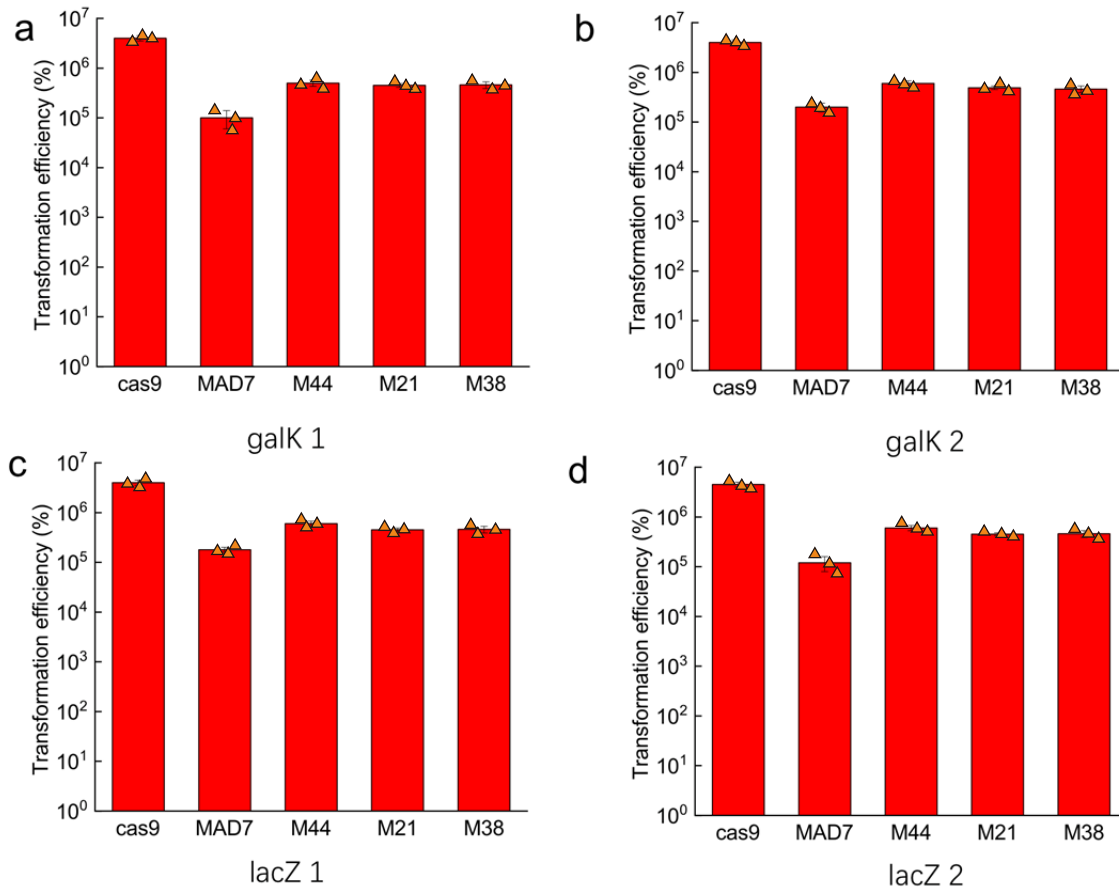

**Supplementary Fig. 7 The transformation efficiency of different chimera variants using different gRNA.** The gRNA used in the test were (a) galK1 (b) galK2 (c) lacZ1 (d) lacZ2. Transformation efficiency is defined as the number of colony forming units (cfu) per  $\mu\text{g}$  of gRNA plasmid.

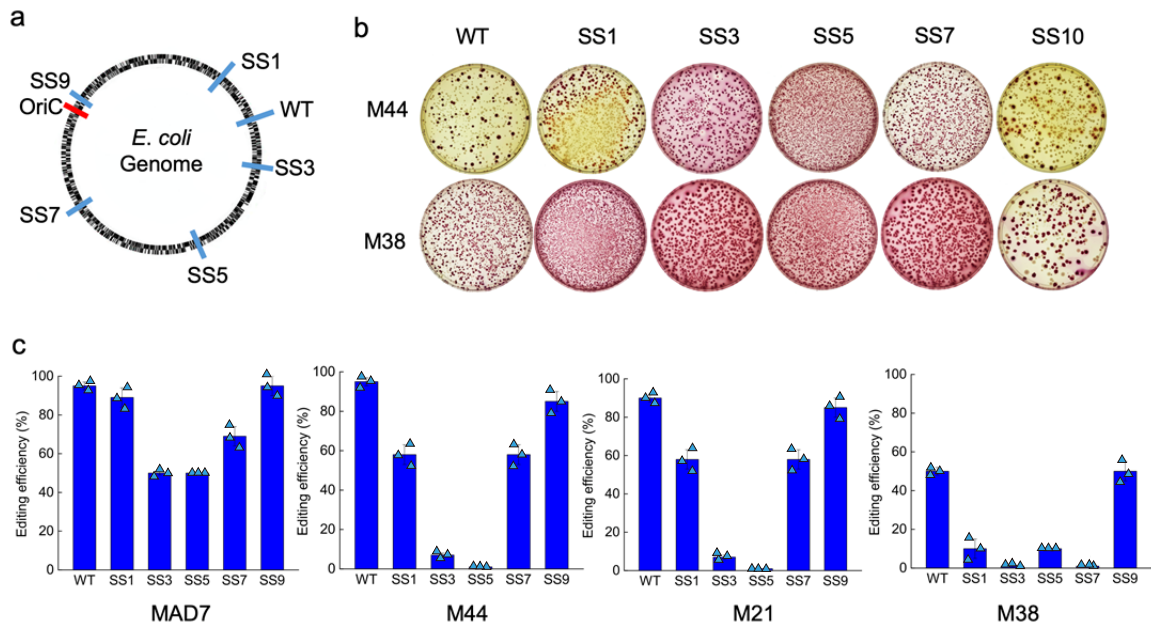

**Supplementary Fig. 8 The genome editing test in the different genomic positions for chimera library variants.** (a) The targeted genomic position. We integrated *galk* gene individually in the different genomic position (SS1, SS3, SS5, SS7, and SS9) of MG1655 $\Delta$ galK. (b) Representative plates for colorimetric screening of GalK activity with variants M44 and M38 in different genomic position. (c) The editing efficiency of chimera library variants in different genomic position.

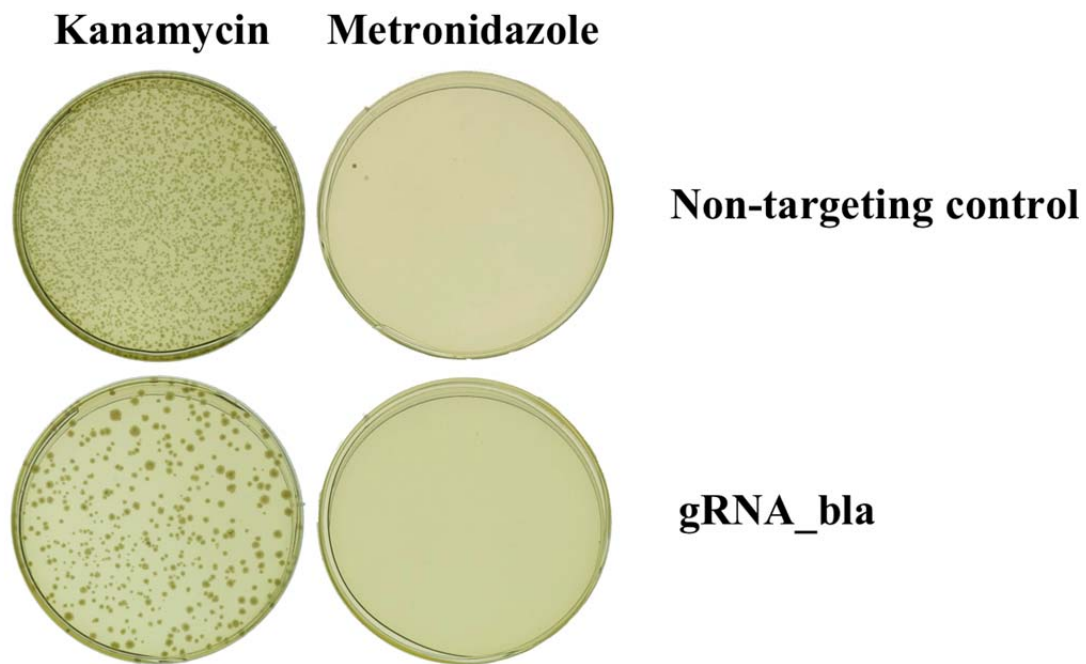

**Supplementary Fig. 9** The example for this test using dM44 for DNA binding assay. The behavior of chimera dCas12a variants could be 1) Cutting: cells cannot grow with kanamycin, but cells can grow with metronidazole; 2) DNA binding: cells cannot grow with kanamycin or metronidazole; 3) No DNA binding: cells cannot grow with metronidazole, but cells can grow with kanamycin

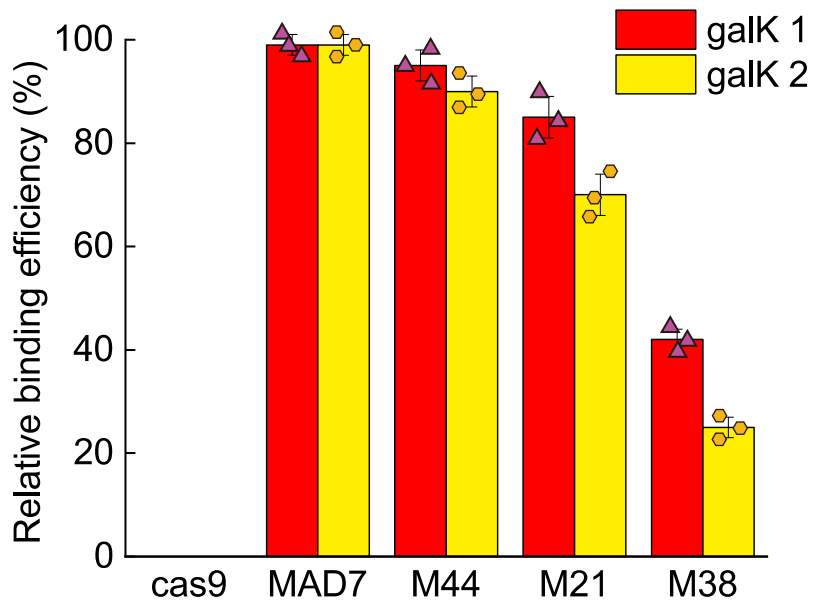

**Supplementary Fig. 10** The binding efficiency of dCas12a using different gRNA (galK\_1 and galK\_2). The binding efficiency was calculated by the following formula.

$$\text{DNA binding efficiency} = \left( 1 - \frac{\text{Cells in the LB agar plate with kanamycin}}{\text{Cells in the LB agar plate without kanamycin}} \right) \times 100\%$$

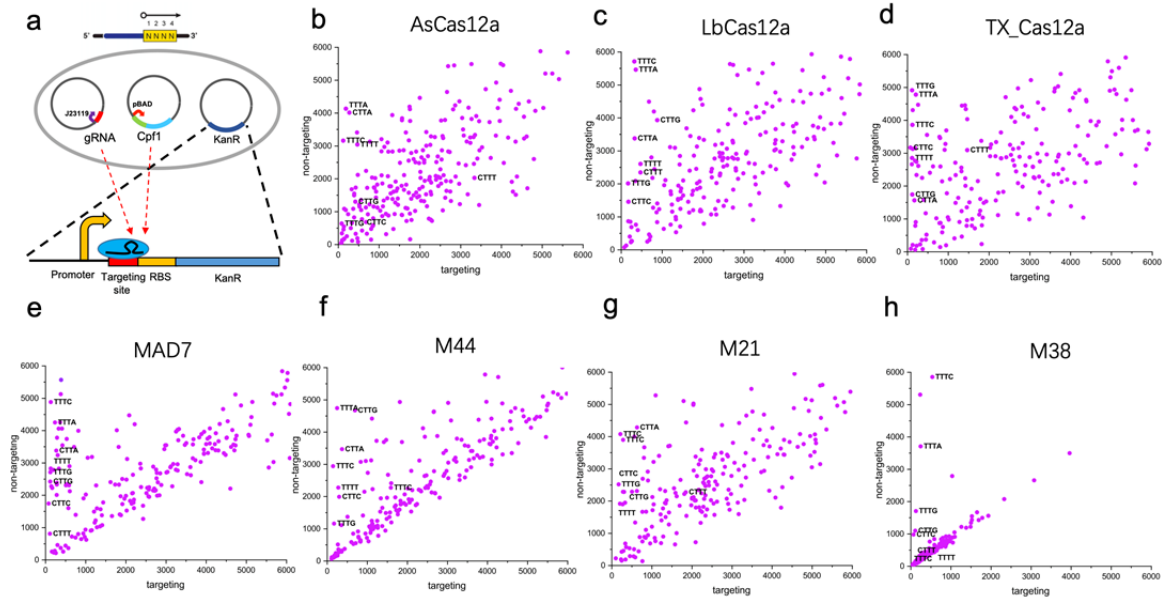

**Supplementary Fig. 11 The PAM scan of chimera Cas12a like proteins.** (a) The experiment design of PAM scan. We constructed the reporter plasmid containing *KanR* gene encoding for kanamycin resistance and the functional protospacer with NNNN PAM library. We then transformed the chimera Cas12a like proteins and one of two gRNA plasmids individually into the *E. coli* MG1655. One gRNA design is targeted on the *KanR* gene, and another gRNA plasmid is non-targeting control. These two gRNA plasmids were equivalent amount for the transformation. We collected the cells grown on kanamycin media using different gRNA plasmids, and amplified the region of the PAM library from the reported plasmid for the high throughput sequencing. The enrichment score of PAM and accompanying sequence logo for one of two library replicates revealed the PAM specificity among different chimera Cas12a like proteins. (b-h) The first round PAM scan test of different variants. (b) AsCas12a (c) LbCas12a (d) TX\_Cas12a (e) MAD7 (f) M44 (g) M21 (h) M38. The X- and Y- axis are normalized reads frequency.

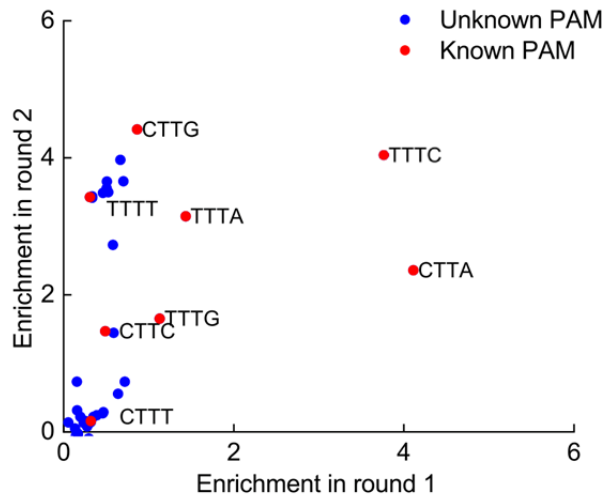

**Supplementary Fig. 12 The enrichment score of all 2 rounds of PAM scan for M38.**

The enrichment score means the frequency change ( $\log_2$ ) of each PAM using different gRNA plasmids (on-targeting and non-targeting gRNAs).



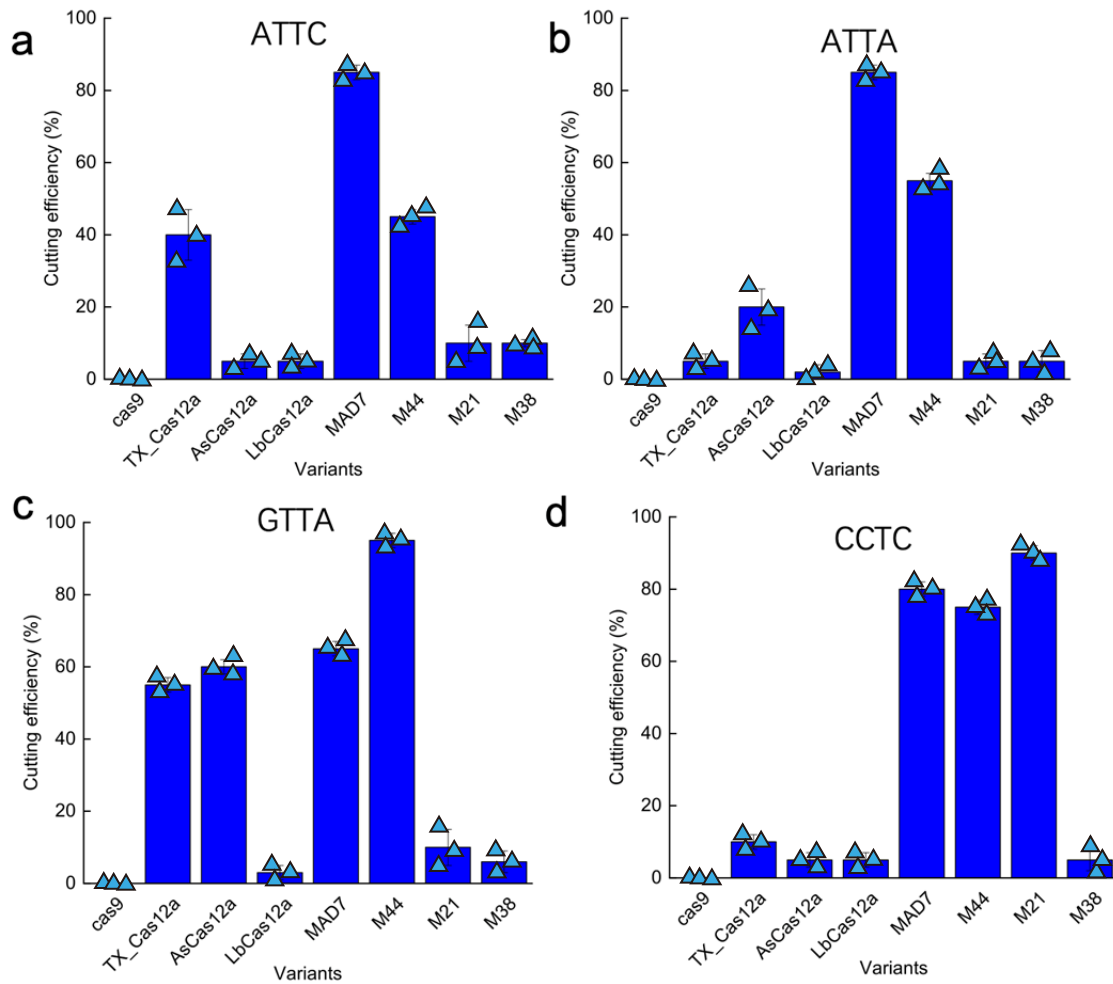

**Supplementary Fig. 13 The individual verification of unknown PAMs using different CRISPR associated proteins. (a)ATTC (b) ATTA (c) GTTA (d) CCTC.**

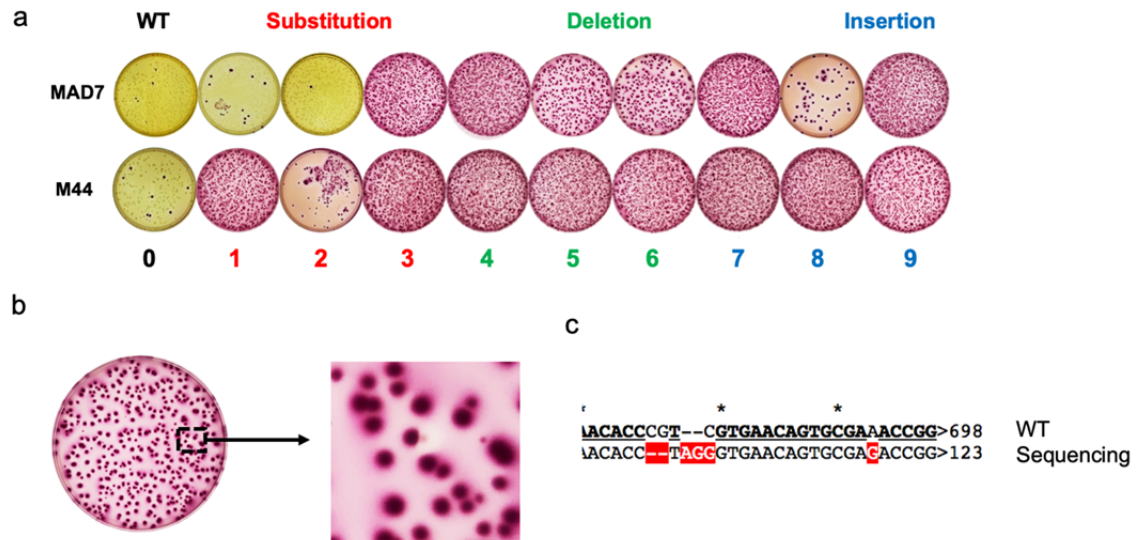

**Supplementary Fig. 14 The off-targeting test of MAD7 using 9 plasmids with off-targeting design.** (a) Representative plates for colorimetric screening of GalK activity with 9 plasmids with the off-target spacers design. WT means the plasmid with a wild-type spacer design. (b) The color screening of off-target test using design 5. (c) The sequencing verification of white colony.

**Supplementary Table 2 The Cas12a proteins sequence homology analysis**

| Cas12a proteins | Percent Identify (%) |
|-----------------|----------------------|
| LbCas12a        | 100.00               |
| AsCas12a        | 33.80                |
| SD_Cas12a       | 33.82                |
| CT_Cas12a       | 34.78                |
| TX_Cas12a       | 38.30                |
| CA_Cas12a       | 34.09                |
| PC_Cas12a       | 42.99                |
| FB_Cas12a       | 40.44                |
| CR_Cas12a       | 36.82                |
| SC_Cas12a       | 33.80                |
| MAD7            | 35.71                |

**Note:** The data analysis was used the BLAST (<https://blast.ncbi.nlm.nih.gov/Blast.cgi>) from the NCBI database.

We used LbCas12a protein sequences as query sequence.
