# Supplementary material for: Synthetic chimeric nucleases function for efficient genome editing
Source: PubMed Central journal article supplement (PMC6892893; doi:10.1038/s41467-019-13500-y), 2019-12-04
Supplement: 41467_2019_13500_MOESM2_ESM.pdf [file 41467_2019_13500_MOESM2_ESM.pdf]

Supplementary Table 1 The oligos and sequences used in this study

|           |                                                                                                                                                                                                                                                                                                                                                                                                                                                                                                                                                                                                                                                                                                                                                                                                                                                                                                                                                                                                                                                                                                                                                                                                                                                                                |
|-----------|--------------------------------------------------------------------------------------------------------------------------------------------------------------------------------------------------------------------------------------------------------------------------------------------------------------------------------------------------------------------------------------------------------------------------------------------------------------------------------------------------------------------------------------------------------------------------------------------------------------------------------------------------------------------------------------------------------------------------------------------------------------------------------------------------------------------------------------------------------------------------------------------------------------------------------------------------------------------------------------------------------------------------------------------------------------------------------------------------------------------------------------------------------------------------------------------------------------------------------------------------------------------------------|
| SD_Cpf1_1 | <p>AAGCATTGGCCGTAAGTGCATTCCGAAAGGAGATATACatgtcatcgctcacgaaattcacta<br/>         acaaatactcctaacagctcaccattaagaatgaactcatcccagttggcaaaacactggagaac<br/>         atcaaagagaatggctctgatagatggcgacgaacagctgaatgagaattatcagaaggcgaaaat<br/>         tatttggatgattttctgcgggacttcattaataaagcactgaataatacgagatcggaact<br/>         ggcgcgaactggcggatgcccttaataaaggatgaagataacatcgagaaattgcaggataaa<br/>         attcggggaatcattgtatccaaatttgaacgtttgatctgtttagcagctattctattaagaa<br/>         agatgaaaagattattgacgacgacaatgatgttgaagaagaggaactggatctgggcaagaaga<br/>         ccagctcatttaatacatattttaaaaaaacctgtttaagttagtggtgccatctacctgaaa<br/>         accacaaaccaggacaagctgaagattattagctcgtttgataatttttcaacgtacttccgcgg<br/>         gttctttgaaaaccggaaaaacatttttaccagaaccgatctccacaagtattgcgatcgca<br/>         ttgttcatgataaacttcccgaattccttgataacattcgttgttttaatgtgtggcagacggaa<br/>         tgcccgaactaatcgtgaaagcagataactatctgaaaagcaaaaatgttatagcgaagataa<br/>         aagtttgcaaacactatttaccgtgggcgctatgactatctctgtctcagaatggtatagatt<br/>         tttaacaatattataggtggactgccagcgttcgccggccatgagaaaaatccaaggtctcaat<br/>         gaattcatcaatcaagagtccaanaagacagcgagctgaaaagtaagctgaaaaaccgtcacgc<br/>         gttcaaatggcggtaCTCACAAACAGATTCTATGCATTGCGGACACTAGCTATGAG</p> |
| CT_Cpf1_1 | <p>AAGCATTGGCCGTAAGTGCATTCCGAAAGGAGATATACatgaacaactacgacgaattcacca<br/>         aactgtaccgatccagaaaaccatccgttctgaactgaaaccgcagggtcgtaccatggaacac<br/>         ctggaaccttcaacttctcgaagaagaccgtgaccgtgcggaaaaatataaaaatcctgaaaga<br/>         agcgatcgacgaataccacaaaaattcatcgacgaacacctgaccaacatgtctctggactgga<br/>         actctctgaaacagatctctgaaaaatactacaaatctcgtgaagaaaaagacaaaaagtttct<br/>         ctgtctgaacagaaacgtatgcgtcaggaatcgtttctgaattcaaaaaagacgacctttcaa<br/>         agacctgttcttaaaaaactgttctctgaactgctgaaagaagaaatctacaaaaaggtaac<br/>         accaggaatcgacgcgctgaaatctttcgacaaatctctggttacttcatcgctcgcacgaa<br/>         aaccgtaaaaacatgtactctgacggtgacgaaatcaccgcgatctctaaccgtatcgttaacga<br/>         aaacttcccgaattcttgacaacctgcagaaataccaggaagcgcgtaaaaaataccggat<br/>         ggatcatcaaagcggatctgcgctggttgcgcacaacatcaaatggacgaagtttctctctg<br/>         gaatacttcaacaagttctgaaccaggaaggtatccagcgttacaacctggcgtgggtggtta<br/>         cgttaccaaatctggtgaaaaatgatgggtctgaacgacgcgctgaacctggcgcaccagctctg<br/>         aaaaatcttctaaagtcgtatccacatgaccccgCTCACAAACAGATTCTATGCATTGCGGAC<br/>         ACTAGCTATGAG</p>                                                                                                                                   |
| TX_Cpf1_1 | <p>AAGCATTGGCCGTAAGTGCATTCCGAAAGGAGATATACatgactaaaacatttgattcagagt<br/>         ttttaattgtactcgtcgaaaaaacggtacgctttgagttaaaaccgtgggagaaaccgcg<br/>         tcatttgtggaagactttaaaaacgagggttgaacggtgtgtgagcgaagatgaaaggcgagc<br/>         cgctgattaccagaaagtttaaggaataattgacgattaccatcgggatttcattgaagaaagt<br/>         taattatttccggaacaggtgagtaagatgctcttgagcagcgtttcatctttatcagaaa<br/>         ctgaaggcagcaaaagttaggaaagggaagcgcgctgaaagaatgggaagcgtgcagaaaaa<br/>         gctacgtgaaaaagtggtgaaatgcttctcggactcgaataaagcccgttctcaaggattgata<br/>         aaaaggaactgattaaggaagacctgataaattggttggtcgccagaatcgcgaggatgatatc<br/>         cctacggtcgaaacgtttaacaacttaccacatattttaccggcttccatgagaatcgtaaaaa<br/>         tatttactccaaagatgatcacgccaccgctattagctttcgcctattcatgaaaaatcttcaa<br/>         agtttttgacaacgtgattagcttcaataagttgaaagagggttccctgaattaaaatttgat<br/>         aaagtgaagaggatttagaagtagattatgatctgaagcatgcgtttgaaatagaatatttctg<br/>         taactcgtgaccaagcggcatagatcagtataattatctgttaggagggaacccctggagg<br/>         acgggacgaaaaacaaggatgaatgagcaaatatctgttcaacaacagcaaacgcgagat<br/>         aaagcgcgtcagattcccaaacgatcccCTCACAAACAGATTCTATGCATTGCGGACACTAG<br/>         CTATGAG</p>                                                                   |

|           |                                                                                                                                                                                                                                                                                                                                                                                                                                                                                                                                                                                                                                                                                                                                                                                                                                                                                                                                                                                                                                                                                                                                     |
|-----------|-------------------------------------------------------------------------------------------------------------------------------------------------------------------------------------------------------------------------------------------------------------------------------------------------------------------------------------------------------------------------------------------------------------------------------------------------------------------------------------------------------------------------------------------------------------------------------------------------------------------------------------------------------------------------------------------------------------------------------------------------------------------------------------------------------------------------------------------------------------------------------------------------------------------------------------------------------------------------------------------------------------------------------------------------------------------------------------------------------------------------------------|
| CA_Cpf1_1 | <p>AAGCATTGGCCGTAAGTGCATTCCGGAAAGGAGATATACatgcatacaggcggcttcttagta<br/> tggacgcgaaagagttcacaggtcagtatccgttgtcgaaaacattacgattcgaacttcggccc<br/> atcgccgcacgtgggataacctggaggcctcaggctacttagcgaagaccgccatcgtgccga<br/> atgttatcctcgtgcgaaagagttattggatgacaaccatcgtgccttctgaatcgtgtgtgc<br/> caciaatcgatatggattggcaccgattgvcggaggccttttgaaggtacataaaaacctggt<br/> aataaagaacttgcccaggattacaacctcagttgtcaaagcgcgtaaggagatcagcgcata<br/> tcttcaggatgcagatggctataaaggcctgttcgcgaagcccgcttagacgaagctatgaaaa<br/> ttgcgaaagaaaacgggaacgaaagtgatattgaggttctcgaagcgtttaacggttttagcgta<br/> tacttcaccggttatcatgagtcacgcgagaacatttatagcgatgaggatattggtgagcgtagc<br/> ctaccgaattactgaggataatttcccgcgctttgtctcaaagccttgatctttgataaattaa<br/> acgaaagccatccgatattatctctgaagatcgggcaatcttgagttgatgacattggtgaa<br/> tactttgacgtgtcgaactataacaattttcttcccaggccggtatagatgactacaatcacat<br/> tattggcggccatacaaccgaagacggactgatacaagcgttaaatgtcgtattgaaacttacgtc<br/> accaaaagaccctggctttgaaaaaattcagttcaaacagCTTCACAAACAGATTCTATGCATT<br/> GCGGACACTAGCTATGAG</p>                                                                                        |
| PC_Cpf1_1 | <p>AAGCATTGGCCGTAAGTGCATTCCGGAAAGGAGATATACatggatagtttgaaagatttcacca<br/> atctgtaccctgtcagtaagacattgagatttgaattaaagcccgttgaaagac ttagaaaat<br/> atcgagaagcaggtattttgaaagaggatgagcatcgtgcgaaagttatcggagggtgaagaa<br/> aataattgatacttatcataaggtatttatcgattcttctcttgaaaatatggctaaaatgggta<br/> ttgagaatgaaataaaagcaatgctccaaagttctgcgaattgtataaaaaagatcatcgcact<br/> gagggtgaagacaaggcattagataaaattcgagcagttctcgtggcctgattggtggggcttt<br/> cactggtgtttgvcggaagacgggaaaatacagtcctcaaacgagaagtagagagttggtcaaag<br/> aaaagttgataaaagaaattttacctgattttgtgctctctactgaggctgaaagcttgcccttc<br/> tctgttgaagaagctacgaggtcactgaaggagtttgatagctttacatcctactttgctggttt<br/> ttacgagaatagaaagaatataactcgcagaaacctcaatccactgccattgcttatcgtctta<br/> ttcatgagaacttgccgaagttcattgataaatcttggttttcagaagatcaaagagcctata<br/> gccaaagagctggaacataatcgtgaggactttctgcccgggggtacataaaaaaggatgagag<br/> attggaggatatttttctggtgaactattatccacgtttatctcaggctgggatcgaaaaat<br/> ataacgcattgattgggaagattgtgacagaaggagatggagagatgaaagggtcaatgaacac<br/> atcaacctttacaaccaaaagaggcagagaggatcggctccctcttttttaggcctCTTCACAA<br/> ACAGATTCTATGCATTGCGGACACTAGCTATGAG</p> |
| FB_Cpf1_1 | <p>AAGCATTGGCCGTAAGTGCATTCCGGAAAGGAGATATACatgaccaataaattcactaaccagt<br/> attctctctcctaagaccctgcgctttgaactgattccgcaggggaaaaccttgaggtcattcaa<br/> gaaaaaggcctcttgctcaggataaacagaggctgaatcttaccagaagaaatgaagaaaactat<br/> tgataagtttcataaatatttcattgatttagccttgcttaacgcaaatcactcacttgaaa<br/> cgtatctggagttatacaacaaatctgccgaaactaagaaagaacagaaat taaagacgatttg<br/> aaaaagtagcaggacaatctgcgtaaaagaaattgtcaaatcctcagtgacggcgatgctaaaag<br/> catttttgccattctggacaaaaaagagttgattactgtggaattagaaaagtggtttgaaaaca<br/> atgagcagaaagacatctacttcgatgagaaattcaaaacttcaccacctat tttacaggattt<br/> catcaaaaccggaagaacatgtactcagtagaacccaactccacggccattgcgtatcgtttgat<br/> ccatgagaatctgcctaaatttctggagaatgcgaaagcctttgaaaagattaagcaggtcgaat<br/> cgctgcaagtgaattttcgtgaactcatggcgaatttggtgacgaaggtcctaactctcgttaac<br/> gaactggaagaaatgtttcagattaacttacaatgacgtgctatcgagaacggatcacaaat<br/> ctacaatagattatctcagggttcacaaaaaacgatataaaatacaaaaggcctgaacgagtata<br/> tcaataactacaaccaaaagagcaaaaaggataggcttccgaaactgaagcagCTTCACAAA<br/> CAGATTCTATGCATTGCGGACACTAGCTATGAG</p>                                                                    |

|           |                                                                                                                                                                                                                                                                                                                                                                                                                                                                                                                                                                                                                                                                                                                                                                                                                                                                                                                                                                                                                                                                                                                         |
|-----------|-------------------------------------------------------------------------------------------------------------------------------------------------------------------------------------------------------------------------------------------------------------------------------------------------------------------------------------------------------------------------------------------------------------------------------------------------------------------------------------------------------------------------------------------------------------------------------------------------------------------------------------------------------------------------------------------------------------------------------------------------------------------------------------------------------------------------------------------------------------------------------------------------------------------------------------------------------------------------------------------------------------------------------------------------------------------------------------------------------------------------|
| CR_Cpf1_1 | <p>AAGCATTGGCCGTAAGTGCATTCCGAAAGGAGATATACatgtctttcgactctttaccaacc<br/> tgtactctctgtctaaaacctgaaattcgaatgcgtccggttgtaacaccagaaaatgctg<br/> gacaacgcgggtgttttcgaaaagacaaactgatccagaaaaatacggtaaaaccaaaccgta<br/> cttcgaccgtctgcaccgtgaattcatcgaagaagcgtgaccggtgttgaactgatcggctgg<br/> acgaaaacttccgtaccctggttgactggcagaaagacaaaaaaacaacgttgcgatgaaagcg<br/> tacgaaaactctctgcagcgtctgcgtaccgaaatcggtaaaatcttcaacctgaaagcggaaga<br/> ctgggttaaaaacaaatacccgatcctgggtctgaaaaacaaaaacaccgacatcctgttcgaag<br/> aagcggttttcggatcctgaaagcgcgttacgggtgaagaaaaagacaccttcatcgaagttgaa<br/> gaaatcgacaaaaccgtaaatctaaaatcaaccagatctctatcttcgactcttggaaaggttt<br/> caccggttacttcaaaaaattcttcgaaaccgtaaaaacttctacaaaaacgacggtacctcta<br/> ccgcatcgcgaccggtatcatcgaccagaacctgaaacgttcatcgacaacctgtctatcgtt<br/> gaatctgttcgtcagaaagttgacctggcggaaaccgaaaaatctttctctatctctctgtctca<br/> gttcttctctatcgacttctacaacaaatgcctgctgcaggacggtatcgactactacaacaaaa<br/> tcatcgggtggtgaaacctgaaaaacggtgaaaaactgatcggctctgaacgaactgatcaaccag<br/> taccgtcagaacaacaagaccagaaaaatcccgttcttcaaactgCTTCACAAACAGATTCTATG<br/> CATTGCGGACACTAGCTATGAG</p> |
| SC_Cpf1_1 | <p>AAGCATTGGCCGTAAGTGCATTCCGAAAGGAGATATACatgaccagttcgaagtttcacca<br/> acctgtaccaggtttctaaaacctgcgtttcgaactgatcccgcagggtaaaacctgaaacac<br/> atccaggaacagggtttcatcgaagaagacaaaagcgcgtaacgaccactacaagaactgaaacc<br/> gatcatcgaccgtatctacaaaacctacgcggaccagtgctgcagctggttcagctggactggg<br/> aaaacctgtctgcggcgtcactcttaccgtaaagaaaaaacgaagaacctgtaacgcgctg<br/> atcgaagaacaggcgacctaccgtaacgcgatccacgactacttcatcggctgtaccgacaacct<br/> gaccgacgcgatcaacaacgtcacgcggaatctacaaaggtctgttcaaagcggaactgttca<br/> acggtaaagttctgaaacagctgggtaccgttaccaccaccgaacacgaaaacgcgctgctgcgt<br/> tctttcgacaaattcaccacctacttctctggtttctacgaaaaccgtaaaaacgttttctctgc<br/> ggaagacatctctaccgcatcccgcaccgtatcgttcaggacaacttcccgaattcaaagaaa<br/> actgccacatcttaccgctctgatcaccgcggttccgctctctgcgtgaacacttcgaaaacggt<br/> aaaaaagcgtatcgttcttacctctatcgaagaagttttctctttccggtctacaa<br/> ccagctgctgaccagaccagatcgacctgtacaaccagctgctgggtggtatctctcgtgaag<br/> cgggtaccgaaaaaatcaaaggtctgaacgaagttctgaacctggcgatccagaaaaacgacgaa<br/> accgcgcacatcatcgcgtctctgcgcaccgttctcatcccgCTTCACAAACAGATTCTATGCAT<br/> TGCGGACACTAGCTATGAG</p>               |

|           |                                                                                                                                                                                                                                                                                                                                                                                                                                                                                                                                                                                                                                                                                                                                                                                                                                                                                                                                                                                                                                                                                                                                                                                                                                                                                                                                                                                                                                                                                                                                                                                                                                                                                                                                                                                                                                                  |
|-----------|--------------------------------------------------------------------------------------------------------------------------------------------------------------------------------------------------------------------------------------------------------------------------------------------------------------------------------------------------------------------------------------------------------------------------------------------------------------------------------------------------------------------------------------------------------------------------------------------------------------------------------------------------------------------------------------------------------------------------------------------------------------------------------------------------------------------------------------------------------------------------------------------------------------------------------------------------------------------------------------------------------------------------------------------------------------------------------------------------------------------------------------------------------------------------------------------------------------------------------------------------------------------------------------------------------------------------------------------------------------------------------------------------------------------------------------------------------------------------------------------------------------------------------------------------------------------------------------------------------------------------------------------------------------------------------------------------------------------------------------------------------------------------------------------------------------------------------------------------|
| SD_Cpf1_2 | AAGCATTGGCCGTAAGTGCATTCCGAAAGGAGATATACatgtcatcgctcacgaaattcacta<br>acaaatactcctaaacagctcaccattaagaatgaactcatcccagttggcaaaacactggagaac<br>atcaaagagaatggctctgatagatggcgacgaacagctgaatgagaattatcagaaggcgaaaat<br>tattgtggatgattttctgcgggacttcattaataaagcactgaataatacgcagatcggaact<br>ggcggaactggcggatgcccttaataaaggatgaagataacatcgagaaattgcaggataaa<br>attcggggaatcattgtatccaaatttgaacgtttgatctgttagcagctattctattaagaa<br>agatgaaaagattattgacgacgacaatgatgttgaagaagaggaactggatctgggcaagaaga<br>ccagctcatttaaatacatatataaaaaaacctgtttaagttagtgttgccatctacctgaaa<br>accacaaaccaggacaagctgaagattattagctcgtttgataatTTTTcaactacttccgcgg<br>gttctttgaaaaccgaaaaacatTTTTaccagaaccgatctccacaagtattgcgatcgc<br>ttgttcatgataacttccgaaattccttgataacattcgttgttttaatgtgtggcagacggaa<br>tgcccgaactaatcgtgaaagcagataactatctgaaaagcaaaaatggtatagcgaagataa<br>aagtttgcaaacatatttaccgtgggcgctatgactatttctgtctcagaatggatagatt<br>tttacaacaatattataggtggactgccagcgttcgccggccatgagaaaatccaaggtctcaat<br>gaattcatcaatcaagagtgccaaaaagacagcgagctgaaaagtaagctgaaaaccgtcacgc<br>gttcaaatggcggactgttcaaacagatactcagcgatcgtgaaaaagttttgtaattgatg<br>agttcgagtcggatgctcaagttattgacgccgttaaaaacttttacgccgaacagtcaaagat<br>aacaatgttatttttaacttattaatcttatcaagaatatcgtttcttaagtgtgacgaact<br>ggacggcatattcattgaagggaataactgtcagcgttagtcaaaaactctatagcgattggg<br>caaaattacgtaacgacattgaggattcggctaactctaaacaaggcaataaagagctggccaag<br>aagatcaaaaccaaaaaggggatgtagaaaagcgatctcgaatatgagttctcgtgtcgg<br>actgaaactcgattgtacatgataacaccaagtttctgacctcttagttgtacactgcataagg<br>tggttctgagaaactggggaaggtcaatgaaggcgactggccgaaacatctcaagaataatgaa<br>gagaaacaaaaaatcaaagagccgcttgatgctctgctggagatctataatacacttctgatttt<br>taactgcaaaagcttcaataaaaacggcaacttctatgtcgactatgatcgttgcatcaatgaac<br>tgagttcggctgtatctgtataataaaacacgtaactattgcactaaaAAACCGTACAGCAGC<br>AAAAAGATTAAATTGAACTTGG |
|-----------|--------------------------------------------------------------------------------------------------------------------------------------------------------------------------------------------------------------------------------------------------------------------------------------------------------------------------------------------------------------------------------------------------------------------------------------------------------------------------------------------------------------------------------------------------------------------------------------------------------------------------------------------------------------------------------------------------------------------------------------------------------------------------------------------------------------------------------------------------------------------------------------------------------------------------------------------------------------------------------------------------------------------------------------------------------------------------------------------------------------------------------------------------------------------------------------------------------------------------------------------------------------------------------------------------------------------------------------------------------------------------------------------------------------------------------------------------------------------------------------------------------------------------------------------------------------------------------------------------------------------------------------------------------------------------------------------------------------------------------------------------------------------------------------------------------------------------------------------------|

|           |                                                                                                                                                                                                                                                                                                                                                                                                                                                                                                                                                                                                                                                                                                                                                                                                                                                                                                                                                                                                                                                                                                                                                                                                                                                                                                                                                                                                                                                                                                                                                                                                                                                                                                                                |
|-----------|--------------------------------------------------------------------------------------------------------------------------------------------------------------------------------------------------------------------------------------------------------------------------------------------------------------------------------------------------------------------------------------------------------------------------------------------------------------------------------------------------------------------------------------------------------------------------------------------------------------------------------------------------------------------------------------------------------------------------------------------------------------------------------------------------------------------------------------------------------------------------------------------------------------------------------------------------------------------------------------------------------------------------------------------------------------------------------------------------------------------------------------------------------------------------------------------------------------------------------------------------------------------------------------------------------------------------------------------------------------------------------------------------------------------------------------------------------------------------------------------------------------------------------------------------------------------------------------------------------------------------------------------------------------------------------------------------------------------------------|
| CT_Cpf1_2 | AAGCATTGCCGTAAGTGCATTCCGAAAGGAGATATACatgaacaactacgacgaattcacca<br>aactgtaccgatccagaaaaccatccgtttcgaactgaaaccgcagggtcgtaccatggaacac<br>ctggaaaccttcaacttctcgaagaagaccgtgaccgtgcggaatacaaaatcctgaaaga<br>agcgatcgacgaataccacaaaaattcatcgacgaacacctgaccaacatgtctctggactgga<br>actctctgaaacagatctctgaaaaatactacaaatctcgtgaagaaaaagacaaaaagtttc<br>ctgtctgaacagaaacgtatgcgtcaggaatcgtttctgaattcaaaaaagacaccgtttcaa<br>agacctgttctctaaaaaactgttctctgaactgctgaaagaagaaatctacaaaaagtaacc<br>accagaaatcgacgcgtgaaatctttcgacaaatctctggttacttcatcggtctgcacgaa<br>aacgtaaaaacatgtactctgacggtgacgaaatcaccgcgatctctaaccgtatcgttaacga<br>aaactcccgaattcctggacaacctgcagaaataccaggaagcgcgtaaaaaataccggaat<br>ggatcatcaaagcgaatctgcgctggttgcgcacaacatcaaaatggacgaagtttctctctg<br>gaatacttcaacaaagttctgaaccaggaaggtatccagcgttacaacctggcgtgggtggtta<br>cgttaccaaactcgttgtaaaaaatgatgggtctgaacgacgcgtgaacctggcgcaccagtctg<br>aaaaatcttctaaagtcgtatccacatgaccccgctgttcaaacagatcctgtctgaaaaagaa<br>tctttctcttacatcccggacgttttcaccgaagactctcagctgctgccgtctatcggtggtt<br>cttcgcgcagatcgaaaacgacaagacggtaacatcttcgaccgtgcgctggaactgatctctt<br>cttacgcggaatacgacaccgaacgtatctacatccgtcaggcggacatcaaccgttttctaac<br>gttatcttcggtgaatgggtaccctgggtggtctgatgcgtgaatacaaagcggactctatcaa<br>cgacatcaacctggaacgtacctgcaaaaaagttgacaaatggctggactctaaagaattcgcgc<br>tgtctgacgttctggaagcgatcaaacgtaccggtaacacgacgcgttcaacgaatacatctct<br>aaaatgcgtaccgcgcgtgaaaaaatcgacgcggcgcgtaagaaatgaaattcatctctgaaaa<br>aatctctggtgacgaagaatctatccacatcatcaaaacctgctggactctgttcagcagttcc<br>tgcacttcttaacctgttcaaaagcgcgtcaggacatcccgtggacggtgcgttctacgcgga<br>ttcgacgaagttcactctaaactgttcgcgatcgttccgctgtacaacaaagttcgtaacctt<br>gaccaaAAACCGTACAGCACGAAAAAGATTAAATTGAACTTGG |
|-----------|--------------------------------------------------------------------------------------------------------------------------------------------------------------------------------------------------------------------------------------------------------------------------------------------------------------------------------------------------------------------------------------------------------------------------------------------------------------------------------------------------------------------------------------------------------------------------------------------------------------------------------------------------------------------------------------------------------------------------------------------------------------------------------------------------------------------------------------------------------------------------------------------------------------------------------------------------------------------------------------------------------------------------------------------------------------------------------------------------------------------------------------------------------------------------------------------------------------------------------------------------------------------------------------------------------------------------------------------------------------------------------------------------------------------------------------------------------------------------------------------------------------------------------------------------------------------------------------------------------------------------------------------------------------------------------------------------------------------------------|

|           |                                                                                                                                                                                                                                                                                                                                                                                                                                                                                                                                                                                                                                                                                                                                                                                                                                                                                                                                                                                                                                                                                                                                                                                                                                                                                                                                                                                                                                                                                                                                                                                                                                                                                                                                                                                                                                                                            |
|-----------|----------------------------------------------------------------------------------------------------------------------------------------------------------------------------------------------------------------------------------------------------------------------------------------------------------------------------------------------------------------------------------------------------------------------------------------------------------------------------------------------------------------------------------------------------------------------------------------------------------------------------------------------------------------------------------------------------------------------------------------------------------------------------------------------------------------------------------------------------------------------------------------------------------------------------------------------------------------------------------------------------------------------------------------------------------------------------------------------------------------------------------------------------------------------------------------------------------------------------------------------------------------------------------------------------------------------------------------------------------------------------------------------------------------------------------------------------------------------------------------------------------------------------------------------------------------------------------------------------------------------------------------------------------------------------------------------------------------------------------------------------------------------------------------------------------------------------------------------------------------------------|
| TX_Cpf1_2 | AAGCATTGCCGTAAGTGCATTCCGAAAGGAGATATACatgactaaaacatttgattcagagt<br>ttttaatttgactcgtgcaaaaaacggtacgctttgagttaaaccctgggagaaaccg<br>tcatttggaagactttaaaaacgaggcttgaaacgtgttgtagcgaagatgaaaggcgc<br>cgtcgattaccagaaagttaaggaaataattgacgattaccatcgggatttcattgaagaagt<br>taaattatccccggaacaggtgagtaaagatgctcttgagcaggcgtttcatcttatcagaaa<br>ctgaaggcagcaaaagttaggaaagggaaaaagcgtgaaagaatgggaagcgtgcagaaaa<br>gctacgtgaaaaagtggtaaatgcttctcggactcgaataaagcccgttctcaaggattgata<br>aaaaggaactgattaaggaagacctgataaattggttggtcgccagaatcgcgaggatgatatc<br>cctacggtcgaaacgtttaacaacttcaccacatattttaccggttccatgagaatcgtaaaaa<br>tatttactccaaagatgatcacgccaccgctattagctttcgccttattcatgaaaacttccaa<br>agtttttgacaacgtgattagcttcaataagttgaaagagggtttccctgaattaaaattgat<br>aaagtgaaagaggatttagaagtagattatgatctgaagcatgcgtttgaaatagaatattcgt<br>taactcgtgacccaagcggcatagatcagtataattatctgttaggagggaaaaccctggagg<br>acgggacgaaaaacaaggatgaatgagcaaatatctgttcaaacaacagcaaacgcgagat<br>aaagcgcgcagattcccaaacgatccccctgttcaaacagattcttagcgaaggactgaaag<br>ccagtcctttattcctaacaatttgaaagtgatcaggagttgttcgattcactgcagaagttac<br>ataataactgccaggataaattcaccgtgctgcaacaagccattctcggctcggcagaggcggat<br>cttaagaaggtcttcatcaaaacctctgatttaaatgccttatctaaccattttcgggaatta<br>cagcgtcttttcgatgcaactgaacctgtataaagaaagcctgaaaacgaaaaagcgcaggagg<br>cttttgaaaactaccggccattctattcacgacctcattcaatacttggaacagttcaattcc<br>agcctggacgcggaaaaacaacagagcaccgacaccgtcctgaactacttcatcaagaccgatga<br>attatattctcgttccattaaatccactagcaggccttccactcagggtgcagcctttgttcgaac<br>tggaagccctgtcatcctaagcgcgcccccaccggaatcggaagatgaaggggcaaaaggcaggaa<br>ggcttcgagcagatcaagcgtattaaagcttacctggatacgttatggaagcgggtacactttgc<br>aaagccgttgatcttgtaagggtcgtaaaatgatcgaagggtcgataaagaccagtcctttt<br>atgaagcgtttgaaatggcgtaccaagaacttgaatcgttaatcattcctatctataacaaagcg<br>cggagctatctgtcgcggAAACCGTACAGCACGAAAAAGATTAAATTGAACCTTGG |
|-----------|----------------------------------------------------------------------------------------------------------------------------------------------------------------------------------------------------------------------------------------------------------------------------------------------------------------------------------------------------------------------------------------------------------------------------------------------------------------------------------------------------------------------------------------------------------------------------------------------------------------------------------------------------------------------------------------------------------------------------------------------------------------------------------------------------------------------------------------------------------------------------------------------------------------------------------------------------------------------------------------------------------------------------------------------------------------------------------------------------------------------------------------------------------------------------------------------------------------------------------------------------------------------------------------------------------------------------------------------------------------------------------------------------------------------------------------------------------------------------------------------------------------------------------------------------------------------------------------------------------------------------------------------------------------------------------------------------------------------------------------------------------------------------------------------------------------------------------------------------------------------------|

CA\_Cpf1\_2

AAGCATTGCCGTAAGTGCATTCCGAAAGGAGATATACatgcatacaggcggcttcttagta  
tggacgcgaaagagttcacaggtcagtatccgttgtcgaaaacattacgattcgaacttcggccc  
atcgccgcacgtgggataacctggaggcctcaggctacttagcggaagaccgcatcgtgccga  
atgttatcctcgtgcgaaagagttattggatgacaaccatcgtgccttctgaatcgtgtgttc  
caciaatcgatatggattggcaccggattgcggaggccttttgaaggtacataaaaacctggt  
aataaagaacttgcccaggattacaaccttcagttgtcaaagcgcgtaaggagatcagcgcata  
tcttcaggatgcagatggctataaaggcctgttcgcaagcccgccttagacgaagctatgaaaa  
ttgcgaaagaaaacgggaacgaaagtgatattgaggttctcgaagcgtttaacggttttagcgta  
tacttcaccggttatcatgagtcacgcgagaacatttatagcgatgaggatatggtgagcgtagc  
ctaccgaattactgaggataatttcccgcgcttgtctcaaagccttgatctttgataaattaa  
acgaaagccatccggatattatctctgaagatcgggcaatcttgagttgatgacattggtaag  
tactttgacgtgtcgaactataacaattttcttcccaggccggtatagatgactacaatcacat  
tattggcggccatacaaccgaagacggactgatacaagcgttaatgtcgtattgaacttacgtc  
accaaaaagaccctggctttgaaaaaattcagttcaaacagctctacaaacaaatcctgagcgtg  
cgtaccagcaaaaagctacatcccgaacagtttgacaactc taaggagatggttgactgcattg  
cgattatgtcagcaaaaatagagaaatccgaacagtagaacgggccctgaaactagtccgtaata  
tcagttctttcgacttgcgaggatctttgtcaataaaaagaacttgcgcatactgagcaacaaa  
ctgataggagattgggacgcgatcgaaccgcattgatgcatagttcttcatcagaaaacgataa  
gaaaagcgtatatgatagcggaggcttttacgttgatgacatcttttcaagcgtgaaaaaat  
tttctgatgcctctgccgaagatattggcaacaggcgggaagacatctgtagagtataagtgag  
acggccccttttatcaacgatctgcgagcggaggacctggatagcctgaacgacgatggttatga  
agcggccgtctcaaaaatcgggagtcgctggagccttatatggatcttttccatgaactggaaa  
tttctcggttggcgatgagttcccaaatgcgcagcattttacagcgaactggaggaagtcagc  
gaacagctgatcgaattatccgttattcaacaaggcgcgcttcggtctgcaccggAAACCGTA  
CAGCACGAAAAAGATTAAATTGAACTTGG

|           |                                                                                                                                                                                                                                                                                                                                                                                                                                                                                                                                                                                                                                                                                                                                                                                                                                                                                                                                                                                                                                                                                                                                                                                                                                                                                                                                                                                                                                                                                                                                                                                                                                                                                                                                                                                                                                                                                                |
|-----------|------------------------------------------------------------------------------------------------------------------------------------------------------------------------------------------------------------------------------------------------------------------------------------------------------------------------------------------------------------------------------------------------------------------------------------------------------------------------------------------------------------------------------------------------------------------------------------------------------------------------------------------------------------------------------------------------------------------------------------------------------------------------------------------------------------------------------------------------------------------------------------------------------------------------------------------------------------------------------------------------------------------------------------------------------------------------------------------------------------------------------------------------------------------------------------------------------------------------------------------------------------------------------------------------------------------------------------------------------------------------------------------------------------------------------------------------------------------------------------------------------------------------------------------------------------------------------------------------------------------------------------------------------------------------------------------------------------------------------------------------------------------------------------------------------------------------------------------------------------------------------------------------|
| PC_Cpf1_2 | AAGCATTGGCCGTAAGTGCATTCCGAAAGGAGATATACatggatagtttgaagatttcacca<br>atctgtaccctgtcagtaagacattgagatttgaattaaagcccgttgaaagactttagaaaat<br>atcgaaaagcaggtatTTTgaaagaggatgagcatcgtgcagaaagtatcggagggtgaagaa<br>aataattgatacttatcataaggtatTTTatcgattcttctcttggaaaatatggctaaaatgggta<br>ttgagaatgaaataaaagcaatgctccaaagttctgcgaattgtataaaaaagatcatcgact<br>gagggtgaagacaaggcattagataaaattcgagcagtactcgtggcctgattgttggggctt<br>cactggtgtttgcggaagacgggaaaatacagtccaaaacgagaagtacgagagtttgttcaaag<br>aaaagttgataaaagaaatTTTactgattttgtgctctctactgaggctgaaagcttgctttc<br>tctgttgaagaagctacgaggtcactgaaggagtttgatagctttacatcctactttgctggtt<br>ttacgagaatagaaagaatatatactcgacgaaacctcaatccactgccattgcttatcgtctta<br>ttcatgagaacttgccgaagttcattgataatattcttgtttttcagaagatcaaagagcctata<br>gccaaagagctggaacataattcgtgcgacttttctgccgggggtacataaaaaaggatgagag<br>attggaggatatttttctgttgaactattatccacgtgttatctcaggctgggatcgaaaaat<br>ataacgcattgattgggaagattgtgacagaaggagatggagagatgaaagggctcaatgaacac<br>atcaacctttacaaccaaaaagaggcagagaggatcggtcctcttttttaggcctctttataa<br>acagatattgagtgcagagagcaattatcatacttgccctgagagttttgaaaaagatgaggagc<br>tcctcagggtcttaaaagagttctatgatcatatcgcagaagacattctcggactactcaacag<br>ttgatgacttctatttcagaatatgatttatctcgatatacgttaaggaacgatagccaattgac<br>tgatataatcaaaaaaatgttgggagattggaatgctatctacatggctagagaacgagcatatg<br>accacgagcaggctccaaaagaatcacggcgaatacagagaggacaggattaaagctcttaaa<br>ggagaagagagtataagtctggcaaatcttaatagttgtattgccttcttgacaatgttagaga<br>ttgccgtgtagatacttatctttccactgggccagaaggaaggaccacatggtctatctaate<br>tcgttgagaacgttttgcctataccatgaagcagagcaattgttgagctttccataccccgaa<br>gagaataatctgattcaggacaaggacaatgtggtgtaattaagaatcttctcgacaatatcag<br>tgatctgcagaggttcttgaacctctttggggtatgggagacgaaccgataaagatgaaagat<br>tttatggagagtataattatatccgaggagctctagatcaggtgatccctctgtacaataaggta<br>aggaactacctcactcgAAACCGTACAGCACGAAAAAGATTAAATTGAACTTTGG |
|-----------|------------------------------------------------------------------------------------------------------------------------------------------------------------------------------------------------------------------------------------------------------------------------------------------------------------------------------------------------------------------------------------------------------------------------------------------------------------------------------------------------------------------------------------------------------------------------------------------------------------------------------------------------------------------------------------------------------------------------------------------------------------------------------------------------------------------------------------------------------------------------------------------------------------------------------------------------------------------------------------------------------------------------------------------------------------------------------------------------------------------------------------------------------------------------------------------------------------------------------------------------------------------------------------------------------------------------------------------------------------------------------------------------------------------------------------------------------------------------------------------------------------------------------------------------------------------------------------------------------------------------------------------------------------------------------------------------------------------------------------------------------------------------------------------------------------------------------------------------------------------------------------------------|



FB\_Cpf1\_2

AAGCATTGGCCGTAAGTGCATTCCGAAAGGAGATATACatgaccaataaattcactaaccagt  
attctctctctaagacctgcgctttgaactgattccgcaggggaaaaccttggagttcattcaa  
gaaaaaggcctcttgtctcaggataaacagagggtgaatcttaccaagaaatgaagaaaactat  
tgataagtttcataaatatttcattgatttagccttgtctaacgcaaattaactcacttgaaa  
cgtatctggagttatacaacaaatctgccgaaactaagaaagaacagaaatftaaagacgatttg  
aaaaaagtacaggacaatctgcgtaaagaaattgtcaaatecttcagtgcggcgatgctaaaag  
catttttgccattctggacaaaaaagagttgattactgtggaattagaaaagtggttgaaaaca  
atgagcagaaagacatctacttcgatgagaaattcaaaactttcaccacctattttacaggattt  
catcaaaaccggaagaacatgtactcagtagaacggaactccacggcatttgcgtatcgtttgat  
ccatgagaatctgcctaaatcttctggagaatgcgaaagcctttgaaaagattaagcaggtcgaat  
cgctgcaagtgaatcttctgtaactcatggcgaaatcttggtgacgaaggtctaactctcgtaa  
gaactggaagaaatgttccagattaattactacaatgacgtgctatcgcagaacggtatcacaat  
ctacaatagtattatctcagggttcacaaaaacgatataaaatacaaaggcctgaacgagtata  
tcaataactacaaccaacaaaggacaaaaaggataggcttccgaaactgaagcagttatacaaa  
cagattttatctgacagaatctccctgagcttctgcccggatgctttcactgatgggaagcaggt  
tctgaaaagcattttcgatttttataagattaacttactgagctacacgattgaaggtcaagaag  
aatctcaaaacttactgctcttgatccgtcaaacattgaaaatctatcatcgttcgatacgcag  
aaaatctacctcaaaaacgatactcacctgactacgatctctcagcaggttttcggggattttag  
tgtattttcaacagctctgaactactggatgaaaccaaagtcaatccgaaatcgcagacggaat  
attctaaggccaacgaaaaaaaaacgtgagattcttgataaagctaaagccgtatttactaaacag  
gattacttttctattgctttcctgcaggaagttttatcggagtatatcctgacctggatcatac  
atctgatatcgttaaaaaacacagcagcaattgcatcgctgactatttcaaaaaccactttgtcg  
caaaaaagaaaacgaaacagacaagactttcgatttcattgctaaccatcaccgcaaaataccag  
tgtattcagggtatcttgaaaacgccaccaatacgaagacgaactgaacaagatcagaagct  
gatcgataatftaaaattcttcttagatgcaatcctggagctgctgcacttcatcaaacgcttc  
atftaaagagcaggtccattaccgaaaaggacaccgccttctatgacgttttgaaaattattat  
gaagccctctccttgctgactccgctgtataatatggttacgcaattacgtaaccagAAACCGTA  
CAGCACGAAAAAGATTAAATTGAACCTTGG

CR\_Cpf1\_2

AAGCATTGGCCGTAAGTGCATTCCGAAAGGAGATATACatgtctttcgactctttaccaacc  
tgtactctctgtctaaaacctgaaattcgaatgcgtccggttggtaacaccagaaaatgctg  
gacaacgcgggtgttttcgaaaagacaaactgatccagaaaaatacggtaaaaccaaaccgta  
cttcgaccgtctgcaccgtgaattcatcgaagaagcgtgaccggtgttgaactgatcggctgg  
acgaaaaacttcgtaccctggttgactggcagaagacaaaaaaaaacaacgttgcgatgaaagc  
tacgaaaactctctgcagcgtctgcgtaccgaaatcggtaaaatcttcaacctgaaagcgaaga  
ctgggttaaaaacaaataccgatcctgggtctgaaaaacaaaacaccgacatcctgttcgaag  
aagcggttttcggatcctgaaagcgcgttacgggaagaaaaagacaccttcatcgaagttgaa  
gaaatcgacaaaaccggtaaatctaaaatcaaccagatctctatcttcgactcttggaaagttt  
caccggttacttcaaaaaatcttcgaaaccgtaaaaacttctacaaaaacgacggtaacctta  
ccgcatcgcgaccggtatcatcgaccagaacctgaaacgttcatcgacaacctgtctatcgtt  
gaatctgttcgctcagaaagttgacctggcggaaaccgaaaaatcttctctatctctctgtctca  
gttctctctatcgacttctacaacaaatgcctgctgcaggacggatcgactactacaacaaaa  
tcacggtggtgaaacctgaaaaacggtaaaaactgatcggctgtaacgaactgatcaaccag  
taccgtcagaacaacaagaccagaaaatccggttcttcaaactgctggacaacagatcctgtc  
tgaaaaatcctgttcttgacgaaatcaaaaacgacaccgaactgatcgaagcgtgtctcagt  
tcgcgaaaaccgcggaagaaaaaacaaaatcgtaaaaaactgttcgcggacttcgttgaaaa  
aacttcaaatacgacctggcgcagatctacatctctcaggaagcgttcaacacctctctaaca  
atggacctctgaaaccgaaaccttcgcgaaatacctgttcgaagcgatgaaatctggtaaacgg  
cgaatacgaaaaaaaagacaactcttacaattcccggacttcatcgcgctgtctcagatgaaa  
tctgcgctgtgtctatctctctggaaggtcacttctggaagaaaaatactacaaaatctctaa  
attcaggaaaaaaccaactgggaacagttcctggcgtcttctgtacgaattcaactctctgt  
tctctgacaaaatcaacaccaaagacggtaaaccaaacaggttggttactacctgttcgcgaaa  
gacctgcacaacctgatcctgtctgaacagatcgacatcccgaagactctaaagtaccatcaa  
agacttcgcggactctgttctgaccatctaccagatggcgaatacttcgcggttgaaaaaac  
gtgctgggtggcgaatacgaactggactcttctacaccagccggacaccggttacctgcag  
ttctacgacaacgcgtacgaagacatcgttcaggtttacaacaactgcgtaactacctgaccaa  
aAAACCGTACAGCACGAAAAAGATTAATGAACTTTGG

|           |                                                                                                                                                                                                                                                                                                                                                                                                                                                                                                                                                                                                                                                                                                                                                                                                                                                                                                                                                                                                                                                                                                                                                                                                                                                                                                                                                                                                                                                                                                                                                                                                                                                                                                                                                               |
|-----------|---------------------------------------------------------------------------------------------------------------------------------------------------------------------------------------------------------------------------------------------------------------------------------------------------------------------------------------------------------------------------------------------------------------------------------------------------------------------------------------------------------------------------------------------------------------------------------------------------------------------------------------------------------------------------------------------------------------------------------------------------------------------------------------------------------------------------------------------------------------------------------------------------------------------------------------------------------------------------------------------------------------------------------------------------------------------------------------------------------------------------------------------------------------------------------------------------------------------------------------------------------------------------------------------------------------------------------------------------------------------------------------------------------------------------------------------------------------------------------------------------------------------------------------------------------------------------------------------------------------------------------------------------------------------------------------------------------------------------------------------------------------|
| SC_Cpf1_2 | AAGCATTGCCGTAAGTGCATTCCGAAAGGAGATATACatgaccagttcgaagtttcacca<br>acctgtaccagtttctaaaacctgctgttcgaactgatcccgcagggtaaaacctgaaacac<br>atccaggaacagggttctatcgaagaagacaaaagcgcgtaacgaccactacaaagaactgaaacc<br>gatcatcgaccgtatctacaaaacctacgcggaccagtgcctgcagctggttcagctggactggg<br>aaaacctgtctgcgcgatcgactcttaccgtaaagaaaaaccgaagaacctgtaacgcgctg<br>atcgaagaacaggcgacctaccgtaacgcgatccacgactactcatcggtcgtaccgacaacct<br>gaccgacgcgatcaacaaacgtcacgcggaaatctacaaaggctgttcaaagcggaactgttca<br>acggtaaagtctgaaacagctgggtaccgttaccaccaccgaacacgaaaacgcgctgctgcgt<br>tctttcgacaaattcaccacacttctctggtttctacgaaaaccgtaaaaacgtttctctg<br>ggaagacatctctaccgcatcccgcaccgtatcggtcaggacaacttcccgaattcaaagaaa<br>actgccacatcttaccgctgcatcaccggttccgctctctgctgaaacttcgaaaacgtt<br>aaaaaagcgatcggtatctctggtttctacctctatcgaagaagtttctctttccggtctaca<br>ccagctgctgaccagaccagatcgacctgtacaaccagctgctgggtggtatctctcgtgaag<br>cgggtaccgaaaaatcaaaggtctgaacgaagttctgaacctggcgatccagaaaaacgacgaa<br>accgcgcacatcategctctctgcccaccgtttcatcccgtgttcaaacagatcctgtctga<br>ccgtaacacctgtctttcatcctggaagaattcaaatctgacgaagaagtatccagctcttct<br>gcaaatacaaaacctgctgctgtaacgaaaacgttctggaaccgcggaagcgtgttcaacgaa<br>ctgaactctatcgacctgaccacatcttcatctctcacaaaaaactgaaacctctctctg<br>gctgtgcgaccactgggacacctgctgtaacgcgctgtacgaacgctgatatctctgaactgacc<br>gtaaaatcaccaaatctgcgaaagaaaaagttcagcgttctctgaaacacgaagacatcaacctg<br>caggaaatcatctctgcgcggttaagaactgtctgaagcgttcaaacagaaaacctctgaaat<br>cctgtctcacgcgcacgcggcgtggaccagccgtgccgaccacctgaaaaaacaggaagaaa<br>aagaaatcctgaaatctcagctggactctctgctgggtctgtaccacctgctggactggttcg<br>ggtgacgaatctaacgaagttgaccgggaattctctgctgctgaccggatcaactggaaat<br>ggaaccgtctctgtctttctacaacaaagcgcgtaactacgcgacaaaAAACCGTACAGCACGA<br>AAAAGATTAAATTGAACTTGG |
|-----------|---------------------------------------------------------------------------------------------------------------------------------------------------------------------------------------------------------------------------------------------------------------------------------------------------------------------------------------------------------------------------------------------------------------------------------------------------------------------------------------------------------------------------------------------------------------------------------------------------------------------------------------------------------------------------------------------------------------------------------------------------------------------------------------------------------------------------------------------------------------------------------------------------------------------------------------------------------------------------------------------------------------------------------------------------------------------------------------------------------------------------------------------------------------------------------------------------------------------------------------------------------------------------------------------------------------------------------------------------------------------------------------------------------------------------------------------------------------------------------------------------------------------------------------------------------------------------------------------------------------------------------------------------------------------------------------------------------------------------------------------------------------|

SD\_Cpf1\_3

AAGCATTGGCCGTAAGTGCATTCCGAAAGGAGATATACatgtcatcgctcacgaaattcacta  
acaaatactctaaacagctcaccattaagaatgaactcatcccagttggcaaaacactggagaac  
atcaaagagaatggtctgatagatggcgacgaacagctgaatgagaattatcagaaggcgaaaat  
tatttggatgattttctgcgggacttcattaataaagcactgaataatacgagatcgggaaact  
ggcgcgaactggcggatgcccttaataaaggatgaagataacatcgagaaattgcaggataaa  
attcggggaatcattgtatccaaatgtgaaacgtttgatctgttagcagctattctattaagaa  
agatgaaaagattattgacgacgacaatgatgttgaagaagaggaactggatctgggcaagaaga  
ccagctcatttaatacatatttaaaaaaacctgtttaagtagtgttgccatcctacctgaaa  
accacaaccaggacaagctgaagattattagctcgtttgataatttttcaacgtacttccgcg  
gttctttgaaaaccggaaaaacatttttaccagaaccgatctccacaagtattgcgatcgc  
ttgttcatgataacttcccgaatttcttgataacattcgttgttttaatgtgtggcagacggaa  
tgcccgaactaatcgtgaaagcagataactatctgaaaagcaaaaatgttatagcgaaagataa  
aagtttgcaaacattttaccgtgggcgctatgactatttctgtctcagaatggtatagatt  
tttacaacaatattataggtggactgccagcgttcgccggccatgagaaaaatccaaggtctcaat  
gaattcatcaatcaagagtgccaaaaagacagcgagctgaaaagtaagctgaaaaaccgtcacgc  
gttcaaatggcggactgttcaaacagatactcagcgatcgtgaaaaagttttgtaattgatg  
agttcgagtcggatgctcaagttattgacgccgttaaaaaacttttacgccgaacagtcaaaagat  
aacaatgttatttttaactattaaatcttatcaagaatcgcctttttaaagtgatgacgaact  
ggacggcatattcattgaagggaataacctgtcgagcgttagtcaaaaactctatagcgattggt  
caaaattacgtaacgacattgaggattcggctaactcctaacaaggcaataaagagctggccaag  
aagatcaaaaccaacaagggatgtagaaaagcgatctcgaatatgagttctcgtgtcgga  
actgaaactgattgtacatgataacaccaagttttctgacctccttagttgtacactgcataagg  
tggtctctgagaaactggtgaaggtcaatgaaggcgactggccgaaacatctcaagaataatgaa  
gagaacaaaaaatcaaagaccgcttgatgctctgctggagatctataatacacttctgatttt  
taactgaaaagcttcaataaaaacggcaacttctatgtcgactatgatcgttgcatcaatgaac  
tgagttcggctgtgtatctgtataataaacacgtaactattgcactaaaaaacctataacacg  
gacaagttcaaacctcaattttaacagtcgcgagctcggatgaaggcttttccaagtcgaaagaaa  
tgactgtctgactctttgtttaaaaagacgacaactattatgtaggcattatccgaaaggtg  
caaaaatcaattttgatgatacacaagcaatcgccgataacaccgacaattgcatctttaaagt

CT\_Cpf1\_3

AAGCATTGGCCGTAAGTGCATTCGGAAAGGAGATATACatgaacaactacgacgaattcacca  
aactgtaccgatccagaaaaccatccgtttcgaactgaaaccgcagggtcgtaccatggaacac  
ctggaaaccttcaacttctcgaagaagaccgtgaccgtgcggaaaaatacaaaatcctgaaaga  
agcgatcgacgaataccacaaaaattcatcgacgaacacctgaccaacatgtctctggactgga  
actctctgaaacagatcctgaaaaatactacaaatctcgtgaagaaaaagacaaaaagtttcc  
ctgtctgaacagaaacgtatgcgtcaggaatcgtttctgaattcaaaaaagacgaccgtttcaa  
agacctgttctctaaaaaactgttctctgaactgctgaaagaagaaatctacaaaaaggtaac  
accaggaatcgacgcgctgaaatctttcgacaaatctctggttacttcatcggtctgcacgaa  
aacgtaaaaacatgtactctgacggtgacgaaatcaccgcgatctctaaccgtatcgttaacga  
aaactcccgaattcctggacaacctgcagaaataccaggaagcgcgtaaaaaataccggat  
ggatcatcaaagcggaatctgcgctggttgcgcacaacatcaaaatggacgaagtttctctctg  
gaatacttcaaaaagttctgaaccaggaaggtatccagcgttacaacctggcgcgggtggtta  
cgttaccaaactggtgaaaaatgatgggtctgaacgacgcgctgaacctggcgcaccagctcg  
aaaaatcttctaaaggtcgtatccacatgaccccgctgttcaaacagatcctgtctgaaaaagaa  
tctttctcttacatcccggacgttttaccgaagactctcagctgctgccgtctatcggtggtt  
cttcgcgcagatcgaaaacgacaaagacggtaacatcttcgaccgtgcgctggaactgatctctt  
cttacgcggaatacgacaccgaacgtatctacatccgtcagcggacatcaaccgttttctaac  
gttatcttcggtgaatgggtaccctgggtggtctgatgcgtgaatacaaagcggactctatcaa  
cgacatcaacctggaacgtacctgcaaaaaagttgacaaatggctggactctaaagaattcgcgc  
tgtctgacgttctggaagcgatcaaacgtaccggtacaacgacgcgttcaacgaatacatctct  
aaaatgcgtaccgcgctgaaaaaatcgacgcggcgcgtaagaaatgaaattcatctctgaaaa  
aatctctggtgacgaagaatctatccacatcatcaaaacctgctggactctgttcagcagttcc  
tgcacttcttcaacctgttcaagcgcgctcaggacatcccgtggacggtgcgttctacgcgga  
ttcgacgaagttcactctaaactgttcgcgatcgttccgctgtacaacaaagttcgttaactacct  
gacaaaaacaacctgaacaccaaaaaaatcaaacgaaactcaaaaacccgaccctggcgaacg  
gttgggaccagaacaaagtttacgactacgcgtctctgatcttctgcgtgacggtaactactac  
ctgggtatcatcaaccgaaacgtaaaaaaacatcaaatcgaacagggttctggtaacggctcc  
gttctaccgtaaaatggtttacaacagatcccgggtccgaacaaaaacctgccgcgtgttttcc  
tgacctctaccaaaggtaaaaaagaatacaaacctctaaagaaatcatcgaaggttacgaagcg

TX\_Cpf1\_3

AAGCATTTGCCGTAAGTTCGATTCCGAAAGGAGATATACatgactaaaacatttgattcagagt  
tnttaatttgactcgtgcaaaaaacggtacgctttgagttaaaaccgtgggagaaaaccg  
tcatttggaagactttaaaaacgagggttgaaacgtgtgtgagcgaagatgaaaggcgagc  
cgtcgattaccagaaagttaaggaataattgacgattaccatcgggatttcattgaagaaagt  
taaattatnttccggaacaggtgagtaaagatgctcttgagcaggcgtttcatctttatcagaaa  
ctgaaggcagcaaaagttgaggaaagggaagcgtgaaagaatgggaagcgtgcagaaaa  
gctacgtgaaaaagtggtgaaatgcttctcggactcgaataaagcccgttctcaaggattgata  
aaaaggaactgattaaggaagacctgataaattggttggtcggccagaatcgcgaggatgatatac  
cctacggtcgaaacgtttaacaacttcaccacatattttaccggcttccatgagaatcgtaaaaa  
tatttactccaaagatgatcacgccaccgctattagctttcgccttattcatgaaaaatcttcaa  
agtttttgacaacgtgatttagcttcaataagttgaaagagggtttccctgaattaaaatttgat  
aaagtgaaagaggatttagaagtagattatgatctgaagcatgcgtttgaaatagaatatttctg  
taactcgtgaccaagcggcatagatcagtataattatctgttaggagggaacccctggagg  
acgggacgaaaaacaagggatgaatgagcaaatatctgttcaaacaacagcaaacgcgagat  
aaagcgcgtcagattcccaaacgatccccctgttcaaacagattcttagcgaaaggactgaaag  
ccagtcctttattcctaacaatttgaaagtgatcaggagttgttcgattcactgcagaagttac  
ataataactgccaggataaattcacctgctgcaacaagccattctcggctcggcagaggcgat  
cttaagaaggtcttcatcaaaacctctgatttaaatgccttatctaacaccattttcgggaatta  
cagcgtcttttccgatgcaactgataaaagaaagcctgaaaacgaaaaaagcgcaggagg  
cttttgaaaactaccggccattctattcacacctcattcaatacttgaacagttcaattcc  
agcctggacgcggaaaaacaacagagcaccgacaccgtcctgaactacttcatcaagaccgatga  
attatattctcgttcttaaatccactagcaggccttctactcaggcgcagcctttgttcgaac  
tggaagccctgtcatctaagcgcgccaccggaatcggaagatgaaggggcaaaaggcgaggaa  
ggcttcgagcagatcaagcgtattaaagcttacctggatacgttatggaagcgtacactttgc  
aaagccgttgatcttggtaagggtcgtaaaatgatcgaagggtcgataaagaccagtcctttt  
atgaagcgtttgaaatggcgtaccaagaactgaaatcgttaatcattcctatctataacaaagc  
cggagctatctgtcgcggaaacctttcaaggccgataaattcaagattaatnttgacaacaacac  
gctactgagcggatgggatgcaacaaggaactgctaacgcgtccattctgtttaagaaagacg  
ggttatattaccttggaattatgccgaaaggaagacctttctctttgactactttgtatcgagc

CA\_Cpf1\_3

AAGCATGGCCGTAAGTGGGATTCGGAAAGGAGATATACatgcatacaggcggctctcttagta  
tggacgcgaaagagttcacaggtcagtatccgttgtcgaaaacattacgattcgaacttcggccc  
atcgccgcacgtgggataaacctggaggcctcaggctacttagcggagaccgccatcgtgccga  
atgttatcctcgtgcgaaagagttattggatgacaaccatcgtgccttcctgaatcgtgtgtgc  
caciaatcgatatggattggcaccgatttgcggaggccttttgaaggtacataaaaacctggt  
aataaagaacttggccaggattacaaccttcagttgtcaaagcgcgtaaggagatcagcgcata  
tcttcaggatgcagatggctataaaggcctgttcgcaagccccttagacgaagctatgaaaa  
ttgcgaaagaaaacgggaacgaaagtgatattgaggttctcgaagcgtttaacggttttagcgta  
tacttcaccggttatcatgagtcacgcgagaacatttatagcgaatgaggatattggtgagcgtagc  
ctaccgaattactgaggataatttcccgcgctttgtctcaaacgctttgatctttgataaattaa  
acgaaagccatccgatattatctctgaagatcgggcaatcttgagttgatgacattggtaag  
tactttgacgtgtcgaactataacaatttcttcccaggccggtatagatgactacaatcacat  
tattggcggccatacaaccgaagacggactgatacaagcgtttaatgtcgtattgaacttacgtc  
accaaaaagaccctggctttgaaaaattcagttcaaacagctctacaacaatctgagcgtg  
cgtaccagcaaaagctacatcccgaacagtttgacaactctaaggagatggttgactgcatttg  
cgattatgtcagcaaaatagagaaatccgaacagtagaacggccctgaaactagtcgtaata  
tcagttctttcgacttgcgcgggatctttgtcaataaaaagaacttgcgcatactgagcaacaaa  
ctgataggagattgggacgcgatcgaaaccgattgatgcatagttcttcatcagaaaacgataa  
gaaaagcgtatatgatagcgcggaggcttttacgttggatgacatctttcaagcgtgaaaaaat  
tttctgatgcctctgccgaagatattggcaacaggcgggaagacatctgttagagtataaagtga  
acggcccttttatcaacgatctgcgagcgtggacctggatagcctgaacgacgatggttatga  
agcggccgtctcaaaaattcgggagtcgctggagccttatatggatcttttccatgaactggaaa  
tttctcggttggcgatgagttccaaaatgcccagcattttacagcgaactggaggaagtgcg  
gaacagctgatcgaaattattccgttattcaacaaggcgcgcttcttctgcaccggaaacgcta  
tagcaccgataagattaaagtgaacttaaaatcccgcaccttggcggacgggtggacctgaaca  
aagagagagacaacaaagccgcgattctgcggaaagacggtaagtattatctggcaattctggat  
atgaagaaagatctgtcaagcattaggaccagcgcgaagatgaatccagcttcgaaaagatgga  
gtataaactggtaccgagtcagtaaaaatgctgccaaagatattcgtaaaatcgaaagccgcta  
aggaaaaatattggcctgacagatcgtatgcttgaatgctacgataaagggtatgcataagtcgggt

PC\_Cpf1\_3

AAGCATTTGGCCGTAAGTGCATTCGGAAAGGAGATATACatggatagtttgaaagatttcacca  
atctgtaccctgtcagtaagacattgagatttgaattaaagcccgttgaaagactttagaaaat  
atcgaaaagcaggtatTTTTGAAAGAGGATGAGCATCGTGCAGAAAGTTATCGGAGGGTGAAGAA  
aataattgatacttatcataaggtatTTTATCGATTCTTCTCTTGAAAATATGGCTAAAATGGGTA  
TTGAGAAATGAAATAAAGCAATGCTCCAAGTTCTGCGAATTGTATAAAAAAGATCATCGCACT  
GAGGGTGAAGACAAGGCATTAGATAAAATTCGAGCAGTACTTCGTGGCCTGATTGTTGGGGCTTT  
CACTGGTGTTCGCGAAGACGGGAAAATACAGTCCAAAACGAGAAGTACGAGAGTTTGTCAAAG  
AAAAGTTGATAAAAGAAATTTACCTGATTTGTGCTCTCTACTGAGGCTGAAAGCTTGCCTTTCT  
CTGTTGAAGAAGCTACGAGGTCACTGAAGGAGTTTGATAGCTTACATCCTACTTTGCTGGTTT  
TTACGAGAAATAGAAAGAATATATACTCGACGAAACCTCAATCCACTGCCATTGCTTATCGTCTTA  
TTCAATGAGAAGTTGCCGAAGTTCATTGATAATATCTTGTTTTTTCAGAAGATCAAAGAGCCTATA  
GCCAAAGAGCTGGAACATATTCGTGCGGACTTTTCTGCCGGGGGTACATAAAAAAGGATGAGAG  
ATTGGAGGATATTTTTCTGTTGAAGTATTATATCCACGTGTATCTCAGGCTGGGATCGAAAAAT  
ATAACGATTGATTGGGAAGATTGTGACAGAAGGAGATGGAGAGATGAAAGGGCTCAATGAACAC  
ATCAACCTTTACAACCAACAAGAGGCAGAGAGGATCGGCTCCCTCTTTTTAGGCCCTTTATAA  
ACAGATATTGAGTGACAGAGAGCAATTATCATACTTGCCCTGAGAGTTTTGAAAAGATGAGGAGC  
TCTCAGGGCTCTAAAAGAGTTCATGATCATATCGCAGAAGACATTCCTCGGACGTACTCAACAG  
TTGATGACTTCTATTTGAGAAATGATTTATCTCGGATATACGTAAGGAACGATAGCCAATTGAC  
TGATATATCAAAAAAATGTTGGGAGATTGGAATGCTATCTACATGGCTAGAGAACGAGCATATG  
ACCACGAGCAGGCTCCAAAAGAATCACGGCGAAATACGAGAGGGACAGGATTAAGCTCTTAAA  
GGAGAAGAGAGTATAAGTCTGGCAAATCTTAATAGTTGTATTGCCTTCTGGACAATGTTAGAGA  
TTGCCGTGTAGATACTTATCTTCCACACTGGGCCAGAAGGAAGGACCACATGGTCTATCTAATC  
TCGTTGAGAACGTTTTTGCCTACATCATGAAGCAGAGCAATTGTTGAGCTTTCATACCCCGAA  
GAGAATAATCTGATTCAGGACAAGGACAATGGTGTTAATTAAGAATCTTCTCGACAATATCAG  
TGATCTGCAGAGGTTCTTGAAACCTCTTTGGGGTATGGGAGACGAACCCGATAAAGATGAAAGAT  
TTTATGGAGAGTATAATTATATCCGAGGAGCTCTAGATCAGGTGATCCCTCTGTACAATAAGGTA  
AGGAACCTCACTCGGAAGCCTTATTCGACCAGAAAAGTAAAACCTCAATTTTGGGAATCTCA  
ATTGCTTAGTGGTTGGGATAGAAATAAGGAAAAGGATAATAGCTGTGTGATTTTGCGTAAGGGGC  
AGAACCTCTATTTGGCTATTATGAACAATAGGCACAAAAGAAGTTTCGAAAACAAGGTGTTGCC



FB\_Cpf1\_3

AAGCATGGCCGTAAGTGGGATTCGGAAAGGAGATATACatgaccaataaattcactaaccagt  
attctctctctaagacctgcgctttgaactgattccgcaggggaaaaccttggagttcattcaa  
gaaaaaggcctcttgtctcaggataaacagaggctgaatcttaccaagaaatgaagaaaactat  
tgataagtttcataaatatttcattgatttagccttgtctaacgcaaattaactcacttggaaa  
cgtatctggagttatacaacaaatctgccgaaactaagaaagaacagaaatftaaagacgattg  
aaaaaagtacaggacaatctgcgtaaagaaattgtcaaatccttcagtgcggcgatgctaaaag  
catttttgcattctggacaaaaaagagttgattactgtggaattagaaaagtggtttgaaaaca  
atgagcagaagacatctacttcgatgagaaattcaaaacttccaccacctattttacaggattt  
catcaaaaccggaagaacatgtactcagtagaacggaactccacggccattgcgatatcgtttgat  
ccatgagaatctgcctaaatctctggagaatgcgaaagcctttgaaaagattaagcaggtcgaat  
cgctgcaagtgaatctctgtaactcatgggcgaatcttggtgacgaaggtctaactctcgttaac  
gaactggaagaaatgtttcagattaattactacaatgacgtgctatcgcagaacggtatcacaat  
ctacaatagattatctcagggttcacaaaaacgatataaaatacaaaggcctgaacgagtata  
tcaataactacaaccaaaacaaggacaaaaaggataggcttccgaaactgaagcagttatacaaa  
cagattttatctgacagaatctccctgagctttctgccggatgctttcactgatgggaagcaggt  
tctgaaagcgattttcgatttttataagattaacttactgagctacacgattgaaggtcaagaag  
aatctcaaaacttactgctcttgatccgtcaaaccattgaaaatctatcatcgttcgatacgcag  
aaaatctacctcaaaaacgatactcactgactacgatctctcagcaggttttcggggattttag  
tgtattttcaacagctctgaactactggtatgaaaccaaagtcaatccgaaattcgagacggaat  
attctaaggccaacgaaaaaaacgtgagattcttgataaagctaaagccgtatttactaaacag  
gattacttttctattgctttctcgcaggaagttttatcggagtatactctgacctggatcatac  
atctgatatcgttaaaaaacacagcagcaattgcategctgactatttcaaaaaccactttgtcg  
ccaaaaaagaaaacgaaacagacaagactttcgatttcattgctaacatcaccgcaaaataccag  
tgtattcagggtatcttgaaaaacgccgaccaatacgaagacgaactgaacaagatcagaagct  
gatcgataatftaaaattcttcttagatgcaatcctggagctgctgcacttcatcaaacgcttc  
atftaaagagcgagtcattaccgaaaaggacaccgcttctatgacgttttgaaaattattat  
gaagccctctccttgcgactccgctgtataatattggtacgcaattacgtaaccagaaaccata  
ttctaccgaaaaaattaaactgaactttgaaaacgcacagctgctcaacggttgggacgcaata  
aagaagtgactacctcaccaccatcctgaaaaagatggtaactatfttctggcaattatggat

CR\_Cpf1\_3

AAGCATGGCCGTAAGTGGATTCCGAAAGGAGATATACatgtctttcgactctttccaacc  
tgtactctctgtctaaaacctgaaattcgaatgcgtccggttgtaaacaccagaaaatgctg  
gacaacgcgggtgttttcgaaaaagacaaactgatccagaaaaatacggtaaaaccaaaccgta  
cttcgaccgtctgcaccgtgaattcatcgaagaagcgtgaccggtgtgaactgatcggctctgg  
acgaaaacttccgtaccctggttgactggcagaaagacaaaaaaacaacgttgcgatgaaagcg  
tacgaaaactctctgcagcgtctgcgtaccgaaatcggtaaaatcttcaacctgaaagcgaaga  
ctgggttaaaaacaataccgatcctgggtctgaaaaacaaaaacaccgacatcctgttcgaag  
aagcggttttcggtatcctgaaagcgttacggtgaagaaaaagacaccttcatcgaagttaa  
gaaatcgacaaaaccgtaaatctaaaatcaaccagatctctatcttcgactcttgaaaggttt  
caccggttacttcaaaaaatcttcgaaaccgtaaaaactctacaaaaacgacggtaacctta  
ccgcatcgcgaccggtatcatcgaccagaacctgaaacgtttcatcgacaacctgtctatcgtt  
gaatctgttcgctcagaaagttgacctggcggaaaccgaaaaatctttctctatctctctgtctca  
gttcttctctatcgactctacaacaaatgcctgctgcaggacggatcgactactacaacaaaa  
tcatcggtgggtgaaacctgaaaaacggtgaaaaactgatcggctcgaacgaactgatcaaccag  
taccgtcagaacaacaaagaccagaaaatccggtcttcaaactgctggacaaacagatcctgtc  
tgaaaaaatcctgttcttgacgaaatcaaaaacgacaccgaaactgatcgaagcgtgtctcagt  
tcgcgaaaaccgcggaagaaaaaaccaaaatcgttaaaaaactgttcgcggacttctgtgaaac  
aactctaaatacgacctggcgcagatctacatctctcaggaagcgttcaacacctctctaaca  
atggacctctgaaaccgaaaccttcgcgaaatacctgttcgaagcgatgaaatctggtaaactgg  
cgaatacgaaaaaaaagacaactcttacaatcccggacttcatcgcgctgtctcagatgaaa  
tctgcgctgctgtctatctctctggaaggtcacttctggaagaaaaatactacaaaatctctaa  
attccaggaaaaaaccaactgggaacagttcctggcgtatcttctgtacgaattcaactctctgt  
tctctgacaaaatcaacaccaaagacggtgaaaccaaacaggttggttactacctgttcgcgaaa  
gacctgcacaacctgatcctgtctgaacagatcgacatcccgaagactctaaagtaccatcaa  
agacttcgcggactctgttctgaccatctaccagatggcgaaatacttcgcggttgaaaaaaac  
gtgcgtggctggcggaatacgaactggactctttctacaccagccggacaccggttacctgcag  
ttctacgacaacgcgtacgaagacatcgttcaggtttacaacaaactgcgtaactacctgaccaa  
aaaaccgtactctgaagaaaaatggaaactgaacttcgaaaactctaccctggcgaacgggtggg  
acaaaaacaagaatctgacaactctgcggttatcctgcagaaaggtggtaatactacctgggt

SC\_Cpf1\_3

AAGCATTGGCCGTAAGTGCATTCGGAAAGGAGATATACatgaccagttcgaagtttcacca  
acctgtaccaggtttctaaaacctgcgtttcgaactgatcccgcagggtaaaacctgaaacac  
atccaggaacagggtttcatcgaagaagacaaaagcgcgtaacgaccactacaaagaactgaaacc  
gatcatcgaccgtatctacaaaacctacgcggaccagtgccctgcagctggttcagctggactggg  
aaaacctgtctgcggcgatcgactcttaccgtaaagaaaaaacgaagaaacctgtaacgcgctg  
atcgaagaacaggcgacctaccgtaacgcgatccacgactactcatcggtcgtaccgacaacct  
gaccgacgcgatcaacaaacgtcacgcggaaatctacaaaggctctgttcaaagcggaaactgttca  
acggtaaagttctgaaacagctgggtaccgttaccaccaccgaacacgaaaacgcgctgctgcgt  
tctttcgacaaattcaccacctacttctctggtttctacgaaaaccgtaaaaacgttttctctgc  
ggaagacatctctaccgcgatcccgcaccgtatcgttcaggacaacttcccgaattcaaagaaa  
actgccacatcttaccctctgatcaccgcggttccgtctctgcgtgaacacttcgaaaacggt  
aaaaagcgatcggtatcttcgtttctacctctatcgaagaagttttctctttcccgttctacaa  
ccagctgctgaccagaccagatcgacctgtacaaccagctgctgggtggtatctctcgtgaag  
cgggtaccgaaaaaatcaaaggctgtaacgaagtctgaacctggcgatccagaaaaacgacgaa  
accgcgcacatcatcgcgctctctgccgcaccgttctatcccgtggtcaaacagatcctgtctga  
ccgtaacacctgtctttcatcctggaagaattcaaatctgacgaagaagttatccagctctttct  
gcaatacaaaaacctgctgcgtaacgaaaacgttctggaaccgcggaagcgtgttcaacgaa  
ctgaactctatcgacctgaccacatcttcatctctcacaanaaacggaaacctctcttctgc  
gctgtgcgaccactgggacacctgcgtaacgcgctgtacgaacgctcgtatctctgaactgaccg  
gtaaaatcaccaaatctgcgaaagaaaaagttcagcgttctctgaaacacgaagacatcaacctg  
caggaatcatctctgcggcgggtaaagaactgtctgaagcgttcaaacagaaaacctctgaaat  
cctgtctcagcgcacgcggcgtggaccagccgtgccgaccacctgaaaaaacaggaagaaa  
aagaaatcctgaaatctcagctggactctctgctgggtctgtaccacctgctggactggttcgcg  
gttgacgaatctaacgaagttgaccggaaatctctgcgcgcttgaccggtatcaaactggaat  
ggaaccgtctctgtctttctacaacaaagcgcgtaactacgcgacaaaaaacctactctgttg  
aaaaattcaaaactgaacttcagatgccgacctggcgtctggttgggacgttaacaaagaaaa  
aacaacggtgcgatcctgttcgtaaaaacggtctgtactacctgggtatcatgccgaaacagaa  
aggctgttacaagcgtgtctttcgaaccgaccgaaaaaacctctgaaggtttcgacaaaatgt  
actacgactacttcccggacgcggcgaanaatgatcccgaatgctctaccagctgaaagcggtt

SD\_Cpf1\_4

GTACTTATGAAGACATTTCCGGGTTTTATCGTGAGgtcgataatctgtgctacaaactggagttc  
tgcccgattaaaacctcgtttatagaaaacctgatagataacggcgacctgtatctgtttcgc  
caataacaaagacttcagcagtaaatcgaccggcaccaagaaccttcatacgttatattacaag  
ctatattcgatgaacgtaatctgaacaatccgacaattatgctgaatgggggagcagaactgttc  
tatcgtaaagaaagtattgagcagaaaaaccgtatcacacacaaagccggttcaattctcgtgaa  
taaggtgtgtaaagacggtaacaagcctggatgataagatacgtaatgaaatctcaatatgaga  
ataaatttattgataccctgtctgatgaagctaaaaaggtgttaccgaatgtcattaaaaaggaa  
gctacccatgacattacaaaagataaacgtttcactagtgacaaattcttctttcactgccccct  
gacaattaattataaggaaggcgataccaagcagttcaataacgaagtgtgagtttctgcgtg  
gaaatcctgacatcaacattatcggcattgaccgaggagagcgtaatctaatctatgtaacggtt  
ataaaccagaaaggcgagattctggattcggtttcaattcaataccgtgaccaacaagagttcaaa  
aatcgagcagacagtcgattatgaagagaaattggcagtcctgcgagaaagagaggattgaagcaa  
aacgttctgggactctatctcaaaaattgcgacactaaaggaaggttatctgagcgaatagtt  
cacgagatctgtctgttaatgattaacacacacgcgatcgttgtcttagagaatcttaatgcagg  
ctttaagcgtattctgtggcggtttatcagaaaaagtggtttatcaaaaattcgaaaaatgttga  
ttaacaaactgaactatctgtcagcaagaaggaatccgactggaataaacctctggctctgctg  
aatggactgcagctttcggatcagtttgaaagcttcgaaaaactgggtattcagctctggtttat  
tttttacgtgccggctgcatataacctcaaagattgatccgaccacgggcttcgccaatgttctga  
atctgtcgaaggtacgcaatgttgatgcgatcaaaagcttttttctaacttcaacgaaattagt  
tatagcaagaagaagcccttttcaaattctcattcgcgatctggattcactgagtaagaaaggctt  
tagtagctttgtgaaatttagtaagagtaaatggaacgtctacacctttggagaacgtatcataa  
agccaaagaataagcaaggttatcgggaggacaaaagaatcaacttgaccttcgagatgaagaag  
ttacttaacgagtataaggtttcttttgatcttgaataaacttgattccgaatctcacgagtgc  
caacctgaaggatactttttgaaagagctattctttatcttcaagactacgctgcagctccgta  
acagcgttactaacggtaaagaagatgtgctcatctctccggtcaaaaatgcgaagggtgaattc  
ttcgtttcgggaacgcataacaagactcttccgcaagattgcgatgcgaacgggtgcataccat  
tgcgttgaaaggtctgatgatactcgaacgtaacaaccttgatcgtgaggagaaagatacgaaaa  
agattatggcgatttcaaacgtggattggttcgagtagctgcagaaacgtagaggcgttctgtaa  
GAAATCATCCTTAGCGAAAGCTAAGGCTGATACTCTTCC

|           |                                                                                                                                                                                                                                                                                                                                                                                                                                                                                                                                                                                                                                                                                                                                                                                                                                                                                                                                                                                                                                                                                                                                                                                                                                                                                                                                                                                                                                                                                                                                                                                                                                                                                                                                                                                                                                                                                                                                               |
|-----------|-----------------------------------------------------------------------------------------------------------------------------------------------------------------------------------------------------------------------------------------------------------------------------------------------------------------------------------------------------------------------------------------------------------------------------------------------------------------------------------------------------------------------------------------------------------------------------------------------------------------------------------------------------------------------------------------------------------------------------------------------------------------------------------------------------------------------------------------------------------------------------------------------------------------------------------------------------------------------------------------------------------------------------------------------------------------------------------------------------------------------------------------------------------------------------------------------------------------------------------------------------------------------------------------------------------------------------------------------------------------------------------------------------------------------------------------------------------------------------------------------------------------------------------------------------------------------------------------------------------------------------------------------------------------------------------------------------------------------------------------------------------------------------------------------------------------------------------------------------------------------------------------------------------------------------------------------|
| CT_Cpf1_4 | GTACTTATGAAGACATTTCCGGGTTTTATCGTGAGgttgaaaaacagggttaccgatatgcacttc<br>gaaaacatctctgcggaaccatcgacgaatacgttgaaaaaggtgacctgttctctgttccagat<br>ctacaacaaagacttcgttaaagcggcgaccggtaaaaaagacatgcacaccatctactggaacg<br>cggcgttctctccgaaaacctgcaggacgttgttgtaaactgaacggtgaagcggactgttc<br>taccgtgacaaatctgacatcaaagaaatcgttcaccgtgaagtgaaatcctggttaaccgtac<br>ctacaacggtcgtaccccggttccggacaaaatccacaaaaactgaccgactaccacaacggtc<br>gtaccaagacctgggtgaagcgaagaatacctggacaaaagttcgttacttcaaagcgcactac<br>gacatcaccaaagacctcgttacctgaacgacaaaatctacttccacgttccgctgacctgaa<br>cttcaaagcgaacggtaaaaaacctgaacaaaatggttatcgaaaaattcctgtctgacgaaa<br>aagcgcacatcatcggtatcgacctgggtgaacgtaacctgctgtactactctatcatcgacct<br>tctggtaaaatcatcgaccagcagtcctcgaacgttatcgacggttccgactaccgtgaaaaact<br>gaaccagcgtgaaatcgaatgaaagacgcgcgtcagtccttgaaacgcgatcggtaaaatcaaag<br>acctgaaagaaggttacctgtctaaagcggttcacgaaatcaccaaaaatggcgatccagtacaac<br>cgatcgttgttatggaagaactgaactacggtttcaaacgtggtcggtttcaaagtgaaaaaca<br>gatctaccagaaattcgaaaacatgctgatcgacaaaatgaactacctggttttcaaagacgcgc<br>cggacgaatctccgggtgggttctgaacgcgtaccagctgaccaaccgctggaatctttcgcg<br>aaactgggtaaacagaccggtatcctgttctacgttccggcggcgtacacctctaaaatcgacc<br>gaccaccggtttcgttaacctgttcaaacctcttctaaaaccaacgcgcaggaacgtaagaat<br>tcctgcagaaattcgaatctatctcttactctgcgaaagacggtggatcttccgcttcgcggtc<br>gactaccgtaaattcggtagctctaaaaccgaccacaaaaacgtttggaccgcgtacaccaacgg<br>tgaacgtatgcgttacatcaaagaaaaaaaaacgtaacgaactgttcgacctctaaagaaatca<br>aagaagcgtgacctcttctggatcaaatacgacggtggtcagaacatcctgccggacatcctg<br>cgttctaacaacaacggtctgatctacaccatgtactcttcttctcatcgcggcgatccagatgcg<br>tgtttacagcgtaaagaagactacatcatctctccgatcaaaaactctaaagtgattcttcc<br>gtaccgacctgaaacgtcgtgaactgccgatcgacgcggacgcgaacggtgctacaacatcgcg<br>ctgcgtgggtgaactgaccatgcgtgcgatcgcgaaaaattcgacctgactctgaaaaaatggc<br>gaaactggaactgaaacacaaagactggttcgaattcatgcagacctggtgactaaGAAATCA<br>TCCTTAGCGAAAGCTAAGGCTGATACTCTCC |
|-----------|-----------------------------------------------------------------------------------------------------------------------------------------------------------------------------------------------------------------------------------------------------------------------------------------------------------------------------------------------------------------------------------------------------------------------------------------------------------------------------------------------------------------------------------------------------------------------------------------------------------------------------------------------------------------------------------------------------------------------------------------------------------------------------------------------------------------------------------------------------------------------------------------------------------------------------------------------------------------------------------------------------------------------------------------------------------------------------------------------------------------------------------------------------------------------------------------------------------------------------------------------------------------------------------------------------------------------------------------------------------------------------------------------------------------------------------------------------------------------------------------------------------------------------------------------------------------------------------------------------------------------------------------------------------------------------------------------------------------------------------------------------------------------------------------------------------------------------------------------------------------------------------------------------------------------------------------------|

|           |                                                                                                                                                                                                                                                                                                                                                                                                                                                                                                                                                                                                                                                                                                                                                                                                                                                                                                                                                                                                                                                                                                                                                                                                                                                                                                                                                                                                                                                                                                                                                                                                                                                                                                                                                                                                                                                                                                        |
|-----------|--------------------------------------------------------------------------------------------------------------------------------------------------------------------------------------------------------------------------------------------------------------------------------------------------------------------------------------------------------------------------------------------------------------------------------------------------------------------------------------------------------------------------------------------------------------------------------------------------------------------------------------------------------------------------------------------------------------------------------------------------------------------------------------------------------------------------------------------------------------------------------------------------------------------------------------------------------------------------------------------------------------------------------------------------------------------------------------------------------------------------------------------------------------------------------------------------------------------------------------------------------------------------------------------------------------------------------------------------------------------------------------------------------------------------------------------------------------------------------------------------------------------------------------------------------------------------------------------------------------------------------------------------------------------------------------------------------------------------------------------------------------------------------------------------------------------------------------------------------------------------------------------------------|
| TX_Cpf1_4 | GTA<br>CTTATGAAGACATTTCCGGGTTTTATCGTGAGgtagaaaaccagggttacgtaattagcttt<br>gacaaaatcaaagagacctatatacagagccagggtggaacagggtaatctctacttattccagat<br>ttataacaaggatttctcgccctacagcaaaggcaaaccctgcatactctgtactggaaag<br>ccctgtttgaagaagcgaacctgaataacgtagtggcgaagttgaacggtgaagcggaaatcttc<br>ttccgtcgtcactccattaaggcctctgataaagtgtccatccggcaaatcaggccattgataa<br>taagaatccacacacggaaaaacgcagtcaacctttgaatatgacctcgttaaagacaaacgct<br>acacgcaagataagttcttttccacgtcccaatcagcctcaactttaagcacaaggggttca<br>aagtttaatgataaagtcaatgggttcccaagggaacccggatgtcaacattataggtataga<br>cagggcgaacgccatctgctttactttaccgtagtgaatcagaaagggtgaaatactggttcagg<br>aatcattaaataccttgatgtcggacaaagggcagttaatgattaccagcagaaactggataaa<br>aaagaacaggaacgtgatgctgcgcgtaaatcgtaggaccaggttgagaacattaaagactgaa<br>agaggggtatctaagccatgtggtacacaaactggcgcacctcatcattaaatataacgcaatag<br>tctgcctagaagacttgaattttgctttaaacgcggccgcttcaaagtggaaaaacaagtttat<br>caaaaatttgaaaaggccttatagataaactgaattatctggtttttaagaaaaggaacttgg<br>tgaggtagggcactacttgacagcttatcaactgacggccccgttcgaatcattcaaaaaactgg<br>gcaaacagctctggcattctgttttacgtgccgcagattatacttcaaaaatcgatccaacaact<br>ggctttgtgaacttccctggacctgagatcagctctgtgaaaaagctaacaacttcttagcga<br>ttttaatgccattcgttttaacagcgttcagaattactttgaattcgaaattgactataaaaaac<br>ttactccgaaacgtaaagtcggaacccaaagtaaatgggtaattgtacgtatggcgatgtcagg<br>tatcagaaccgtcggaaatcaaaaaggtcattgggagaccgaagaagtgaacgtgaccgaaaagct<br>gaaggctctgttcgccagcgattcaaaaactacaactgtgatcgattacgcaaatgatgataacc<br>tgatagatgtgatttttagagcaggataaagccagcttttttaagaactgttgtggctcctgaaa<br>cttacgatgaccttacgacattccaagatcaaatcggagatgatatttattctgtcaccggtcaa<br>gaatgagcagggtgaattctatgatagtaggaaagccggcgaagtgtagccgaaagacgccgacg<br>ccaatggcgcctatcatatcgcgctcaaaggctttggaatttcagcagattaaccagtgggaa<br>aaaggtaaaacctgaatctggctatcaaaaaccaggattggtttagctttatccaagagaaacc<br>gtatcaggaatgaGAAATCATCCTTAGCGAAAGCTAAGGCTGATACTCTTCC |
|-----------|--------------------------------------------------------------------------------------------------------------------------------------------------------------------------------------------------------------------------------------------------------------------------------------------------------------------------------------------------------------------------------------------------------------------------------------------------------------------------------------------------------------------------------------------------------------------------------------------------------------------------------------------------------------------------------------------------------------------------------------------------------------------------------------------------------------------------------------------------------------------------------------------------------------------------------------------------------------------------------------------------------------------------------------------------------------------------------------------------------------------------------------------------------------------------------------------------------------------------------------------------------------------------------------------------------------------------------------------------------------------------------------------------------------------------------------------------------------------------------------------------------------------------------------------------------------------------------------------------------------------------------------------------------------------------------------------------------------------------------------------------------------------------------------------------------------------------------------------------------------------------------------------------------|

CA\_Cpf1\_4

GTA CTTATGAAGACATTTCCGGGTTTTATCGTGAGgtggccggagccggttactatatgagtctg  
agaaaaattccgtgcagcgaagtgtaccgtctgttagacgagaaatcgatttatctatttcaaat  
ttataacaaagattactctgaaaatgcacatggtaataagaacatgcataccatgtactgggagg  
gtctcttttccccgaaaacctggagtcgccgttttcaagttgtcgggtggggcagaacttttc  
tttcgaaaatcctcaatccctaacgatgcaaaaacagtacaccgaaaggctcagtgtggttcc  
acgtaatgatgttaacggtcggcgatttccagattcaatctaccggaactgacacgctatttta  
accgtggcgattgccgaatcagtgacgaagccaaaagtattcttgacaaggttaagactaaaaaa  
gcgaccatgacattgtgaaagatcgccgctttaccgtggataaaaatgatgttccacgtcccgat  
tgcgatgaaactttaaggcgatcagtaaaccgaacttaacaaaaagtcattgatggcatcattg  
atgatcaggatctgaaaatcattgggtattgatcgtggcgagcggaaacttaatttacgtcacgatg  
gttgacagaaaaggaatatcttatatcaggattctcttaacatcctcaatggctacgactatcg  
taaagctctggatgtgcgcaatatgacaacaaggaagcgcgtcgaactggactaaagtggagg  
gcattcgcaaaatgaaggaaggctatctgtcattagcggctcgaatttagcggatatgattatc  
gaaaataacgccatcatcgttatggaggacctgaaccacggattcaaagcgggcccgtcaaagat  
tgaaaaacaagtttatcagaaatttgagagtatgctgattaacaaactgggctatatgggtgtaa  
aagacaagtcaattgaccaatcaggtggcgcgtgcatggataccagctggcgaaccatgttacc  
accttagcatcagttgaaaagcagtggtgggttatctttatataccggcagcgttactagtaa  
aatagatccgaccactggtttcgcgatctctttgccctgagtaacgttaaaaacgtagcagca  
tgcgtgaattcttttccaaaatgaaatctgtcatttatgataaagctgaaggcaattcgcattc  
acctttgattacttgattacaacgtgaagagcgaatgtggtcgtacgctgtggaccgtttacac  
cgttggtgagcgttcacctattcccgtgtgaaccgcaatgtacgtaaagtcaccaccgata  
ttatctatgatgccctccagaaagcaggcattagcgtcgaaggagacttaaggacagaaattgcc  
gaaagcgatggcgatacgtgaagtctatTTTTTtacgcattcaaatacgcgctagatatgcgcgt  
tgagaatcgcgaggaagactacattcaatcacctgtgaaaaatgcctctggggaattttttggt  
caaaaaatgctggtaaaagcctcccacaagatagcgatgcaaacggtgcatataacattgccctg  
aaaggtattcttcaattacgcatgctgtctgagcagtagcaccacaacgcggaatctattagact  
tccgctgataaccaataaagcctggctgacattcatgcagctcggcatgaagacctgaaaaatt  
agGAAATCATCCTTAGCGAAAGCTAAGGCTGATACTCTTCC

|           |                                                                                                                                                                                                                                                                                                                                                                                                                                                                                                                                                                                                                                                                                                                                                                                                                                                                                                                                                                                                                                                                                                                                                                                                                                                                                                                                                                                                                                                                                                                                                                                                                                                                                                                                                                                                                                                                  |
|-----------|------------------------------------------------------------------------------------------------------------------------------------------------------------------------------------------------------------------------------------------------------------------------------------------------------------------------------------------------------------------------------------------------------------------------------------------------------------------------------------------------------------------------------------------------------------------------------------------------------------------------------------------------------------------------------------------------------------------------------------------------------------------------------------------------------------------------------------------------------------------------------------------------------------------------------------------------------------------------------------------------------------------------------------------------------------------------------------------------------------------------------------------------------------------------------------------------------------------------------------------------------------------------------------------------------------------------------------------------------------------------------------------------------------------------------------------------------------------------------------------------------------------------------------------------------------------------------------------------------------------------------------------------------------------------------------------------------------------------------------------------------------------------------------------------------------------------------------------------------------------|
| PC_Cpf1_4 | GTACTTATGAAGACATTTCCGGGTTTTATCGTGAGgttgaggatcaggggtataagctctctttc<br>cgaaaagtttcggaatcttatgtctattcattaatagatcaaggcaagttgtatttatttcagat<br>atacaacaaggacttttctccctgcagcaaaggacacctaactctgcataaccttgattggagaa<br>tgctttttgacgagcgcaatttgccagatgtcatatacaaaactggatgggaaggctgaaatcttt<br>ttccgagagaagagtttgaaaaatgatcatcccacgcatccggctggtaagcctatcaaaaagaa<br>aagtcgacaaaaaaaaaggagaggagagctgtttgagtatgatttagtcaaggataggcactata<br>cgatggataagttccagtttcatgtgcctattactatgaattttaaatgttctgcaggaagcaaa<br>gtcaatgatatggttaatgctcatattcgagaggcaaaggatatgcatgtcattggaattgatcg<br>tgagaaacgcaatctgctgtatatatgctgtatagatagtcgagggacgattttggatcaaattt<br>ctctgaatacgatatacgatatagactatcatgatttattggagagtcgagacaaagaccgtcag<br>caggagcgcgaaactggcaaacatcgaagggatcaaggagctaaaacaaggctaccttagtca<br>ggcggttcatcggatagccgaactgatggtgcttataaggctgtagttgctttggaggatttga<br>atatggggttcaaactggcgccagaaaagtagaaagtctgtttatcagcagtttgagaaacag<br>ctgatagataagctcaactatcttgtggacaagaagaaaaggcctgaagatatggaggattggt<br>gagagcctatcaatttacggccccatttaagagttttaaggaaatgggaaagcaaacggcttct<br>tgttttatatcccggcttgaacacgagcaacatagatccgactactggatttgtaatttattt<br>catgccagtatgaaaatgtagataaagcgaagagcttctttcaaagtttgattcaattagtta<br>caaccgaagaaagactggtttgagtttgcatcgtattataaaaactttactaaaaggctgaag<br>gaagtcgttctatgtggatattatgcacacatggttcccgaataaagaattttagaaatcccag<br>aagaatggtcaatgggattccgaagaattgccttgacggaggcttttaagtctctttttgtgcg<br>atatgagatagattataccgctgatttgaaaacagctattgtggacgaaaagcaaaaagacttct<br>tcgtggatcttctgaagctattcaaattgacagtacagatgcgcaacagctggaaagagaaggat<br>ttggattatctaattctctcctgtagcagggctgatggcgttcttctcgatacaagagaggaaa<br>taaaagtctgcctaaggatgcagatgccaatggagcttataatattgccctaaaaggactttggg<br>ctctacccagattcggcaaacctcagaaggcggtaaactcaaattggcgatttccaataaggaa<br>tggtacagtttgtgcaagagagatcttacgagaaagactgaGAAATCATCCTTAGCGAAAGCTA<br>AGGCTGATACTCTCC |
|-----------|------------------------------------------------------------------------------------------------------------------------------------------------------------------------------------------------------------------------------------------------------------------------------------------------------------------------------------------------------------------------------------------------------------------------------------------------------------------------------------------------------------------------------------------------------------------------------------------------------------------------------------------------------------------------------------------------------------------------------------------------------------------------------------------------------------------------------------------------------------------------------------------------------------------------------------------------------------------------------------------------------------------------------------------------------------------------------------------------------------------------------------------------------------------------------------------------------------------------------------------------------------------------------------------------------------------------------------------------------------------------------------------------------------------------------------------------------------------------------------------------------------------------------------------------------------------------------------------------------------------------------------------------------------------------------------------------------------------------------------------------------------------------------------------------------------------------------------------------------------------|



FB\_Cpf1\_4

GTACTTATGAAGACATTTCCGGGTTTTATCGTGAGgtagaacaccaaggctataaaattaacttc  
aaaaacatcgacagcgaatacatcgacggttagttaacgagggcaaactgtttctgttccagat  
ctattcaaaggatttttagcccgttctctaaaggcaaaccaaatgcatatcggttactggaag  
cactgtttgaagagcaaaacctgcagaatgtgatttataaactgaacggccaagctgagat  
ttccgtaaagcctcgattaaaccgaaaaatcatccttcataagaagaaataaagatcgctaa  
aaaacacttcatagataaaaaaaccaaacctccgaaatagtgcctgttcaacaattaagaact  
tgaatatgtactaccaggcaagatatcggaaaaggagttgactcaagacgatcttcgctatatac  
gataacttttcgatttttaacgaaaaaacaagacgatcgacatcatcaaagataaacgcttcac  
tntagataagttccagtttcatgtgccgattactatgaacttcaaagctaccggggtagctata  
tcaaccaaacgggtgttgaataacctgcagaataaccgggaagctaaaatcattgggctggaccgc  
ggagaacgtcaccttgtgtacttgaccttaatcgatcagcaaggcaacatcttaaacagaatc  
gctgaataccattacggattcaaagattagcaccctgatcataagctgctcgataacaaggaga  
atgagcgcgacctggcccgtaaaaactggggcaggtggaaaacattaaggagttaaaggagggt  
tatatttccaggtagtgcataagatcgccactctcatgctcgaggaaaatgcgatcgttgtcat  
ggaagacttaaacttcgattttaaactggggcattttaaagtagagaaacaaatctaccagaagt  
tagaaaaatgctgattgacaaattaaattacttggctctaaaagacaaacagccgcaagaattg  
ggtgattatacaacgccctccaacttaccaataaattcgaaagtttccagaaaatgggtaaca  
gtcaggtttctttttatgttctgctggaacacatccaaaatcgacctacaaccggcttcg  
tcaattacttctataactaaatgaaaacgtcgacaaagcaaaagcattctttgaaaagttcgaa  
gcaatacgttttaacgctgagaaaaaatatttcgagttcgaagtcaagaatactcagactttaa  
ccccaaagctgagggcacacagcaagcgtggacaatctgcacctacggcgagcgcacgaaacga  
agcgtcaaaaagatcagaataacaaatgtttcaacacctatcaacctgaccgagaagattgaa  
gacttcttaggtaaaaatcagattgtttatggcgacggttaactgtataaaatctcaaatagcctc  
aaaggatgataaagcatttttcgaaacattattatattggttcaaatgacactgcagatgcgca  
atagtgagacgcgtacagatattgattatctatcagcccgtcatgaacgacaacggactttt  
tacaactccagagactatgaaaaacttgagaatccaactctcccaaagatgctgatgcgaacgg  
tgcttatcacatcgcgaaaaaaggctgtgatgctgctgaacaaaatcgaccaagccgatctgacta  
agaaagttgacctaaagcatttcaaatcgggactgggttacagttgttcaaaagaacaaatgaGAA  
ATCATCCTTAGCGAAAGCTAAGGCTGATACTCTCC

|           |                                                                                                                                                                                                                                                                                                                                                                                                                                                                                                                                                                                                                                                                                                                                                                                                                                                                                                                                                                                                                                                                                                                                                                                                                                                                                                                                                                                                                                                                                                                                                                                                                                                                                                                                                                                                                                                                                                                                                                                                                                                                                                                                                                                                                                                                                                                                                                                                                                                                                                                                                                                                                                                                                                                                                                                                                                                                                                                                                                                                                                                                                                              |
|-----------|--------------------------------------------------------------------------------------------------------------------------------------------------------------------------------------------------------------------------------------------------------------------------------------------------------------------------------------------------------------------------------------------------------------------------------------------------------------------------------------------------------------------------------------------------------------------------------------------------------------------------------------------------------------------------------------------------------------------------------------------------------------------------------------------------------------------------------------------------------------------------------------------------------------------------------------------------------------------------------------------------------------------------------------------------------------------------------------------------------------------------------------------------------------------------------------------------------------------------------------------------------------------------------------------------------------------------------------------------------------------------------------------------------------------------------------------------------------------------------------------------------------------------------------------------------------------------------------------------------------------------------------------------------------------------------------------------------------------------------------------------------------------------------------------------------------------------------------------------------------------------------------------------------------------------------------------------------------------------------------------------------------------------------------------------------------------------------------------------------------------------------------------------------------------------------------------------------------------------------------------------------------------------------------------------------------------------------------------------------------------------------------------------------------------------------------------------------------------------------------------------------------------------------------------------------------------------------------------------------------------------------------------------------------------------------------------------------------------------------------------------------------------------------------------------------------------------------------------------------------------------------------------------------------------------------------------------------------------------------------------------------------------------------------------------------------------------------------------------------------|
| CR_Cpf1_4 | GTA<br>CTTATGAAGACATTTCCGGGTTTTATCGTGAGg<br>ttg<br>cgggacggttac<br>cgattc<br>gacttc<br>caggat<br>ctctg<br>accagt<br>acatcc<br>cacgaa<br>aaaaa<br>acgaa<br>aaagg<br>tgaact<br>gcac<br>ctgttc<br>gaaat<br>ccaca<br>caaag<br>acttg<br>gaact<br>ggaca<br>aaagc<br>gcgtg<br>acgg<br>taaat<br>ctaaa<br>accac<br>ccagaa<br>aaacc<br>tgcac<br>accct<br>gtact<br>tcgaa<br>tctct<br>gttct<br>etaac<br>gaca<br>acggt<br>gttc<br>caga<br>acttc<br>ccgat<br>caaa<br>ctgaa<br>cggtc<br>aggc<br>gaaat<br>cttct<br>accgt<br>ccgaa<br>aaacc<br>gaaaa<br>agaca<br>aaact<br>ggaat<br>ctaaaa<br>agaca<br>aaaaa<br>aggta<br>acaaa<br>gttat<br>cgacc<br>acaa<br>cgttac<br>tctg<br>aaaac<br>aaaat<br>cttct<br>tccac<br>gttcc<br>gctg<br>accct<br>gaacc<br>gtacca<br>aaaac<br>gactc<br>ttacc<br>gttt<br>caac<br>gcgc<br>gatca<br>acaac<br>ttc<br>ctggc<br>gaaca<br>caaa<br>agaca<br>tcaac<br>atcat<br>cgggt<br>gttg<br>accgt<br>ggtg<br>aaaa<br>aacct<br>ggttt<br>acta<br>ctct<br>gttat<br>cacc<br>cagg<br>cgtct<br>gacat<br>cctg<br>gaat<br>ctggt<br>tctct<br>gaac<br>gaact<br>gaac<br>gggt<br>taaaa<br>agcgg<br>aaaac<br>cgtg<br>aacag<br>gcgc<br>gctc<br>gtgac<br>tggc<br>aggac<br>gttc<br>agggt<br>atcaa<br>agac<br>ctgaa<br>aaaa<br>aggt<br>tacat<br>ctct<br>caggt<br>gttc<br>gtaa<br>actg<br>ggcg<br>gacct<br>ggcg<br>atcaa<br>acac<br>gcgat<br>catcat<br>cctg<br>gaag<br>acct<br>gaac<br>atgc<br>gttt<br>caa<br>acagg<br>ttcgt<br>gtggt<br>atcg<br>aaaa<br>atct<br>atct<br>accag<br>cagct<br>tgaaa<br>aaag<br>cgcgt<br>gatc<br>gaca<br>aaact<br>gtct<br>ttcct<br>gtg<br>gacaa<br>agg<br>tgaaa<br>aaac<br>cccg<br>gaac<br>aggc<br>gggt<br>cacct<br>gctg<br>aaag<br>cgtac<br>cagct<br>gtct<br>gc<br>gccgt<br>tcgaa<br>acct<br>tccag<br>aaaat<br>gggta<br>aacag<br>accg<br>gtat<br>catct<br>ttct<br>tacac<br>ccagg<br>cgtct<br>t<br>acacct<br>ttaa<br>atct<br>gacc<br>cgggt<br>accg<br>gttgg<br>cgtcc<br>gcacct<br>gtacct<br>gaaat<br>actt<br>ctct<br>gcg<br>aaaa<br>agcga<br>aaag<br>acgaca<br>tccg<br>cgaat<br>tcacca<br>aaaat<br>cgaat<br>tcgt<br>taac<br>gacct<br>ttcga<br>act<br>gacct<br>acgac<br>atcaa<br>agact<br>tccag<br>cagg<br>cgaaga<br>atacc<br>cgaaca<br>aaaac<br>cgttt<br>ggaa<br>agttt<br>gctct<br>aacgt<br>tgaac<br>gttt<br>cgtt<br>gggaca<br>aaaa<br>acctg<br>aacca<br>gaaac<br>aaag<br>gtggt<br>tacacc<br>cac<br>tacacca<br>acatc<br>accg<br>aaaac<br>atccag<br>gaact<br>gttc<br>acca<br>aata<br>cggta<br>tcgac<br>atcacc<br>aaaga<br>cctg<br>ctgacc<br>cagat<br>ctct<br>accat<br>cgac<br>gaaaa<br>acaga<br>acacct<br>tttct<br>tccgt<br>gactt<br>catct<br>tctact<br>tcaac<br>ctgat<br>ctgcc<br>agat<br>ccgta<br>acacc<br>gacg<br>actct<br>gaaat<br>tcgca<br>aaaa<br>aaaac<br>gggt<br>aaag<br>acgact<br>tcat<br>ctct<br>gtct<br>cctc<br>cggtt<br>gaacc<br>gttct<br>tcgact<br>ctcgt<br>aaag<br>acaac<br>cggt<br>aacg<br>aaac<br>gggt<br>gacg<br>acaac<br>atct<br>ctcag<br>tact<br>ctgaa<br>aaaa<br>aacg<br>aaaac<br>tcgca<br>aaaa<br>aatg<br>aaat<br>gggg<br>tgacct<br>gtac<br>gttt<br>cta<br>acat<br>cgact<br>gggaca<br>actt<br>cgttt<br>gaGAA<br>ATCAT<br>CCTTAG<br>CGAA<br>AGCTA<br>AGGCT<br>GATA<br>CTCTCC |
|-----------|--------------------------------------------------------------------------------------------------------------------------------------------------------------------------------------------------------------------------------------------------------------------------------------------------------------------------------------------------------------------------------------------------------------------------------------------------------------------------------------------------------------------------------------------------------------------------------------------------------------------------------------------------------------------------------------------------------------------------------------------------------------------------------------------------------------------------------------------------------------------------------------------------------------------------------------------------------------------------------------------------------------------------------------------------------------------------------------------------------------------------------------------------------------------------------------------------------------------------------------------------------------------------------------------------------------------------------------------------------------------------------------------------------------------------------------------------------------------------------------------------------------------------------------------------------------------------------------------------------------------------------------------------------------------------------------------------------------------------------------------------------------------------------------------------------------------------------------------------------------------------------------------------------------------------------------------------------------------------------------------------------------------------------------------------------------------------------------------------------------------------------------------------------------------------------------------------------------------------------------------------------------------------------------------------------------------------------------------------------------------------------------------------------------------------------------------------------------------------------------------------------------------------------------------------------------------------------------------------------------------------------------------------------------------------------------------------------------------------------------------------------------------------------------------------------------------------------------------------------------------------------------------------------------------------------------------------------------------------------------------------------------------------------------------------------------------------------------------------------------|

SC\_Cpf1\_4

GTACTTATGAAGACATTTCCGGTTTTATCGTGAGctgaaccgctgctgtaccacatctctttc  
cagcgtatcgcggaaaaagaaatcatggacgcggttgaaccggtaaactgtacctgttccagat  
ctacaacaaagacttcgcgaaaggtcaccacggtaaaccgaacctgcacacctgtactggaccg  
gtctgttctctccgaaaacctggcgaaaacctctatcaaacgaacggtcaggcggaaactgttc  
taccgtccgaaatctcgtatgaaacgtatggcgcaccgtctgggtgaaaaaatgctgaacaaaa  
actgaaagaccagaaaaccccgatcccgacacctgtaccaggaactgtacgactacgttaacc  
accgtctgtctcagacctgtctgacgaagcgcgtgctgctgccgaacgttatcaccaaagaa  
gtttctcacgaaatcatcaagaccgtcgtttcacctctgacaaattcttcttccacgttccgat  
cacctgaactaccaggcggcgaactctccgtctaaattcaaccagcgtgttaacgcgtacctga  
aagaacaccggaaaccccgatcatcggtatcgaccgtggtgaacgtaacctgatctacatcacc  
gttatcgactctaccggtaaaaatcctggaacagcgttctctgaacaccatccagcagttcgacta  
ccagaaaaacttgacaaccgtgaaaaagaacgtgttgccggcgcgtcaggcgtggtctgttgttg  
gtaccatcaaagacctgaaacagggttacctgtctcaggttatccacgaaatcgttgacctgatg  
atccactaccaggcggttgttgttctggaaaacctgaacttcggtttcaaacttaaacgtaccgg  
tatcgcggaaaaagcggtttaccagcagttcgaaaaatgctgatcgacaaactgaactgcctgg  
ttctgaaagactaccggcggaaaaagttggtggttctgaaccgctaccagctgaccgaccag  
ttcacctcttctcgcaaaatgggtaccagctcgtgttctctacgttccggcgcctacac  
ctctaaaatcgaccgctgaccggttctggtgaccttcggttggaaccatcaaaaaccacg  
aatctcgtaaacacttctggaaggttctgacttctgcactacgacgttaaacccggtgacttc  
atcctgcacttcaaaatgaaccgtaacctgtctttccagcgtggtctgccgggttcatgccggc  
gtgggacatcgtttctgaaaaaacgaaaccagttcgacgcgaaaggtaccccggtcatcgcgg  
gtaaacgtatcgttccggttatcgaaaaccaccgttccaccggtcgttaccgtgacctgtaccg  
gcaacgaactgatcgcgctgctggaagaaaaaggtatcgtttccgtgacggttcaaacatcct  
gccgaaactgctgaaaacgacgactctcacgcgatcgacaccatggttgcgctgatccgttctg  
ttctgcagatgcgtaactctaacgcggcgaccgggtgaagactacatcaactctccggttcgtgac  
ctgaacgggtgttctcactctcgtttccagaaccggatggccgatggacgcggacgcgaa  
cgggtcgtaccacatcgcgctgaaaggtcagctgctgctgaaccacctgaaagaatctaaagacc  
tgaaactgcagaacggatctcttaaccaggactggctggcgtacatccaggaactgcgtaactat  
aaGAAATCATCCTTAGCGAAAGCTAAGGCTGATACTCTTCC

|           |                                                                                                                                                                                                                                                                                                                                                                                                                                                                                                                                                                                                                                                                                                                                                                                                                                                                                                                                                                                                                                                                                                                                                                                                                                                                                                                                                                                                                                                                                                                                          |
|-----------|------------------------------------------------------------------------------------------------------------------------------------------------------------------------------------------------------------------------------------------------------------------------------------------------------------------------------------------------------------------------------------------------------------------------------------------------------------------------------------------------------------------------------------------------------------------------------------------------------------------------------------------------------------------------------------------------------------------------------------------------------------------------------------------------------------------------------------------------------------------------------------------------------------------------------------------------------------------------------------------------------------------------------------------------------------------------------------------------------------------------------------------------------------------------------------------------------------------------------------------------------------------------------------------------------------------------------------------------------------------------------------------------------------------------------------------------------------------------------------------------------------------------------------------|
| SD_Cpf1_5 | <p>CGTATGATAAATACTTCCTTCATATGCCTATTACGATCaattataaggaaggcgataccaagcag<br/> ttcaataacgaagtgctgagttttctgctggaatcctgacatcaacattatcgccattgaccg<br/> cggagagcgtaatTTaatctatgtaacggtataaaccagaaaggcgagattctggattcggttt<br/> cattcaataaccgtgaccaacaagagttcaaaaatcgagcagacagtcgattatgaagagaaattg<br/> gcagtccgcgagaaagagaggattgaagcaaacgttcctgggactctatctcaaaaattgcgac<br/> actaaaggaaggttatctgagcgcaatagttcacgagatctgtctgtaatgattaacacaacg<br/> cgatcgttgtcttagagaatcttaatgcagccttaagcgtatctgtggcggttatcagaaaa<br/> agtgtttatcaaaaatcgaaaaatggtgattaacaaactgaactatTTgtcagcaagaagga<br/> atccgactggaataaacctctggctgctgaatggactgcagctttcggatcagttgaaagct<br/> tcgaaaaactgggtattcagctcgtgtttatTTTTacgtgccggctgcatatacctcaaagatt<br/> gatccgaccacgggcttcgccaatgttctgaatctgtcgaaggtacgcaatggtgatgcgatcaa<br/> aagctTTTTtctaacttcaacgaaatagttatagcaagaaagaagccTTTTcaaatctcat<br/> tcgatctggattcactgagtaagaaaggcttagtagctttgtgaaatttagtaagagtaaattg<br/> aacgtctacaccttggaagacgtatcataaagccaaagaataagcaaggttatcgggaggacaa<br/> aagaatcaacttgaccttcgagatgaagaagttacttaacgagtataaggtttctttgatcttg<br/> aaaataacttgattccgaatctcacgagtgccaacctgaaggatactTTTTgaaagagctattc<br/> tttatcttcaagactacgctgcagctccgtaacagcgttactaacggtaaagaagatgtgctcat<br/> ctctccggtcaaaaatgcgaagggtgaattcttctgtttcgggaacgcataacaagactcttccgc<br/> aagattgcgatgcgaacggtgcataccatattgcgttgaaaggtctgatgatactcgaacgtaac<br/> aaccttgtagctgaggagaaagatacgaaaaagattatggcgatttcaaacgtggattggttcga<br/> gtacgtcgaaaacgtagaggcgttctgtaaGAAATCATCCTTAGCGAAAGCTAAGGCTGATACT<br/> CTTCC</p> |
| CT_Cpf1_5 | <p>CGTATGATAAATACTTCCTTCATATGCCTATTACGATCaacttcaaagcgaacggtaaaaaaac<br/> ctgaacaaaatggttatcgaaaaatcctgtctgacgaaaaagcgcacatcatcggtatcgaccg<br/> tggtgaacgtaacctgctgtactactctatcatcgaccgttctggtaaaatcatcgaccagcagt<br/> ctctgaacgttatcgacggtttcgactaccgtgaaaaactgaaccagcgtgaaatcgaaatgaaa<br/> gacgcgcgtcagctcttgaacgcgatcggtaaaatcaaagacctgaaagaaggttacctgtctaa<br/> agcggttcacgaaatcaccaaaatggcgatccagtacaacgcgatcgttgttatggaagaactga<br/> actacggtttcaaacgtggtcgtttcaaagttgaaaaacagatctaccagaaatcgaaaacatg<br/> ctgatcgacaaaatgaactacctgggtttcaaagacgcgcggacgaatctccgggtgggtgtct<br/> gaacgcgtaccagctgaccaaccgctggaatcttctcgcaaacgggtaaacagaccggtatcc<br/> tgttctacgttccggcggtacacctctaaaatcgaccgaccaccggttctgtaacctgttc<br/> aacacctcttctaaaaccaacgcgcaggaacgtaaaagaattcctgcagaaatcgaatctatctc<br/> ttactctgcgaaagacgggtggtatcttccggttcgcggttcgactaccgtaattcggtacctcta<br/> aaaccgaccacaaaacgtttggaccgcgtacaccaacgggtgaacgtatgcgttacatcaaagaa<br/> aaaaaacgtaacgaactgttcgaccgctctaaagaaatcaaagaagcgtgacctctctggtat<br/> caaatacgacgggtggtcagaacatcctgccggacatcctgcgttctaacaacaacggctgatct<br/> acaccatgtactcttcttcatcgcgcgatccagatgcgtgttacgacggtaaaagactac<br/> atcatctctccgatcaaaaactctaaaggtgaattcttccgtaccgaccgaaacgtcgtgaact<br/> gccgatcgacgcggacgcgaacgggtgcgtacaacatcgcgctgcgtgggtgaactgaccatgcgtg<br/> cgatcgcggaaaaatcgaccggactctgaaaaaatggcgaactggaactgaaacacaaagac<br/> tggttcgaattcatgcagaccggtgactaaGAAATCATCCTTAGCGAAAGCTAAGGCTGATA<br/> CTTCC</p>                                                                      |

|           |                                                                                                                                                                                                                                                                                                                                                                                                                                                                                                                                                                                                                                                                                                                                                                                                                                                                                                                                                                                                                                                                                                                                                                                                                                                                                                                                                                                                                                                                                                                               |
|-----------|-------------------------------------------------------------------------------------------------------------------------------------------------------------------------------------------------------------------------------------------------------------------------------------------------------------------------------------------------------------------------------------------------------------------------------------------------------------------------------------------------------------------------------------------------------------------------------------------------------------------------------------------------------------------------------------------------------------------------------------------------------------------------------------------------------------------------------------------------------------------------------------------------------------------------------------------------------------------------------------------------------------------------------------------------------------------------------------------------------------------------------------------------------------------------------------------------------------------------------------------------------------------------------------------------------------------------------------------------------------------------------------------------------------------------------------------------------------------------------------------------------------------------------|
| TX_Cpf1_5 | <p>CGTATGATAAATACTTCCTTCATATGCCTATTACGATCaactttaagcacaaggggtttcaaag<br/> ttaaataagataaagtcattgggttcctcaagggaaccccgatgtcaacattataggtatagacag<br/> ggcggaacgccatctgctttactttaccgtagtgaatcagaaaggtgaaatactgggttcaggaat<br/> cattaataaccttgatgtcggacaaagggcacgttaatgattaccagcagaaactggataaaaaa<br/> gaacaggaacgtgatgctgcgcgtaaatcgtggaccacggttgagaacattaagagctgaaaga<br/> ggggtatctaagccatgtggtacacaaactggcgcacctcatcattaataataacgcaatagtct<br/> gcctagaagacttgaattttggctttaaacgcggccttcaaagtggaaaaacaagtttatcaa<br/> aatttgaagaggcgttatagataaactgaattatctggtttttaagaaaaggaaacttgggtga<br/> ggtagggcactacttgacagcttatcaactgacggccccgttcgaatcattcaaaaaactgggca<br/> aacagctggcattctgtttacgtgccggcagattatacttcaaaaatcgatccaacaactggc<br/> tttgtgaacttcttgacctgagatatacgtctgtagaaaaagctaaacaacttcttagcgattt<br/> taatgccattcgttttaacagcgttcagaattactttgaattcgaaattgactataaaaaactta<br/> ctccgaaacgtaaagtcggaacccaaagtaaatgggtaatttgtagctatggcgatgtcaggtat<br/> cagaaccgtcggaatcaaaaaggctattgggagaccgaagaagtgaacgtgaccgaaaagctgaa<br/> ggctctgttcgccagcgattcaaaaactacaactgtgatcgattacgcaaatgatgataacctga<br/> tagatgtgatttttagagcaggataaaagccagcttttttaagaactggttggtcctgaaactt<br/> acgatgaccttacgacattccaagatcaaatcggaagatgattttattctgtcaccggctcaagaa<br/> tgagcaggtgaaattctatgatagtaggaaagccggcgaagtgtggccgaaagacgccgaccca<br/> atggcgcctatcatatcgcgctcaaaaggctttggaatttgacagcagattaaccagtgggaaaaa<br/> ggtaaaacctgaaatcgcttatcaaaaaccaggattggtttagctttatccaagagaaaccgta<br/> tcaggaatgaGAAATCATCCTTAGCGAAAGCTAAGGCTGATACTCTTCC</p> |
| CA_Cpf1_5 | <p>CGTATGATAAATACTTCCTTCATATGCCTATTACGATCaactttaaggcgatcagtaaacggaac<br/> ttaaacaataaagtcattgatggcatcattgatgatcaggatctgaaaatcattggattgatcg<br/> tggcgagcggaaacttaatttacgtcacgatggttgacagaaaaggaatatcttatatcaggatt<br/> ctcttaacatcctcaatggctacgactatcgtaaagctctggatgtgcgcgaatatgacaacaag<br/> gaagcgcgtcgttaactggactaaagtgagggcattcgaataatgaaggaaggctatctgtcatt<br/> agcggctcgaattagcggatagattatcgaataatagccatcatcgttatggaggacctga<br/> accacgattcaaagcggccgctcaaagattgaaaaacaagttatcagaatttgagagtatg<br/> ctgattaacaactgggctatatggtgttaaagacaagtcaattgaccaatcaggtggcgcgct<br/> gcatggataccagctggcgaacctgttaccaccttagcatcagttggaagcagtggtggggtta<br/> tcttttatataccggcagcgttcaactagtaaaatagatccgaccactggtttcgccgatctcttt<br/> gcctgagtaacgttaaaaacgtagcagcagatgcgtgaattcttttcaaaaatgaaatctgtcat<br/> ttatgataaagctgaaggcaaatcgcattcacctttgattacttggattacaactgaagagcg<br/> aatgtggtcgtacgctgtggaccgtttacaccgttggtgagcgttcacctattcccgtgtgac<br/> cgcgaatatgtacgtaaaagtcaccacgatattatctatgatgccctccagaaagcaggcattag<br/> cgtcgaaggagacttaaggacagaattgccgaaagcagatggcgatacgtgaagtctatTTTTT<br/> acgattcaaatacgcgctagatatacgcgcttgagaatcgcgaggaagactacattcaatcacct<br/> gtgaaaaatgcctctggggaattTTTTTgtcaaaaatgctggtaaaagcctcccacaagatag<br/> cgatgcaaacggtgcataaacattgccctgaaaggattcttcaattacgatgetgtctgagc<br/> agtacgaccccaacgcggaatctattagacttccgctgataaccaataaagcctggctgacattc<br/> atgcagcttgcatgaagacctggaaaaattagGAAATCATCCTTAGCGAAAGCTAAGGCTGATA<br/> CTCTTCC</p>                                                          |

|           |                                                                                                                                                                                                                                                                                                                                                                                                                                                                                                                                                                                                                                                                                                                                                                                                                                                                                                                                                                                                                                                                                                                                                                                                                                                                                                                                                                                                                                                                                                                                                                                                                                                                                                                                                                                                                                                                                                                                                                                                                                                                                                                                                                                                                                                                                                                                                                                                                                                                                                                                                                                                                                                                                                                                                                                    |
|-----------|------------------------------------------------------------------------------------------------------------------------------------------------------------------------------------------------------------------------------------------------------------------------------------------------------------------------------------------------------------------------------------------------------------------------------------------------------------------------------------------------------------------------------------------------------------------------------------------------------------------------------------------------------------------------------------------------------------------------------------------------------------------------------------------------------------------------------------------------------------------------------------------------------------------------------------------------------------------------------------------------------------------------------------------------------------------------------------------------------------------------------------------------------------------------------------------------------------------------------------------------------------------------------------------------------------------------------------------------------------------------------------------------------------------------------------------------------------------------------------------------------------------------------------------------------------------------------------------------------------------------------------------------------------------------------------------------------------------------------------------------------------------------------------------------------------------------------------------------------------------------------------------------------------------------------------------------------------------------------------------------------------------------------------------------------------------------------------------------------------------------------------------------------------------------------------------------------------------------------------------------------------------------------------------------------------------------------------------------------------------------------------------------------------------------------------------------------------------------------------------------------------------------------------------------------------------------------------------------------------------------------------------------------------------------------------------------------------------------------------------------------------------------------------|
| PC_Cpf1_5 | <p>CGTATGATAAACTCCTTCATATGCCTATTACGATCaat t t t a a a t g t t c t g c a g g a a g c a a a<br/> g t c a a t g a t a t g g t t a a t g c t c a t a t t c g a g a g g c a a a g g a t a t g c a t g t c a t t g g a a t t g a t c g<br/> t g g a g a a c g a a t c t g c t g t a t a t a t g c g t g a t a g a t a g t c g a g g g a c g a t t t t g g a t c a a a t t t<br/> c t c t g a a t a c g a t t a a c g a t a t a g a c t a t c a t g a t t t a t t g g a g a g t c g a g a c a a a g a c c g t c a g<br/> c a g g a g c g c c g a a a c t g g c a a a c t a t c g a a g g g a t c a a g g a g c t a a a a c a a g g c t a c c t t a g t c a<br/> g g c g g t t c a t c g g a t a g c c g a a c t g a t g g t g g c t t a t a a g g c t g t a g t t g c t t t g g a g g a t t g a<br/> a t a t g g g g t t c a a a c g t g g g c g g c a g a a a g t a g a a g t t c t g t t a t c a g c a g t t t g a g a a c a g<br/> c t g a t a g a t a a g c t c a a c t a t c t t g t g g a c a a g a a g a a a a g g c c t g a a g a t a t t g g a g g a t t g t t<br/> g a g a g c c t a t c a a t t t a c g c c c c a t t t a a g a g t t t t a a g g a a t g g g a a a g c a a a a c g g c t t c t<br/> t g t t t a t a t c c c g g c t t g g a a c a c g a g c a a c a t a g a t c c g a c t a c t g g a t t t g t t a a t t t a t t t<br/> c a t g c c c a g t a t g a a a t g t a g a t a a a g c g a a g a g c t t c t t t c a a a a g t t t g a t t c a a t t a g t t a<br/> c a a c c g a a g a a a g a c t g g t t t g a g t t t g c a t t c g a t t a t a a a a a c t t t a c t a a a a a g g c t g a a g<br/> g a a g t c g t t c a t g t g g a t a t t a t g c a c a c a t g g t t c c c a a t a a a g a a t t t t a g a a a t t c c c a g<br/> a a g a a t g g t c a a t g g g a t t c c g a a g a a t t c g c c t t g a c g g a g g c t t t t a a g t c t c t t t t g t g c g<br/> a t a t g a g a t a g a t t a t a c c g c t g a t t t g a a a c a g c t a t t g t g g a c g a a a a g c a a a a a g a c t t c t<br/> t c g t g g a t c t t c t g a a g c t a t t c a a a t t g a c a g t a c a g a t g c g c a a c a g c t g g a a g a g a a g g a t<br/> t t g g a t t a t c t a a t c t c t c c t g t a g c a g g g g c t g a t g g c c g t t c t t c g a t a c a a g a g a g g g a a a<br/> t a a a a g t c t g c c t a a g g a t g c a g a t g c c a a t g g a g c t t a t a a t t g c c c t a a a a g g a c t t t g g g<br/> c t c t a c g c c a g a t t c g g c a a a c t t c a g a a g c g g t a a a c t c a a a t t g g c g a t t t c c a a t a a g g a a<br/> t g g c t a c a g t t t g t g c a a g a g a t a t t a c g a g a a a g a c t g a G A A A T C A T C C T T A G C G A A A G C T A<br/> A G G C T G A T A C T C T T C C</p>                      |
| FB_Cpf1_5 | <p>CGTATGATAAACTCCTTCATATGCCTATTACGATCaact t c a a a g c t a c c g g g g t a g c t a t<br/> a t c a a c c a a a c g g t g t t g g a a t a c c t g c a g a a t a a c c c g g a a g t c a a a a t c a t t g g g c t g g a c c g<br/> c g g a g a a c g t c a c c t t g t g t a c t t g a c c t t a a t c g a t c a g c a a g g c a a c a t c t t a a a a c a a g a a t<br/> c g c t g a a t a c c a t t a c g g a t t c a a a g a t t a g c a c c c c g t a t c a t a a g c t g c t c g a t a a c a a g g a g<br/> a a t g a g c g c g a c c t g g c c c g t a a a a a c t g g g c a c g g t g g a a a c a t t a a g g a g t t a a g g a g g g<br/> t t a t a t t t c c c a g g t a g t g c a t a a g a t c g c c a c t c t c a t g c t c g a g g a a a a t g c g a t c g t t g t c a<br/> t g g a a g a c t t a a a c t t c g g a t t t a a a c t g g g c g a t t t a a a g t a g a g a a c a a a t c t a c c a g a a g<br/> t t a g a a a a a t g c t g a t t g a c a a t t a a a t t a c t t g g t c c t a a a a g a c a a a c a g c c g c a a g a a t t<br/> g g g t g g a t t a t a c a a c g c c c t c c a a c t t a c c a t a a a a t t c g a a a g t t t t c a g a a a t g g g t a a a c<br/> a g t c a g g c t t t c t t t t t a t g t t c t g c g t g g a a c a c a t c c a a a a t c g a c c t a c a a c c g g c t t c<br/> g t c a a t t a c t t c t a t a c t a a a t a t g a a a c g t c g a c a a a g c a a a a g c a t t c t t t g a a a g t t c g a<br/> a g c a a t a c g t t t t a a c g t g a g a a a a a t a t t t c g a g t t c g a a g t c a a g a a a t c a g a c t t t a<br/> a c c c c a a a g c t g a g g g c a c a c a g c a a g c t g g a c a a t c t g c a c t a c g g c g a g c g e a t c g a a a c g<br/> a a g c t c a a a a g a t c a g a a t a a c a a a t t g t t t c a a c a c t a t c a a c c t g a c c g a g a a g a t t g a<br/> a g a c t t c t t a g g t a a a a t c a g a t t g t t t a t g g c g a c g g t a a c t g t a t a a a a t c t c a a a t a g c c t<br/> c a a a g g a t g a t a a a g c a t t t t t c g a a a c a t t a t t a t a t t g g t t c a a a a t g a c a c t g c a g a t g c g c<br/> a a t a g t g a g a c g c g t a c a g a t a t t g a t t a t c t a t c a g c c c g g t c a t g a a c g a c a a c g g t a c t t t<br/> t t a c a a c t c c a g a g a c t a t g a a a a c t t g a g a a t c c a a c t c t c c c c a a a g a t g c t g a t g c g a a c g<br/> g t g c t t a t c a c a t c g c g a a a a a g g t c t g a t g c t g c t g a a c a a a a t c g a c c a a g c c g a t c t g a c t<br/> a a g a a g t t g a c c t a a g c a t t t c a a a t c g g g a c t g g t t a c a g t t t g t t c a a a a g a c a a a t g a G A<br/> A A T C A T C C T T A G C G A A A G C T A A G G C T G A T A C T C T T C C</p> |

|           |                                                                                                                                                                                                                                                                                                                                                                                                                                                                                                                                                                                                                                                                                                                                                                                                                                                                                                                                                                                                                                                                                                                                                                                                                                                                                                                                                                                                                                                                                                                                            |
|-----------|--------------------------------------------------------------------------------------------------------------------------------------------------------------------------------------------------------------------------------------------------------------------------------------------------------------------------------------------------------------------------------------------------------------------------------------------------------------------------------------------------------------------------------------------------------------------------------------------------------------------------------------------------------------------------------------------------------------------------------------------------------------------------------------------------------------------------------------------------------------------------------------------------------------------------------------------------------------------------------------------------------------------------------------------------------------------------------------------------------------------------------------------------------------------------------------------------------------------------------------------------------------------------------------------------------------------------------------------------------------------------------------------------------------------------------------------------------------------------------------------------------------------------------------------|
| CR_Cpf1_5 | <p>CGTATGATAAATACTTCCTTCATATGCCTATTACGATCaaccgtaccaaaaacgactcttaccgt<br/> tcaacgcgcagatcaacaacttcctggcgaacaacaaagacatcaacatcatcggtggtgaccg<br/> tggtgaaaaacacctggtttactactctgttatcaccaggcgtctgacatcctggaatctggtt<br/> ctctgaacgaactgaacggtgtaactacgcgaaaaactgggtaaaaaagcggaacacctgaa<br/> caggcgcgtcgtgactggcaggacgttcagggtatcaaagacctgaaaaaaggttacatctctca<br/> ggttgttcgtaaacggcgacctggcgatcaaacacaacgcgatcatcatcctggaagacctga<br/> acatgcgtttcaaacaggttcgtgggtggtatcgaaaaatctatctaccagcagctggaaaaagcg<br/> ctgatcgacaaactgtctttcctggtgacaaaaggtgaaaaaacccggaacaggcgggtcacct<br/> gctgaaagcgtaccagctgtctgcgccgttcgaaaccttcagaaaaatgggtaaacagaccggta<br/> tcctctctacaccaggcgtcttacacctctaaatctgacctgggttaccggttgccgctccgcac<br/> ctgtacctgaaatacttctctgcgaaaaaagcgaaagacgacatcgcgaaattcaccaaaaatcga<br/> attcgttaacgacctttcgaactgacctacgacatcaaagacttcagcaggcgaaagaataacc<br/> cgaacaaaacctgttgaaagtttgcctaacgttgaacgttccggtgggacaaaaacctgaac<br/> cagaacaaaggtggttacaccactacaccaacatcaccgaaaaacatccaggaactgttcacca<br/> ataggtatcgacatcaccaaagacctgtgacctcagatctctaccatcgacgaaaaacagaaca<br/> cctctttcttcctgacttcatcttctacttcaacctgatctgccagatccgtaacaccgacgac<br/> tctgaaatcgcaaaaaaacggtaaaagacgacttcatcctgtctccggttgaaccttcttcca<br/> ctctcgtaaaagacaacggtaacaaactgccgaaaaacggtagcacaacgggtgcgtacaacatcg<br/> cgcgtaaaaggtatcgttatcctgaacaaaatctctcagtactctgaaaaaacgaaaactgcgaa<br/> aaaatgaaatggggtagcctgtacgtttctaacatcgactgggacaacttcggttgaGAAATCAT<br/> CCTTAGCGAAAGCTAAGGCTGATACTCTCC</p>                                        |
| SC_Cpf1_5 | <p>CGTATGATAAATACTTCCTTCATATGCCTATTACGATCaactaccaggcggcgaactctccgtct<br/> aattcaaccagcgtgtaacgcgtacctgaaagaacaccggaaaccccgatcatcggtatcga<br/> ccgtggtgaacgtaacctgatctacatcaccgttatcgactctaccggtaaaatcctggaacagc<br/> gttctctgaacaccatccagcagttcgactaccagaaaaactggacaacctgaaaaagaacgt<br/> gttgcggcgcgtcaggcgtggtctgttgggtaccatcaaagacctgaaacaggttacctgtc<br/> tcaggtatccacgaaatcgttgacctgatgatccactaccaggcgttggttgcttggaaaacc<br/> tgaacttcggtttcaaatctaaacgtaccggtatcgcgaaaaaagcggtttaccagcagttcgaa<br/> aaaatgctgatcgacaaactgaactgcctggttctgaaagactaccggcggaaaaagttggtgg<br/> tgttcgaacctgaccgctgacctcaccctcttaaaatcgacctgacctgacctgacctgacctg<br/> gtttctgttctacgttccggcgccgtacacctctaaatcgacctgacctgacctgacctgacctg<br/> ccgttcggttgaaaaccatcaaaaaccagaaatctcgtaaacacttctggaaggttctgactt<br/> cctgcactacgacgttaaacgggtgacttcatcctgcacttcaaatgaacctgaacctgtctt<br/> tccagcgtggtctgccgggttctatgccggcgtgggacatcgtttgcgaaaaaacgaaacctag<br/> ttcgacgcgaaaggtacctcctcgcgggtaaacgtatcgttccggttatcgaaaaccaccg<br/> tttaccggtcgttaccgtgacctgtaccggcgaacgaactgatcgcgctgctggaagaaaaag<br/> gtatcgttttccgtgacggttctaacatcctgccgaaactgctgaaaaacgacgactctcacgcg<br/> atcgacaccatggttgcgctgatccgttctgtctgcagatgcgtaactctaacgcggcgaccgg<br/> tgaagactacatcaactctccggttcgtgacctgaacgggtgttctgcttgcactctcgttccaga<br/> acctggaatggccgatggacgcggacgcgaacgggtgcgtaccacatcgcgctgaaaggtcagctg<br/> ctgctgaaccacctgaaagaatctaaagacctgaaactgcagaacgggtatcttaaccaggactg<br/> gctggcgtacatccaggaactgcgtaactatgaGAAATCATCCTTAGCGAAAGCTAAGGCTGATA<br/> CTCTCC</p> |

|           |                                                                                                                                                                                                                                                                                                                                                                                                                                                                                                                                                                                                                                                                                                                                                                                                                                                                                               |
|-----------|-----------------------------------------------------------------------------------------------------------------------------------------------------------------------------------------------------------------------------------------------------------------------------------------------------------------------------------------------------------------------------------------------------------------------------------------------------------------------------------------------------------------------------------------------------------------------------------------------------------------------------------------------------------------------------------------------------------------------------------------------------------------------------------------------------------------------------------------------------------------------------------------------|
| SD_Cpf1_6 | <p>CGGCTGCATTTTTATGTGCCTGCTGCATACACGAGCaagattgatccgaccacggccttcgcca<br/> atgttctgaatctgtcgaaggtacgcaatgttgatgcgatcaaaagcttttttctaacttcaac<br/> gaaattagttatagcaagaaagaagcccttttcaaattctcattcgatctggattcactgagtaa<br/> gaaagccttttagtagctttgtgaaattagtaagagtaaataaggaacgtctacacctttggagaac<br/> gtatcataaagccaaagaataagcaaggttatcgggaggacaaaagaatcaacttgacctcgag<br/> atgaagaagtacttaacgagtataaggtttcttttgatcttgaaaataacttgattccgaatct<br/> cacgagtccaacctgaaggatactttttggaaagagctattctttatcttcaagactacgctgc<br/> agctccgtaacagcgttactaacggtaaagaagatgtgctcatctctccggcaaaaatgcgaag<br/> ggtgaattcttcgtttcgggaacgcataacaagactcttcgcaagattgcgatgcgaacgggtgc<br/> ataccatattgcggttgaaaggtctgatgatactcgaacgtaacaacctgtacgtgaggagaaag<br/> atacgaaaaagattatggcgatttcaaacgtggattggttcgagtacgtgcgaaacgtagaggc<br/> gttctgtaaGAAATCATCCTTAGCGAAAGCTAAGGCTGATACTCTTCC</p>                               |
| CT_Cpf1_6 | <p>CGGCTGCATTTTTATGTGCCTGCTGCATACACGAGCaaaatcgaccgaccaccggtttcgtta<br/> acctgttcaacacctcttctaaaaccaacgcgcaggaacgtaagaattctctgcagaattcgaa<br/> tctatctcttactctgcgaaagacgggtggtatcttcgcttcgcttcgactaccgtaaatctgg<br/> tacctctaaaaccgaccacaaaaacgtttgaccgcgtacaccaacggatgaacgtatgcgttaca<br/> tcaaagaaaaaacgtaacgaactgttcgaccgctc aaagaaatcaaagaagcgtgacctct<br/> tctggatcaaatacgcggtggtcagaacatcctgccgacatcctgcgttctaacaacaacgg<br/> tctgatctacaccatgtactcttctttcatcgcgccgatccagatgcgtgtttacgacggtaaag<br/> aagactacatcatctctccgatcaaaaactc aaaggtgaattcttcgctaccgaccgaaacgt<br/> cgtgaactgccgatcgacgcggacgcgaacgggtgcgtacaacatcgcgctgcgtggtgaactgac<br/> catgcgtgcgatcgcgaaaaattcgaccggactctgaaaaatggcgaaactggaactgaaac<br/> acaaagactggttcgaattcatgcagaccgtgggtgactaaGAAATCATCCTTAGCGAAAGCTAA<br/> GGCTGATACTCTTCC</p>                                                                        |
| TX_Cpf1_6 | <p>CGGCTGCATTTTTATGTGCCTGCTGCATACACGAGCttctgttttacgtgccggcagattatac<br/> ttcaaaaatcgatccaacaactggctttgtgaacttctggacctgagatatcagctctgtagaaa<br/> aagctaaacaacttcttagcgattttaatgccattcgttttaacagcgttcagaattactttgaa<br/> ttcgaattgactataaaaaacttactccgaaacgtaaagtcggaaccxaaagtaaatgggtaat<br/> ttgtacgtatggcgatgtcaggtatcagaaccgtcggaaatcaaaaaggctattgggagaccgaag<br/> aagtgaacgtgaccgaaaagctgaaggctctgttcgccagcattcaaaaactacaactgtgatc<br/> gattacgcaaatgatgataacctgatagatgtgatttttagagcaggataaagccagcttttttaa<br/> agaactgttgtggctcctgaaacttacgatgaccttacgacattccaagatcaaatcggaaagatg<br/> atthattctgtcaccggtcaagaatgagcagggtgaattctatgatagtagaaagccggcgaa<br/> gtgtggccgaaagacgccgacccaatggcgccatcatatcgcgctcaaagggctttggaattt<br/> gcagcagattaaccagtggaagaaaggtaaaacctgaaatcggctatcaaaaaccaggttggt<br/> ttagctttatccaagagaaccgtatcaggaatgaGAAATCATCCTTAGCGAAAGCTAAGGCTGA<br/> TACTCTTCC</p> |



|           |                                                                                                                                                                                                                                                                                                                                                                                                                                                                                                                                                                                                                                                                                                                                                                                                                                                                                      |
|-----------|--------------------------------------------------------------------------------------------------------------------------------------------------------------------------------------------------------------------------------------------------------------------------------------------------------------------------------------------------------------------------------------------------------------------------------------------------------------------------------------------------------------------------------------------------------------------------------------------------------------------------------------------------------------------------------------------------------------------------------------------------------------------------------------------------------------------------------------------------------------------------------------|
| CA_Cpf1_6 | <p>CGGCTGCATTTTTATGTGCCTGCTGCATACACGAGCggttatctttatataccggcagcgttc<br/> actagtaaaatagatccgaccactggtttcgccgatctctttgccctgagtaacgttaaaacgt<br/> agcgagcatgCGTgaattctttccaaaatgaaatctgtcatttatgataaagctgaaggcaaat<br/> tcgattcacctttgattacttgattacaactgaagagcgaatgtggctgtacgctgtggacc<br/> gtttacaccgttggtgagcgttcacctattcccgtgtgaaccgcaatatgtacgtaaagtccc<br/> caccgatattatctatgatgccctccagaaagcaggcatttagcgtcgaaggagacttaagggaca<br/> gaattgccgaaagcgaatggcgatagcgtgaagtctatTTTTTtacgattcaaatacgcgctagat<br/> atgcgcggtgagaatcgcgaggaagactacattcaatcacctgtgaaaaatgcctctggggaatt<br/> TTTTTgtcaaaaaatgctggtaaaagcctccacaagatagcgatgcaaacggtgcatataaca<br/> ttgccctgaaaggtattcttcaattacgcatgctgtctgagcagtagaccccaacgcggaatct<br/> attagacttccgctgataaccaataaagcctggctgacattcatgcagtctggcatgaagacctg<br/> gaaaaattagGAAATCATCCTTAGCGAAAGCTAAGGCTGATACTCTTCC</p>                          |
| PC_Cpf1_6 | <p>CGGCTGCATTTTTATGTGCCTGCTGCATACACGAGCgttttatatcccggcttggaaacagagc<br/> aacatagatccgactactggatttggtaatttatTTTcatgccagatgaaaaatgtagataaagc<br/> gaagagcttctttcaaaagtttgattcaattagttacaaccgaaagaaagactggtttgagtttg<br/> cattcgattataaaaaactttactaaaaaggctgaaggaagtcgttctatgtggatattatgcaca<br/> catggttcccgaataaagaattttagaaattccagaagaatggtcaatgggattccgaagaatt<br/> cgcttgacggaggttttaagtctctTTTTgtgcgatagatagattataaccgctgatttga<br/> aaacagctattgtggacgaaaagcaaaaagacttcttcgtggatcttctgaagctattcaaattg<br/> acagtacagatgCGcaacagctggaaagagaaggatttgattatctaattctctctgtagcagg<br/> ggctgatggcgtttcttcgatacaagagagggaataaaagtctgcctaaggatgcagatgcca<br/> atggagcttataatattgccctaaaaggactttgggctctacgccagattcggcaaacctcagaa<br/> ggcggtaaactcaaattggcgatttccaataaggaatggctacagtttgtgcaagagagatctta<br/> cgagaaagactgaGAAATCATCCTTAGCGAAAGCTAAGGCTGATACTCTTCC</p>                     |
| FB_Cpf1_6 | <p>CGGCTGCATTTTTATGTGCCTGCTGCATACACGAGCttctttttatgttctctgctggaacac<br/> atccaaaatcgaccctacaaccggcttcgtcaattacttctataactaaatagaaaacgtcgaca<br/> aagcaaaagcattctttgaaaagttcgaagcaatacgttttaacgctgagaaaaaatatttcgag<br/> ttcgaagtcaagaaatactcagactttaaccccaaagctgagggcacacagcaagcgtggacaat<br/> ctgcacctacggcgagcgcacatcgaaacgaagcgtcaaaaagatcagaataacaaatttgTTTcaa<br/> cacctatcaacctgaccgagaagattgaagacttcttaggtaaaaatcagattgTTTatggcgac<br/> ggtaactgtataaaatcTcaaatagcctcaaaggatgataaagcatttttcgaaacattattata<br/> ttggttcaaaatgacactgcagatgcgcaatagtgagacgcgtacagatattgattatcttatca<br/> gcccgtcatgaacgacaacggtactTTTTtacaactccagagactatgaaaaacttgagaatcca<br/> actctcccaaaagatgctgatgcgaacgggtcttatcacatcgcaaaaaaggtctgatgctgct<br/> gaacaaaatcgaccaagccgatctgactaagaaagttgacctaacgatttcaaatcgggactggt<br/> tacagtttgttcaaaagaacaaatgaGAAATCATCCTTAGCGAAAGCTAAGGCTGATACTCTTCC</p> |

|           |                                                                                                                                                                                                                                                                                                                                                                                                                                                                                                                                                                                                                                                                                                                                                                                                                                                                                            |
|-----------|--------------------------------------------------------------------------------------------------------------------------------------------------------------------------------------------------------------------------------------------------------------------------------------------------------------------------------------------------------------------------------------------------------------------------------------------------------------------------------------------------------------------------------------------------------------------------------------------------------------------------------------------------------------------------------------------------------------------------------------------------------------------------------------------------------------------------------------------------------------------------------------------|
| CR_Cpf1_6 | CGGCTGCATTTTTTATGTGCCTGCTGCATACACGAGCtctacaccaggcgtcttacaccttaa<br>atctgaccgggttaccggttggcgtccgcacctgtacctgaaatacttctctcgcaaaaagcga<br>aagacgacatcgcgaaattcaccaaaatcgaaatcggttaacgaccggttcgaactgacctacgac<br>atcaaagacttccagcagcgaagaataccgaacaaaaccggttggaagtttgcctaacgt<br>tgaacgttccggttgggacaaaacctgaaccagaacaaagggtggttacaccactacaccaaca<br>tcaccgaaaacatccaggaactggtcaccaaatcgggtatcgacatcaccaaagacctgctgacc<br>cagatctctaccatcgacgaaaaacagaacacctctttcttccgtgacttcatcttctacttcaa<br>cctgatctgccagatccgtaacaccgacgactctgaaatcgcaaaaaaacggtaaagacgact<br>tcatctgtctccggttgaaccggttcttcgactctctgtaaagacaacggttaacaaactgccgaa<br>aacggtgacgacaacggtcgtacaacatcgcgctaaagggtatcggtatctgaacaaaatctc<br>tcagtactctgaaaaaacgaaaactcgcaaaaaatgaaatggggtgacctgtacgttcttaaca<br>tcgactgggacaacttcggttgaGAAATCATCCTTAGCGAAAGCTAAGGCTGATACTCTTCC                                                  |
| SC_Cpf1_6 | CGGCTGCATTTTTTATGTGCCTGCTGCATACACGAGCcggtccggcgccgtacaccttaaaatc<br>gaccgctgaccggttccggtgaccggttcggttggaaaaccatcaaaaaccagaaatctcgtaa<br>aacttccctggaagggttcgacttctcgaactacgacggttaaaccgggtgacttcatctcgaact<br>tcaaaatgaaccgtaacctgtctttccagcgtggtctgccgggttccatgccggcgtgggacatc<br>gttttcgaaaaaacgaaaccagttcgacgcgaaagggtacccggttcatcgcggttaaacgtat<br>cgttccggttatcgaaaaccacggttccaccggtcgttaccgtgacctgtaccggcggaacgaac<br>tgatcgcgctgctggaagaaaaagggtatcggttccggtgacggttctaacatctgccgaaactg<br>ctgaaaaacgacgactctcacgcgatcgacaccatggttgcgctgatccggttctgctcgcagat<br>gcgtaactctaacgcggcgaccggtgaagactacatcaactctccggttcgtgacctgaacggtg<br>tttgcctcgaactctcgttccagaaccggaaatggccgatggacgcggacgcgaacggtgcgtac<br>cacatcgcgctgaaaggctcagctgctgctgaaccacctgaaagaatctaaagacctgaaactgca<br>gaacggtatctctaaccaggactggctggcgtacatccaggaactgcgtaactatgaGAAATCAT<br>CCTTAGCGAAAGCTAAGGCTGATACTCTTCC |
| lacZ-1    | TCCTCTGGCGGAAAGCCTACACGAAGCGATTTCTTTATGGCAGGGTGAAACGCAGGTGCCCAGC<br>GGCACCGCGCCTTTCTAATAAGAAATTATCGATGAGCGTGGTGGTTATGCCGATCGCGTCACACT<br>ACGCTTTGACAGCTAGCTCAGTCCTAGGTATAATACTAGTGAATTTCTACTCTTGTAGATGGC<br>GGTGAATTTATCGATGAATCCCAGAAAAGACCCGTCCG                                                                                                                                                                                                                                                                                                                                                                                                                                                                                                                                                                                                                                         |
| lacZ-2    | TCCTCTGGCGGAAAGCCTACACGAAGCGATGTTGTACACGCTGTGCGACCGCTACGGCCTGTATG<br>TGGTGGATGAAGCCTAATAAGAGACCCACGGCATGGTGCCAAATGAATCGTCTGACCGATGATCCG<br>CGCTGGCTATTGACAGCTAGCTCAGTCCTAGGTATAATACTAGTGAATTTCTACTCTTGTAGAT<br>AATATTGGCTTCATCCACCAATCCCAGAAAAGACCCGTCCG                                                                                                                                                                                                                                                                                                                                                                                                                                                                                                                                                                                                                                   |
| lacZ-3    | TCCTCTGGCGGAAAGCCTACACGAAGCGATGCGAATTCACGATGCTGATGCGCAGAACTCTCAC<br>AGCTATTGCCGCGAAATTTCTGGAGCGCGGTAATTTTGTATAGAATTTACGGCTAGCGCTTGACA<br>GCTAGCTCAGTCCTAGGTATAATACTAGTGAATTTCTACTCTTGTAGATATCAACATTAATGT<br>GAGCGATCCCAGAAAAGACCCGTCCG                                                                                                                                                                                                                                                                                                                                                                                                                                                                                                                                                                                                                                                     |
| Galk-1    | TCCTCTGGCGGAAAGCCTGTGAACGAGCATCCAAGGTGTGGCTGTCGTCATCATCAACAGTAAC<br>TTCAAACGTACCCTGGTTGGCAGCGAATACAACACCTAGGGTGAACAGTGCAGACCCGGTGCGCG<br>TTTCTTCCAGCAGCCAGCCCTGCGTGATGTCATTGACAGCTAGCTCAGTCCTAGGTATAATACTA<br>GTGGAATTTCTACTCTTGTAGATGCACTGTTACAGACGGGTGTATCCCAGAAAAGACCCGTCCGC<br>CATGCCGTAGCACTGTGACCCGGCCAACCTCCACCATTG                                                                                                                                                                                                                                                                                                                                                                                                                                                                                                                                                                 |
| Galk-2    | TTCCAGCTCGAAGGCGATCGTGACAATATGCTGGCTGCTGGAAGAAACGCGCACCCGTTTCGCA<br>CTGTTACCCTAGGTGTTGTATTGCTGCCAACAGGGTACGCTTAAAGTTACTGTTGATGATGA<br>CGACAGCCACACCTTTGGGCTTGACAGCTAGCTCAGTCCTAGGTATAATACTAGTGAATTTCTA<br>CTCTTGTAGATAAACGTACCCTGGTTGGCAGATCCCAGAAAAGACCCGTCCGCCATGCCGTACCG<br>ACCCCAATACCCGATTCCGACACCGTAGCACTGTGACCCG                                                                                                                                                                                                                                                                                                                                                                                                                                                                                                                                                                    |

|                     |                                                                                                                                                                                                                                                                                                                                                                                                       |
|---------------------|-------------------------------------------------------------------------------------------------------------------------------------------------------------------------------------------------------------------------------------------------------------------------------------------------------------------------------------------------------------------------------------------------------|
| Galk-3              | TTCCAGCTCGAAGGCGATCTAATGCTCACTATCGCGTGGTGCACAACCTGATCACGGTTTGATAAT<br>CAATCGCGCAGGGCAGAACGAAACCGTCGTTGTAGTCGGTGTGTTACCAATCAAATTCACGCGG<br>CCAGGTATTAAATGGTGTGAGTGGCAGGGTAACCGAATGCGTTGGCAAACAGAGATTGTGTTTT<br>TTCTTTCAGACTCATTCTTACACTCCGGATTCGCGAAAATGGATATCGCTGACTGCGCGCAAAC<br>GTTGACAGCTAGCTCAGTCCTAGGTATAATACTAGTGTCAAAGACCTTTTTAATTTCTACTCTT<br>GTAGATGCTACCCTGCCACTCACACCATCCCAGAAAAGACCCGTCGG |
| CAN1                | GTTCGAAACTTCTCCGCAGTGAAAGATAAATGATCACGTTCTCTATGGAGGATGGCATAGGTGAT<br>GAAGATGAAGGAGAAGTACAGAACGCTGAAGTGAAGAGAGAGCTTGACATATTGGTATGATTGCC<br>CTTGGTGGTACTATTGGTACAGGTCTTTTCATTGGTTTATCCACACCTCTGACCAACGCCGGATC<br>GTCAAAGACCTTTTTAATTTCTACTCTTGTAGATCTTAAGCTCTCTTCACTTCTGCCCGCTT<br>TCCACCGGTGGTCTCTAGAGCTATGCTG                                                                                         |
| spacer for<br>DNMT1 | CTGATGGTCCATGTCTGTTA                                                                                                                                                                                                                                                                                                                                                                                  |
