# Supplementary material for: Synthetic chimeric nucleases function for efficient genome editing
Source: PubMed Central journal article supplement (PMC6892893; doi:10.1038/s41467-019-13500-y), 2019-12-04
Supplement: 41467_2019_13500_MOESM4_ESM.pdf [file 41467_2019_13500_MOESM4_ESM.pdf]

## Reporting Summary

Nature Research wishes to improve the reproducibility of the work that we publish. This form provides structure for consistency and transparency in reporting. For further information on Nature Research policies, see [Authors & References](#), and the [Editorial Policy Checklist](#).

## Statistics

For all statistical analyses, confirm that the following items are present in the figure legend, table legend, main text, or Methods section.

- n/a) Confirmed
- The exact sample size (n) for each experimental group/condition, given as a discrete number and unit of measurement
  - A statement on whether measurements were taken from distinct samples or whether the same sample was measured repeatedly
  - The statistical test(s) used AND whether they are one- or two-sided  
*Only common tests should be described solely by name; describe more complex techniques in the Methods section.*
  - A description of all covariates tested
  - A description of any assumptions or corrections, such as tests of normality and adjustment for multiple comparisons
  - A full description of the statistical parameters including central tendency (e.g. means) or other basic estimates (e.g. regression coefficient) AND variation (e.g. standard deviation) or associated estimates of uncertainty (e.g. confidence intervals)
  - For null hypothesis testing, the test statistic (e.g.  $F$ ,  $t$ ,  $r$ ) with confidence intervals, effect sizes, degrees of freedom and  $P$  value noted  
*Give  $P$  values as exact values whenever suitable.*
  - For Bayesian analysis, information on the choice of priors and Markov chain Monte Carlo settings
  - For hierarchical and complex designs, identification of the appropriate level for tests and full reporting of outcomes
  - Estimates of effect sizes (e.g. Cohen's  $d$ , Pearson's  $r$ ), indicating how they were calculated

*Our web collection on [statistics for biologists](#) contains articles on many of the points above.*

## Software and code

Policy information about [availability of computer code](#)

- Data collection**  Provide a description of all commercial, open source and custom code used to collect the data in this study, specifying the version used OR state that no software was used.
- Data analysis**  Provide a description of all commercial, open source and custom code used to analyse the data in this study, specifying the version used OR state that no software was used.

For manuscripts utilizing custom algorithms or software that are central to the research but not yet described in published literature, software must be made available to editors/reviewers. We strongly encourage code deposition in a community repository (e.g. GitHub). See the Nature Research [guidelines for submitting code & software](#) for further information.

## Data

Policy information about [availability of data](#)

All manuscripts must include a [data availability statement](#). This statement should provide the following information, where applicable:

- Accession codes, unique identifiers, or web links for publicly available datasets
- A list of figures that have associated raw data
- A description of any restrictions on data availability

The data that support the findings of this study are shown in the supplementary files

## Field-specific reporting

Please select the one below that is the best fit for your research. If you are not sure, read the appropriate sections before making your selection.

- Life sciences  Behavioural & social sciences  Ecological, evolutionary & environmental sciences

**Dating methods**  If new dates are provided, describe how they were obtained (e.g. collection, storage, sample pretreatment and measurement), where they were obtained (i.e. lab name), the calibration program and the protocol for quality assurance OR state that no new dates are provided.

Tick this box to confirm that the raw and calibrated dates are available in the paper or in Supplementary Information.

## Animals and other organisms

Policy information about [studies involving animals](#): ARRIVE guidelines recommended for reporting animal research

- Laboratory animals**  For laboratory animals, report species, strain, sex and age OR state that the study did not involve laboratory animals.
- Wild animals**  Provide details on animals observed in or captured in the field; report species, sex and age where possible. Describe how animals were caught and transported and what happened to captive animals after the study (if killed, explain why and describe method; if released, say where and when) OR state that the study did not involve wild animals.
- Field-collected samples**  For laboratory work with field-collected samples, describe all relevant parameters such as housing, maintenance, temperature, photoperiod and end-of-experiment protocol OR state that the study did not involve samples collected from the field.
- Ethics oversight**  Identify the organization(s) that approved or provided guidance on the study protocol. OR state that no ethical approval or guidance was required and explain why not.

Note that full information on the approval of the study protocol must also be provided in the manuscript.

## Human research participants

Policy information about [studies involving human research participants](#)

- Population characteristics**  Describe the covariate-relevant population characteristics of the human research participants (e.g. age, gender, genotypic information, past and current diagnosis and treatment categories). If you filled out the behavioural & social sciences study design questions and have nothing to add here, write "See above."
- Recruitment**  Describe how participants were recruited. Outline any potential self-selection bias or other biases that may be present and how these are likely to impact results.
- Ethics oversight**  Identify the organization(s) that approved the study protocol.

Note that full information on the approval of the study protocol must also be provided in the manuscript.

## Clinical data

Policy information about [clinical studies](#)

All manuscripts should comply with the [ICMJE guidelines for publication of clinical research](#), and a completed [CONSORT checklist](#) must be included with all submissions.

- Clinical trial registration**  Provide the trial registration number from ClinicalTrials.gov or an equivalent agency.
- Study protocol**  Note where the full trial protocol can be accessed OR if not available, explain why.
- Data collection**  Describe the settings and locales of data collection, noting the time periods of recruitment and data collection.
- Outcomes**  Describe how you pre-defined primary and secondary outcome measures and how you assessed these measures.

## ChIP-seq

Data deposition

- Confirm that both raw and final processed data have been deposited in a public database such as [GEO](#).
- Confirm that you have deposited or provided access to graph files (e.g. BED files) for the called peaks.

**Data access links**  For "initial submission" or "revised version" documents, provide reviewer access links. For your "Final submission" document, may remain private before publication.

**Files in database submission**  Provide a list of all files available in the database submission.

**Genome browser session**  Provide a link to an anonymized genome browser session for "initial submission" and "revised version" documents only, to enable peer review. Write "no longer applicable" for "Final submission" documents.

## Methodology

**Replicates**  Describe the experimental replicates, specifying number, type and replicate agreement.

For a reference copy of the document with all sections, see [nature.com/documents/br-reporting-summary-flat.pdf](#)

## Life sciences study design

All studies must disclose on these points even when the disclosure is negative.

- Sample size**  For each experiment, hundreds to tens of thousands of cells were screened.
- Data exclusions**  No data were excluded
- Replication**  All experiments were performed with biological triplicates
- Randomization**  Samples were grouped into control (no protein expressed) and experimental (protein was expressed) groups.
- Blinding**  Blinding was not relevant for this study as all samples were bacterial or human tissue culture cells. For bacterial studies, number of colonies was used as a readout. Multiple people counted colonies across the various experiments. For human cell studies, image analysis software was used for data analysis.

## Reporting for specific materials, systems and methods

We require information from authors about some types of materials, experimental systems and methods used in many studies. Here, indicate whether each material, system or method listed is relevant to your study. If you are not sure if a list item applies to your research, read the appropriate section before selecting a response.

- | Materials & experimental systems                          | Methods                                         |
|-----------------------------------------------------------|-------------------------------------------------|
| n/a) Involved in the study                                | n/a) Involved in the study                      |
| <input type="checkbox"/> Antibodies                       | <input type="checkbox"/> ChIP-seq               |
| <input checked="" type="checkbox"/> Eukaryotic cell lines | <input type="checkbox"/> Flow cytometry         |
| <input type="checkbox"/> Palaeontology                    | <input type="checkbox"/> MRI-based neuroimaging |
| <input type="checkbox"/> Animals and other organisms      |                                                 |
| <input type="checkbox"/> Human research participants      |                                                 |
| <input type="checkbox"/> Clinical data                    |                                                 |

## Antibodies

- Antibodies used**  Describe all antibodies used in the study; as applicable, provide supplier name, catalog number, clone name, and lot number.
- Validation**  Describe the validation of each primary antibody for the species and application, noting any validation statements on the manufacturer's website, relevant citations, antibody profiles in online databases, or data provided in the manuscript.

## Eukaryotic cell lines

Policy information about [cell lines](#)

- Cell line source(s)**  HEK293T
- Authentication**  The HEK293T cell line was ordered from ATCC. Cells had the correct morphology and growth rate for HEK293T cells. No further authentication was done.
- Mycoplasma contamination**  The HEK293T cell line was negative for Mycoplasma contamination.
- Commonly misidentified lines** (See [CLAC](#) register)  HEK293T does not appear in the CLAC register

## Palaeontology

- Specimen provenance**  Provide provenance information for specimens and describe permits that were obtained for the work (including the name of the issuing authority, the date of issue, and any identifying information).
- Specimen deposition**  Indicate where the specimens have been deposited to permit free access by other researchers.

- Sequencing depth**  Describe the sequencing depth for each experiment, providing the total number of reads, uniquely mapped reads, length of reads and whether they were paired- or single-end.
- Antibodies**  Describe the antibodies used for the ChIP-seq experiments; as applicable, provide supplier name, catalog number, clone name, and lot number.
- Peak calling parameters**  Specify the command line program and parameters used for read mapping and peak calling, including the ChIP, control and index files used.
- Data quality**  Describe the methods used to ensure data quality in full detail, including how many peaks are at FDR 5% and above 5-fold enrichment.
- Software**  Describe the software used to collect and analyze the ChIP-seq data. For custom code that has been deposited into a community repository, provide accession details.

## Flow Cytometry

Plots

- Confirm that:**
- The axis labels state the marker and fluorochrome used (e.g. CD4-FITC).
  - The axis scales are clearly visible. Include numbers along axes only for bottom left plot of group (a 'group' is an analysis of identical markers).
  - All plots are contour plots with outliers or pseudocolor plots.
  - A numerical value for number of cells or percentage (with statistics) is provided.

## Methodology

- Sample preparation**  Describe the sample preparation, detailing the biological source of the cells and any tissue processing steps used.
- Instrument**  Identify the instrument used for data collection, specifying make and model number.
- Software**  Describe the software used to collect and analyze the flow cytometry data. For custom code that has been deposited into a community repository, provide accession details.
- Cell population abundance**  Describe the abundance of the relevant cell populations within post-sort fractions, providing details on the purity of the samples and how it was determined.
- Gating strategy**  Describe the gating strategy used for all relevant experiments, specifying the preliminary FSC/SSC gates of the starting cell population, indicating where boundaries between "positive" and "negative" staining cell populations are defined.

Tick this box to confirm that a figure exemplifying the gating strategy is provided in the Supplementary Information.

## Magnetic resonance imaging

Experimental design

- Design type**  Indicate task or resting state; event-related or block design.
- Design specifications**  Specify the number of blocks, trials or experimental units per session and/or subject, and specify the length of each trial or block (if trials are blocked) and interval between trials.
- Behavioral performance measures**  State number and/or type of variables recorded (e.g. correct button press, response time) and what statistics were used to establish that the subjects were performing the task as expected (e.g. mean, range, and/or standard deviation across subjects).

Acquisition

- Imaging type(s)**  Specify: functional, structural, diffusion, perfusion.
- Field strength**  Specify in Tesla
- Sequence & imaging parameters**  Specify the pulse sequence type (gradient echo, spin echo, etc.), imaging type (EPI, spiral, etc.), field of view, matrix size, slice thickness, orientation and TE/TR/flip angle.
- Area of acquisition**  State whether a whole brain scan was used OR define the area of acquisition, describing how the region was determined.
- Diffusion MRI**  Used  Not used

**Preprocessing**

|                            |                                                                                                                                                                                                                                         |
|----------------------------|-----------------------------------------------------------------------------------------------------------------------------------------------------------------------------------------------------------------------------------------|
| Preprocessing software     | Provide detail on software version and revision number and on specific parameters (mode/functions, brain extraction, segmentation, smoothing kernel size, etc.)                                                                         |
| Normalization              | If data were normalized/standardized, describe the approach(es); specify linear or non-linear and define image types used for transformation OR indicate that data were not normalized and explain rationale for lack of normalization. |
| Normalization template     | Describe the template used for normalization/transformation, specifying subject space or group standardized space (e.g. original Talairach, MNI305, ICBM152) OR indicate that the data were not normalized.                             |
| Noise and artifact removal | Describe your procedure(s) for artifact and structured noise removal, specifying motion parameters, tissue signals and physiological signals (heart rate, respiration).                                                                 |
| Volume censoring           | Define your software and/or method and criteria for volume censoring, and state the extent of such censoring.                                                                                                                           |

**Statistical modeling & inference**

|                                                                                                                                 |                                                                                                                                                                                                                  |
|---------------------------------------------------------------------------------------------------------------------------------|------------------------------------------------------------------------------------------------------------------------------------------------------------------------------------------------------------------|
| Model type and settings                                                                                                         | Specify type (mass univariate, multivariate, RSA, predictive, etc.) and describe essential details of the model at the first and second levels (e.g. fixed, random or mixed effects; drift or auto-correlation). |
| Effect(s) tested                                                                                                                | Define precise effect in terms of the task or stimulus conditions instead of psychological concepts and indicate whether ANOVA or factorial designs were used.                                                   |
| Specify type of analysis: <input type="checkbox"/> Whole brain <input type="checkbox"/> ROI-based <input type="checkbox"/> Both |                                                                                                                                                                                                                  |
| Statistic type for inference (See <a href="#">Eklund et al. 2016</a> )                                                          | Specify voxel-wise or cluster-wise and report all relevant parameters for cluster-wise methods.                                                                                                                  |
| Correction                                                                                                                      | Describe the type of correction and how it is obtained for multiple comparisons (e.g. FWE, FDR, permutation or Monte Carlo).                                                                                     |

**Models & analysis**

|                                               |                                                                                                                                                                                                                           |
|-----------------------------------------------|---------------------------------------------------------------------------------------------------------------------------------------------------------------------------------------------------------------------------|
| n/a                                           | Involvement in the study                                                                                                                                                                                                  |
| <input type="checkbox"/>                      | Functional and/or effective connectivity                                                                                                                                                                                  |
| <input type="checkbox"/>                      | Graph analysis                                                                                                                                                                                                            |
| <input type="checkbox"/>                      | Multivariate modeling or predictive analysis                                                                                                                                                                              |
| Functional and/or effective connectivity      | Report the measures of dependence used and the model details (e.g. Pearson correlation, partial correlation, mutual information).                                                                                         |
| Graph analysis                                | Report the dependent variable and connectivity measure, specifying weighted graph or binarized graph, subject- or group-level, and the global and/or node summaries used (e.g. clustering coefficient, efficiency, etc.). |
| Multivariate modeling and predictive analysis | Specify independent variables, features extraction and dimension reduction, model, training and evaluation metrics.                                                                                                       |
