# Supplementary material for: Synthetic chimeric nucleases function for efficient genome editing
Source: PubMed Central journal article supplement (PMC6892893; doi:10.1038/s41467-019-13500-y), 2019-12-04
Supplement: 41467_2019_13500_MOESM5_ESM.pdf [file 41467_2019_13500_MOESM5_ESM.pdf]

**Title:** Supplementary Data 1

**Description:** The oligos and sequences used in this study
